# Supplementary material for: Performance of next-generation sequencing on small tumor specimens and/or low tumor content samples using a commercially available platform
Source: PLoS One. 2018 Apr 27;13(4):e0196556. doi: 10.1371/journal.pone.0196556 (PMC5922576; doi:10.1371/journal.pone.0196556)
Supplement: S1 Table — (XLSX) [file pone.0196556.s001.xlsx]

## Sheet: Sheet1
Cases::CaseNumberPCDx	Samples_Orders_OrdersID::TumorType	Cases::TumorPercentFinal	LabResults::CurlArea	BrandName	CancerType	Biomarker	Cutoff Type	Cutoff Value
Case 1	Mesothelioma Pleura	80%	15	None	Gastric Cancer	TS (TYMS)	mRNA	High
	Mesothelioma Pleura	80%	15	Xeloda®	Breast Cancer - Invasive	TS (TYMS)	mRNA	High
	Mesothelioma Pleura	80%	15	Alimta®	Mesothelioma Pleura	TS (TYMS)	mRNA	High
	Mesothelioma Pleura	80%	15	Taxol®	Non-Small Cell Lung Cancer (NSCLC)	TUBB3	mRNA	High
	Mesothelioma Pleura	80%	15	Taxotere®	Prostate Cancer	TUBB3	mRNA	High
	Mesothelioma Pleura	80%	15	Navelbine®	Non-Small Cell Lung Cancer (NSCLC)	TUBB3	mRNA	High
Case 2	Pancreatic Adenocarcinoma	20%	160	Casodex®	Prostate Cancer	AR	mRNA	High
	Pancreatic Adenocarcinoma	20%	160	None	Prostate Cancer	AR	mRNA	High
	Pancreatic Adenocarcinoma	20%	160	Arimidex®	Breast Cancer - Invasive	ER (ESR1)	mRNA	High
	Pancreatic Adenocarcinoma	20%	160	None	Breast Cancer - Invasive	ER (ESR1)	mRNA	High
	Pancreatic Adenocarcinoma	20%	160	Femara®	Breast Cancer - Invasive	ER (ESR1)	mRNA	High
	Pancreatic Adenocarcinoma	20%	160	Aromasin®	Breast Cancer - Invasive	ER (ESR1)	mRNA	High
	Pancreatic Adenocarcinoma	20%	160	Fareston®	Breast Cancer - Invasive	ER (ESR1)	mRNA	High
	Pancreatic Adenocarcinoma	20%	160	Faslodex®	Breast Cancer - Invasive	ER (ESR1)	mRNA	High
	Pancreatic Adenocarcinoma	20%	160	Herceptin®	Breast Cancer - Invasive	HER2 (ERBB2)	mRNA	High
	Pancreatic Adenocarcinoma	20%	160	Tykerb®	Breast Cancer - Invasive	HER2 (ERBB2)	mRNA	High
	Pancreatic Adenocarcinoma	20%	160	Perjeta™	Breast Cancer - Invasive	HER2 (ERBB2)	mRNA	High
	Pancreatic Adenocarcinoma	20%	160	None	Rectal Cancer	survivin (BIRC5)	mRNA	High
	Pancreatic Adenocarcinoma	20%	160	Platinol®, Platinol®-AQ	Bladder Cancer	survivin (BIRC5)	mRNA	High
	Pancreatic Adenocarcinoma	20%	160	Xeloda®	Breast Cancer - Invasive	TP (TYMP)	mRNA	High
	Pancreatic Adenocarcinoma	20%	160	Erbitux®	Colon Cancer	KRAS	DNA	c.34G>T p.G12C; c.34G>C p.G12R; c.34G>A p.G12S; c.35G>C p.G12A; c.35G>A p.G12D; c.35G>T p.G12V; c.37G>T p.G13C; c.37G>C p.G13R; c.37G>A p.G13S; c.38G>C p.G13A; c.38G>A p.G13D; c.38G>T p.G13V; c.181C>A p.Q61K; c.182A>T p.Q61L; c.182A>G p.Q61R; c.183A>C p.Q61H; c.183A>T p.Q61H; c.351A>C p.K117N; c.351A>T p.K117N; c.436G>C p.A146P; c.436G>A p.A146T; c.437C>T p.A146V
	Pancreatic Adenocarcinoma	20%	160	Vectibix®	Colon Cancer	KRAS	DNA	c.34G>T p.G12C; c.34G>C p.G12R; c.34G>A p.G12S; c.35G>C p.G12A; c.35G>A p.G12D; c.35G>T p.G12V; c.37G>T p.G13C; c.37G>C p.G13R; c.37G>A p.G13S; c.38G>C p.G13A; c.38G>A p.G13D; c.38G>T p.G13V; c.181C>A p.Q61K; c.182A>T p.Q61L; c.182A>G p.Q61R; c.183A>C p.Q61H; c.183A>T p.Q61H; c.351A>C p.K117N; c.351A>T p.K117N; c.436G>C p.A146P; c.436G>A p.A146T; c.437C>T p.A146V
	Pancreatic Adenocarcinoma	20%	160	Ellence®	Breast Cancer - Invasive	TOPO IIa	mRNA	High
	Pancreatic Adenocarcinoma	20%	160	None	Breast Cancer - Invasive	TOPO IIa	mRNA	High
	Pancreatic Adenocarcinoma	20%	160	Taxol®	Non-Small Cell Lung Cancer (NSCLC)	TUBB3	mRNA	High
	Pancreatic Adenocarcinoma	20%	160	Taxotere®	Prostate Cancer	TUBB3	mRNA	High
	Pancreatic Adenocarcinoma	20%	160	Navelbine®	Non-Small Cell Lung Cancer (NSCLC)	TUBB3	mRNA	High
	Pancreatic Adenocarcinoma	20%	160	Kadcyla™	Breast Cancer - Invasive	HER2 (ERBB2)	mRNA	High
	Pancreatic Adenocarcinoma	20%	160	Zytiga®	Prostate Cancer	AR	mRNA	High
	Pancreatic Adenocarcinoma	20%	160	Provera®	Breast Cancer - Invasive	AR	mRNA	High
	Pancreatic Adenocarcinoma	20%	160	Tarceva®	Non-Small Cell Lung Cancer (NSCLC)	KRAS	DNA	c.34G>T p.G12C; c.34G>C p.G12R; c.34G>A p.G12S; c.35G>C p.G12A; c.35G>A p.G12D; c.35G>T p.G12V; c.37G>T p.G13C; c.37G>C p.G13R; c.37G>A p.G13S; c.38G>C p.G13A; c.38G>A p.G13D; c.38G>T p.G13V; c.181C>A p.Q61K; c.182A>T p.Q61L; c.182A>G p.Q61R; c.183A>C p.Q61H; c.183A>T p.Q61H; c.351A>C p.K117N; c.351A>T p.K117N; c.436G>C p.A146P; c.436G>A p.A146T; c.437C>T p.A146V
	Pancreatic Adenocarcinoma	20%	160	Camptosar®	Rectal Cancer	TOP1	IHC	Positive
	Pancreatic Adenocarcinoma	20%	160	Hycamtin® Injection	Ovarian Cancer – Epithelial Ovarian Cancer/Fallopian Tube Cancer/Primary Peritoneal Cancer	TOP1	IHC	Positive
	Pancreatic Adenocarcinoma	20%	160	Gemzar®	Pancreatic Adenocarcinoma	hENT1 (SLC29A1)	IHC	Negative
Case 3	(no rules apply)
Case 4	Breast Cancer - Invasive	30%	532	None	Rectal Cancer	survivin (BIRC5)	mRNA	High
	Breast Cancer - Invasive	30%	532	Platinol®, Platinol®-AQ	Bladder Cancer	survivin (BIRC5)	mRNA	High
	Breast Cancer - Invasive	30%	532	None	Gastric Cancer	TS (TYMS)	mRNA	High
	Breast Cancer - Invasive	30%	532	Alimta®	Mesothelioma Pleura	TS (TYMS)	mRNA	High
	Breast Cancer - Invasive	30%	532	Erbitux®	Colon Cancer	PIK3CA	DNA	none detected
	Breast Cancer - Invasive	30%	532	Vectibix®	Colon Cancer	PIK3CA	DNA	none detected
	Breast Cancer - Invasive	30%	532	Ellence®	Breast Cancer - Invasive	TOPO IIa	mRNA	High
	Breast Cancer - Invasive	30%	532	None	Breast Cancer - Invasive	TOPO IIa	mRNA	High
	Breast Cancer - Invasive	30%	532	Taxotere®	Prostate Cancer	TUBB3	mRNA	High
	Breast Cancer - Invasive	30%	532	Navelbine®	Non-Small Cell Lung Cancer (NSCLC)	TUBB3	mRNA	High
	Breast Cancer - Invasive	30%	532	None	Breast Cancer - Invasive	EZH2	mRNA	High
	Breast Cancer - Invasive	30%	532	Taxol®	Breast Cancer - Invasive	TUBB3	mRNA	High
Case 5	Colon Cancer	35%	504	Zelboraf™	Melanoma	BRAF	DNA	none detected
	Colon Cancer	35%	504	Erbitux®	Colon Cancer	KRAS	DNA	c.34G>T p.G12C; c.34G>C p.G12R; c.34G>A p.G12S; c.35G>C p.G12A; c.35G>A p.G12D; c.35G>T p.G12V; c.37G>T p.G13C; c.37G>C p.G13R; c.37G>A p.G13S; c.38G>C p.G13A; c.38G>A p.G13D; c.38G>T p.G13V; c.181C>A p.Q61K; c.182A>T p.Q61L; c.182A>G p.Q61R; c.183A>C p.Q61H; c.183A>T p.Q61H; c.351A>C p.K117N; c.351A>T p.K117N; c.436G>C p.A146P; c.436G>A p.A146T; c.437C>T p.A146V
	Colon Cancer	35%	504	Vectibix®	Colon Cancer	KRAS	DNA	c.34G>T p.G12C; c.34G>C p.G12R; c.34G>A p.G12S; c.35G>C p.G12A; c.35G>A p.G12D; c.35G>T p.G12V; c.37G>T p.G13C; c.37G>C p.G13R; c.37G>A p.G13S; c.38G>C p.G13A; c.38G>A p.G13D; c.38G>T p.G13V; c.181C>A p.Q61K; c.182A>T p.Q61L; c.182A>G p.Q61R; c.183A>C p.Q61H; c.183A>T p.Q61H; c.351A>C p.K117N; c.351A>T p.K117N; c.436G>C p.A146P; c.436G>A p.A146T; c.437C>T p.A146V
	Colon Cancer	35%	504	Tafinlar	Melanoma	BRAF	DNA	none detected
	Colon Cancer	35%	504	Mekinist	Melanoma	BRAF	DNA	none detected
	Colon Cancer	35%	504	Tarceva®	Non-Small Cell Lung Cancer (NSCLC)	KRAS	DNA	c.34G>T p.G12C; c.34G>C p.G12R; c.34G>A p.G12S; c.35G>C p.G12A; c.35G>A p.G12D; c.35G>T p.G12V; c.37G>T p.G13C; c.37G>C p.G13R; c.37G>A p.G13S; c.38G>C p.G13A; c.38G>A p.G13D; c.38G>T p.G13V; c.181C>A p.Q61K; c.182A>T p.Q61L; c.182A>G p.Q61R; c.183A>C p.Q61H; c.183A>T p.Q61H; c.351A>C p.K117N; c.351A>T p.K117N; c.436G>C p.A146P; c.436G>A p.A146T; c.437C>T p.A146V
	Colon Cancer	35%	504	Afinitor®	Colon Cancer	KRAS	DNA	c.34G>T p.G12C; c.34G>C p.G12R; c.34G>A p.G12S; c.35G>C p.G12A; c.35G>A p.G12D; c.35G>T p.G12V; c.37G>T p.G13C; c.37G>C p.G13R; c.37G>A p.G13S; c.38G>C p.G13A; c.38G>A p.G13D; c.38G>T p.G13V; c.181C>A p.Q61K; c.182A>T p.Q61L; c.182A>G p.Q61R; c.183A>C p.Q61H; c.183A>T p.Q61H; c.351A>C p.K117N; c.351A>T p.K117N; c.436G>C p.A146P; c.436G>A p.A146T; c.437C>T p.A146V
	Colon Cancer	35%	504	Avastin®	Colon Cancer	CA IX	IHC	Positive
	Colon Cancer	35%	504	None	Breast Cancer - Invasive	CA IX	IHC	Positive
	Colon Cancer	35%	504	Ellence®	Breast Cancer - Invasive	CA IX	IHC	Positive
	Colon Cancer	35%	504	None	Rectal Cancer	CA IX	IHC	Positive
	Colon Cancer	35%	504	Temodar®	Colon Cancer	MGMT	IHC	Positive
	Colon Cancer	35%	504	BiCNU®	Central Nervous System Cancers - Glioblastoma	MGMT	IHC	Positive
	Colon Cancer	35%	504	Hycamtin® Injection	Ovarian Cancer – Epithelial Ovarian Cancer/Fallopian Tube Cancer/Primary Peritoneal Cancer	TOP1	IHC	Positive
	Colon Cancer	35%	504	Gemzar®	Pancreatic Adenocarcinoma	hENT1 (SLC29A1)	IHC	Positive
	Colon Cancer	35%	504	Taxotere®	Ovarian Cancer – Epithelial Ovarian Cancer/Fallopian Tube Cancer/Primary Peritoneal Cancer	TLE3	IHC	Negative
	Colon Cancer	35%	504	Taxol®	Ovarian Cancer – Epithelial Ovarian Cancer/Fallopian Tube Cancer/Primary Peritoneal Cancer	TLE3	IHC	Negative
	Colon Cancer	35%	504	Yervoy™	Melanoma	NRAS	DNA	None detected
	Colon Cancer	35%	504		Melanoma	NRAS	DNA	None detected
	Colon Cancer	35%	504		Melanoma	NRAS	DNA	None detected
	Colon Cancer	35%	504	Stivarga	Colon Cancer	KRAS	DNA	c.34G>T p.G12C; c.34G>C p.G12R; c.34G>A p.G12S; c.35G>C p.G12A; c.35G>A p.G12D; c.35G>T p.G12V; c.37G>T p.G13C; c.37G>C p.G13R; c.37G>A p.G13S; c.38G>C p.G13A; c.38G>A p.G13D; c.38G>T p.G13V; c.181C>A p.Q61K; c.182A>T p.Q61L; c.182A>G p.Q61R; c.183A>C p.Q61H; c.183A>T p.Q61H; c.351A>C p.K117N; c.351A>T p.K117N; c.436G>C p.A146P; c.436G>A p.A146T; c.437C>T p.A146V
	Colon Cancer	35%	504	Camptosar®	Colon Cancer	TOP1	IHC	Positive
Case 6	(no rules apply)
Case 7	Ovarian Cancer – Epithelial Ovarian Cancer/Fallopian Tube Cancer/Primary Peritoneal Cancer	80%	748	Avastin®	Colon Cancer	CA IX	mRNA	High
	Ovarian Cancer – Epithelial Ovarian Cancer/Fallopian Tube Cancer/Primary Peritoneal Cancer	80%	748	Tarceva®	Non-Small Cell Lung Cancer (NSCLC)	E-cadherin (CDH1 )	mRNA	High
	Ovarian Cancer – Epithelial Ovarian Cancer/Fallopian Tube Cancer/Primary Peritoneal Cancer	80%	748	None	Rectal Cancer	survivin (BIRC5)	mRNA	High
	Ovarian Cancer – Epithelial Ovarian Cancer/Fallopian Tube Cancer/Primary Peritoneal Cancer	80%	748	Platinol®, Platinol®-AQ	Bladder Cancer	survivin (BIRC5)	mRNA	High
	Ovarian Cancer – Epithelial Ovarian Cancer/Fallopian Tube Cancer/Primary Peritoneal Cancer	80%	748	None	Gastric Cancer	TS (TYMS)	mRNA	High
	Ovarian Cancer – Epithelial Ovarian Cancer/Fallopian Tube Cancer/Primary Peritoneal Cancer	80%	748	Xeloda®	Breast Cancer - Invasive	TS (TYMS)	mRNA	High
	Ovarian Cancer – Epithelial Ovarian Cancer/Fallopian Tube Cancer/Primary Peritoneal Cancer	80%	748	Alimta®	Mesothelioma Pleura	TS (TYMS)	mRNA	High
	Ovarian Cancer – Epithelial Ovarian Cancer/Fallopian Tube Cancer/Primary Peritoneal Cancer	80%	748	Taxotere®	Prostate Cancer	TUBB3	mRNA	High
	Ovarian Cancer – Epithelial Ovarian Cancer/Fallopian Tube Cancer/Primary Peritoneal Cancer	80%	748	Navelbine®	Non-Small Cell Lung Cancer (NSCLC)	TUBB3	mRNA	High
	Ovarian Cancer – Epithelial Ovarian Cancer/Fallopian Tube Cancer/Primary Peritoneal Cancer	80%	748	None	Rectal Cancer	CA IX	mRNA	High
	Ovarian Cancer – Epithelial Ovarian Cancer/Fallopian Tube Cancer/Primary Peritoneal Cancer	80%	748	Erbitux®	Colon Cancer	E-cadherin (CDH1 )	mRNA	High
	Ovarian Cancer – Epithelial Ovarian Cancer/Fallopian Tube Cancer/Primary Peritoneal Cancer	80%	748	Taxol®	Ovarian Cancer – Epithelial Ovarian Cancer/Fallopian Tube Cancer/Primary Peritoneal Cancer	TUBB3	mRNA	High
	Ovarian Cancer – Epithelial Ovarian Cancer/Fallopian Tube Cancer/Primary Peritoneal Cancer	80%	748	Herceptin®	Breast Cancer - Invasive	ERBB3	mRNA	High
Case 8	Non-Melanoma Skin Cancers - Basal Cell Skin Cancers	25%	154	Sandostatin®	Neuroendocrine Tumors - Multiple Endocrine Neoplasia, Type 1	SSTR2	mRNA	High
	Non-Melanoma Skin Cancers - Basal Cell Skin Cancers	25%	154	None	Rectal Cancer	survivin (BIRC5)	mRNA	High
	Non-Melanoma Skin Cancers - Basal Cell Skin Cancers	25%	154	Platinol®, Platinol®-AQ	Bladder Cancer	survivin (BIRC5)	mRNA	High
	Non-Melanoma Skin Cancers - Basal Cell Skin Cancers	25%	154	Taxol®	Non-Small Cell Lung Cancer (NSCLC)	TUBB3	mRNA	High
	Non-Melanoma Skin Cancers - Basal Cell Skin Cancers	25%	154	Taxotere®	Prostate Cancer	TUBB3	mRNA	High
	Non-Melanoma Skin Cancers - Basal Cell Skin Cancers	25%	154	Navelbine®	Non-Small Cell Lung Cancer (NSCLC)	TUBB3	mRNA	High
	Non-Melanoma Skin Cancers - Basal Cell Skin Cancers	25%	154	Somatuline® Depot	Neuroendocrine Tumors - Adrenal Gland Tumors	SSTR2	mRNA	High
	Non-Melanoma Skin Cancers - Basal Cell Skin Cancers	25%	154	Avastin®	Colon Cancer	CA IX	IHC	Positive
	Non-Melanoma Skin Cancers - Basal Cell Skin Cancers	25%	154	None	Rectal Cancer	CA IX	IHC	Positive
	Non-Melanoma Skin Cancers - Basal Cell Skin Cancers	25%	154	Temodar®	Central Nervous System Cancers - Glioblastoma	MGMT	IHC	Positive
	Non-Melanoma Skin Cancers - Basal Cell Skin Cancers	25%	154	BiCNU®	Central Nervous System Cancers - Glioblastoma	MGMT	IHC	Positive
	Non-Melanoma Skin Cancers - Basal Cell Skin Cancers	25%	154	Vectibix®	Colon Cancer	PTEN	IHC	Negative
	Non-Melanoma Skin Cancers - Basal Cell Skin Cancers	25%	154	Iressa®	Non-Small Cell Lung Cancer (NSCLC)	PTEN	IHC	Negative
	Non-Melanoma Skin Cancers - Basal Cell Skin Cancers	25%	154	Tarceva®	Pancreatic Adenocarcinoma	PTEN	IHC	Negative
	Non-Melanoma Skin Cancers - Basal Cell Skin Cancers	25%	154	Zanosar®	Neuroendocrine Tumors - Neuroendocrine Tumors of the GI Tract, Lung, and Thymus (Carcinoid Tumors)	PTEN	IHC	Negative
	Non-Melanoma Skin Cancers - Basal Cell Skin Cancers	25%	154	Gemzar®	Pancreatic Adenocarcinoma	hENT1 (SLC29A1)	IHC	Positive
	Non-Melanoma Skin Cancers - Basal Cell Skin Cancers	25%	154		Melanoma	PDL1 Tumor	IHC	Positive
	Non-Melanoma Skin Cancers - Basal Cell Skin Cancers	25%	154	Keytruda®	Non-Small Cell Lung Cancer (NSCLC)	PDL1 Tumor	IHC	Positive
Case 9	Adenoid cystic carcinoma	70%		Temodar®	Central Nervous System Cancers - Glioblastoma	MGMT	IHC	Positive
	Adenoid cystic carcinoma	70%		BiCNU®	Central Nervous System Cancers - Glioblastoma	MGMT	IHC	Positive
	Adenoid cystic carcinoma	70%		Halaven®	Breast Cancer - Invasive	HER2 (ERBB2)	IHC	Negative
	Adenoid cystic carcinoma	70%		Opdivo® + Yervoy®	Melanoma	PDL1 Tumor	IHC	Negative
Case 10	Breast Cancer - Invasive	70%	368	Herceptin®	Breast Cancer - Invasive	HER2 (ERBB2)	mRNA	High
	Breast Cancer - Invasive	70%	368	Tykerb®	Breast Cancer - Invasive	HER2 (ERBB2)	mRNA	High
	Breast Cancer - Invasive	70%	368	Perjeta™	Breast Cancer - Invasive	HER2 (ERBB2)	mRNA	High
	Breast Cancer - Invasive	70%	368	None	Rectal Cancer	survivin (BIRC5)	mRNA	High
	Breast Cancer - Invasive	70%	368	Platinol®, Platinol®-AQ	Bladder Cancer	survivin (BIRC5)	mRNA	High
	Breast Cancer - Invasive	70%	368	Ellence®	Breast Cancer - Invasive	TOPO IIa	mRNA	High
	Breast Cancer - Invasive	70%	368	None	Breast Cancer - Invasive	TOPO IIa	mRNA	High
	Breast Cancer - Invasive	70%	368	Navelbine®	Non-Small Cell Lung Cancer (NSCLC)	TUBB3	mRNA	High
	Breast Cancer - Invasive	70%	368	Kadcyla™	Breast Cancer - Invasive	HER2 (ERBB2)	mRNA	High
	Breast Cancer - Invasive	70%	368	None	Breast Cancer - Invasive	EZH2	mRNA	High
	Breast Cancer - Invasive	70%	368	Herceptin®	Breast Cancer - Invasive	HER2 (ERBB2)	IHC	Positive
	Breast Cancer - Invasive	70%	368	Tykerb®	Breast Cancer - Invasive	HER2 (ERBB2)	IHC	Positive
	Breast Cancer - Invasive	70%	368	Perjeta™	Breast Cancer - Invasive	HER2 (ERBB2)	IHC	Positive
	Breast Cancer - Invasive	70%	368	Kadcyla™	Breast Cancer - Invasive	HER2 (ERBB2)	IHC	Positive
	Breast Cancer - Invasive	70%	368	Temodar®	Central Nervous System Cancers - Glioblastoma	MGMT	IHC	Positive
	Breast Cancer - Invasive	70%	368	BiCNU®	Central Nervous System Cancers - Glioblastoma	MGMT	IHC	Positive
	Breast Cancer - Invasive	70%	368	Iressa®	Non-Small Cell Lung Cancer (NSCLC)	PTEN	IHC	Negative
	Breast Cancer - Invasive	70%	368	Tarceva®	Pancreatic Adenocarcinoma	PTEN	IHC	Negative
	Breast Cancer - Invasive	70%	368	Zanosar®	Neuroendocrine Tumors - Neuroendocrine Tumors of the GI Tract, Lung, and Thymus (Carcinoid Tumors)	PTEN	IHC	Negative
	Breast Cancer - Invasive	70%	368	Navelbine®	Non-Small Cell Lung Cancer (NSCLC)	TUBB3	IHC	Positive
	Breast Cancer - Invasive	70%	368	Gemzar®	Pancreatic Adenocarcinoma	hENT1 (SLC29A1)	IHC	Positive
	Breast Cancer - Invasive	70%	368	Xeloda®	Breast Cancer - Invasive	TP (TYMP)	IHC	Positive
	Breast Cancer - Invasive	70%	368		Breast Cancer - Invasive	ER (ESR1)	DNA	None Detected
	Breast Cancer - Invasive	70%	368		Breast Cancer - Invasive	ER (ESR1)	mRNA	Not Changed
	Breast Cancer - Invasive	70%	368		Breast Cancer - Invasive	PR (PGR)	mRNA	Not Changed
	Breast Cancer - Invasive	70%	368		Breast Cancer - Invasive	PIK3CA	DNA	None Detected
	Breast Cancer - Invasive	70%	368		Breast Cancer - Invasive	AR	mRNA	Not Changed
	Breast Cancer - Invasive	70%	368	Opdivo® + Yervoy®	Melanoma	PDL1 Tumor	IHC	Negative
	Breast Cancer - Invasive	70%	368	Herceptin®, Tykerb®, + Avastin®	Salivary duct carcinoma	HER2 (ERBB2)	IHC	Positive
	Breast Cancer - Invasive	70%	368	Herceptin®, Tykerb®, + Avastin®	Salivary duct carcinoma	HER2 (ERBB2)	mRNA	High
Case 11	Germ Cell Tumors	90%	50	Gleevec®	Soft Tissue Sarcoma - Gastrointestinal Stromal Tumors (GIST)	KIT	DNA	c.2446G>C p.D816H
Case 12	Ovarian Cancer – Epithelial Ovarian Cancer/Fallopian Tube Cancer/Primary Peritoneal Cancer	15%	300	Afinitor®	Breast Cancer - Invasive	ER (ESR1)	IHC	Positive
	Ovarian Cancer – Epithelial Ovarian Cancer/Fallopian Tube Cancer/Primary Peritoneal Cancer	15%	300	Arimidex®	Breast Cancer - Invasive	ER (ESR1)	IHC	Positive
	Ovarian Cancer – Epithelial Ovarian Cancer/Fallopian Tube Cancer/Primary Peritoneal Cancer	15%	300	None	Breast Cancer - Invasive	ER (ESR1)	IHC	Positive
	Ovarian Cancer – Epithelial Ovarian Cancer/Fallopian Tube Cancer/Primary Peritoneal Cancer	15%	300	Femara®	Breast Cancer - Invasive	ER (ESR1)	IHC	Positive
	Ovarian Cancer – Epithelial Ovarian Cancer/Fallopian Tube Cancer/Primary Peritoneal Cancer	15%	300	Aromasin®	Breast Cancer - Invasive	ER (ESR1)	IHC	Positive
	Ovarian Cancer – Epithelial Ovarian Cancer/Fallopian Tube Cancer/Primary Peritoneal Cancer	15%	300	Fareston®	Breast Cancer - Invasive	ER (ESR1)	IHC	Positive
	Ovarian Cancer – Epithelial Ovarian Cancer/Fallopian Tube Cancer/Primary Peritoneal Cancer	15%	300	Faslodex®	Breast Cancer - Invasive	ER (ESR1)	IHC	Positive
	Ovarian Cancer – Epithelial Ovarian Cancer/Fallopian Tube Cancer/Primary Peritoneal Cancer	15%	300	Camptosar®	Ovarian Cancer – Epithelial Ovarian Cancer/Fallopian Tube Cancer/Primary Peritoneal Cancer	TOP1	IHC	Positive
	Ovarian Cancer – Epithelial Ovarian Cancer/Fallopian Tube Cancer/Primary Peritoneal Cancer	15%	300	Hycamtin® Injection	Ovarian Cancer – Epithelial Ovarian Cancer/Fallopian Tube Cancer/Primary Peritoneal Cancer	TOP1	IHC	Positive
	Ovarian Cancer – Epithelial Ovarian Cancer/Fallopian Tube Cancer/Primary Peritoneal Cancer	15%	300	Gemzar®	Pancreatic Adenocarcinoma	hENT1 (SLC29A1)	IHC	Negative
	Ovarian Cancer – Epithelial Ovarian Cancer/Fallopian Tube Cancer/Primary Peritoneal Cancer	15%	300	Taxotere®	Ovarian Cancer – Epithelial Ovarian Cancer/Fallopian Tube Cancer/Primary Peritoneal Cancer	TLE3	IHC	Positive
	Ovarian Cancer – Epithelial Ovarian Cancer/Fallopian Tube Cancer/Primary Peritoneal Cancer	15%	300	Taxol®	Ovarian Cancer – Epithelial Ovarian Cancer/Fallopian Tube Cancer/Primary Peritoneal Cancer	TLE3	IHC	Positive
	Ovarian Cancer – Epithelial Ovarian Cancer/Fallopian Tube Cancer/Primary Peritoneal Cancer	15%	300		Melanoma	PDL1 Tumor	IHC	Positive
	Ovarian Cancer – Epithelial Ovarian Cancer/Fallopian Tube Cancer/Primary Peritoneal Cancer	15%	300	Keytruda®	Non-Small Cell Lung Cancer (NSCLC)	PDL1 Tumor	IHC	Positive
	Ovarian Cancer – Epithelial Ovarian Cancer/Fallopian Tube Cancer/Primary Peritoneal Cancer	15%	300	Ibrance® + Faslodex®	Breast Cancer - Invasive	ER (ESR1)	IHC	Positive
	Ovarian Cancer – Epithelial Ovarian Cancer/Fallopian Tube Cancer/Primary Peritoneal Cancer	15%	300	Tecentriq	Bladder Cancer	PDL1 TILs	IHC	Positive
Case 13	Ovarian Cancer – Epithelial Ovarian Cancer/Fallopian Tube Cancer/Primary Peritoneal Cancer	15%	300	Tecentriq	Bladder Cancer	PDL1 Tumor	IHC	Positive
Case 14	(no rules apply)
Case 15	Ovarian Cancer – Epithelial Ovarian Cancer/Fallopian Tube Cancer/Primary Peritoneal Cancer	40%	195	Erbitux®	Colon Cancer	amphiregulin (AREG)	mRNA	High
	Ovarian Cancer – Epithelial Ovarian Cancer/Fallopian Tube Cancer/Primary Peritoneal Cancer	40%	195	Erbitux®	Colon Cancer	epiregulin (EREG)	mRNA	High
	Ovarian Cancer – Epithelial Ovarian Cancer/Fallopian Tube Cancer/Primary Peritoneal Cancer	40%	195	Tarceva®	Non-Small Cell Lung Cancer (NSCLC)	E-cadherin (CDH1 )	mRNA	High
	Ovarian Cancer – Epithelial Ovarian Cancer/Fallopian Tube Cancer/Primary Peritoneal Cancer	40%	195	Xeloda®	Breast Cancer - Invasive	TP (TYMP)	mRNA	High
	Ovarian Cancer – Epithelial Ovarian Cancer/Fallopian Tube Cancer/Primary Peritoneal Cancer	40%	195	Taxotere®	Prostate Cancer	TUBB3	mRNA	High
	Ovarian Cancer – Epithelial Ovarian Cancer/Fallopian Tube Cancer/Primary Peritoneal Cancer	40%	195	Navelbine®	Non-Small Cell Lung Cancer (NSCLC)	TUBB3	mRNA	High
	Ovarian Cancer – Epithelial Ovarian Cancer/Fallopian Tube Cancer/Primary Peritoneal Cancer	40%	195	Erbitux®	Colon Cancer	E-cadherin (CDH1 )	mRNA	High
	Ovarian Cancer – Epithelial Ovarian Cancer/Fallopian Tube Cancer/Primary Peritoneal Cancer	40%	195	Taxol®	Ovarian Cancer – Epithelial Ovarian Cancer/Fallopian Tube Cancer/Primary Peritoneal Cancer	TUBB3	mRNA	High
	Ovarian Cancer – Epithelial Ovarian Cancer/Fallopian Tube Cancer/Primary Peritoneal Cancer	40%	195	Casodex®	Prostate Cancer	AR	IHC	Positive
	Ovarian Cancer – Epithelial Ovarian Cancer/Fallopian Tube Cancer/Primary Peritoneal Cancer	40%	195	None	Prostate Cancer	AR	IHC	Positive
	Ovarian Cancer – Epithelial Ovarian Cancer/Fallopian Tube Cancer/Primary Peritoneal Cancer	40%	195	Zytiga®	Prostate Cancer	AR	IHC	Positive
	Ovarian Cancer – Epithelial Ovarian Cancer/Fallopian Tube Cancer/Primary Peritoneal Cancer	40%	195	Provera®	Breast Cancer - Invasive	AR	IHC	Positive
	Ovarian Cancer – Epithelial Ovarian Cancer/Fallopian Tube Cancer/Primary Peritoneal Cancer	40%	195	Avastin®	Colon Cancer	CA IX	IHC	Negative
	Ovarian Cancer – Epithelial Ovarian Cancer/Fallopian Tube Cancer/Primary Peritoneal Cancer	40%	195	None	Breast Cancer - Invasive	CA IX	IHC	Negative
	Ovarian Cancer – Epithelial Ovarian Cancer/Fallopian Tube Cancer/Primary Peritoneal Cancer	40%	195	Ellence®	Breast Cancer - Invasive	CA IX	IHC	Negative
	Ovarian Cancer – Epithelial Ovarian Cancer/Fallopian Tube Cancer/Primary Peritoneal Cancer	40%	195	None	Rectal Cancer	CA IX	IHC	Negative
	Ovarian Cancer – Epithelial Ovarian Cancer/Fallopian Tube Cancer/Primary Peritoneal Cancer	40%	195	Afinitor®	Breast Cancer - Invasive	ER (ESR1)	IHC	Positive
	Ovarian Cancer – Epithelial Ovarian Cancer/Fallopian Tube Cancer/Primary Peritoneal Cancer	40%	195	Arimidex®	Breast Cancer - Invasive	ER (ESR1)	IHC	Positive
	Ovarian Cancer – Epithelial Ovarian Cancer/Fallopian Tube Cancer/Primary Peritoneal Cancer	40%	195	None	Breast Cancer - Invasive	ER (ESR1)	IHC	Positive
	Ovarian Cancer – Epithelial Ovarian Cancer/Fallopian Tube Cancer/Primary Peritoneal Cancer	40%	195	Femara®	Breast Cancer - Invasive	ER (ESR1)	IHC	Positive
	Ovarian Cancer – Epithelial Ovarian Cancer/Fallopian Tube Cancer/Primary Peritoneal Cancer	40%	195	Aromasin®	Breast Cancer - Invasive	ER (ESR1)	IHC	Positive
	Ovarian Cancer – Epithelial Ovarian Cancer/Fallopian Tube Cancer/Primary Peritoneal Cancer	40%	195	Fareston®	Breast Cancer - Invasive	ER (ESR1)	IHC	Positive
	Ovarian Cancer – Epithelial Ovarian Cancer/Fallopian Tube Cancer/Primary Peritoneal Cancer	40%	195	Faslodex®	Breast Cancer - Invasive	ER (ESR1)	IHC	Positive
	Ovarian Cancer – Epithelial Ovarian Cancer/Fallopian Tube Cancer/Primary Peritoneal Cancer	40%	195	Tykerb®	Breast Cancer - Invasive	HER2 (ERBB2)	IHC	Positive
	Ovarian Cancer – Epithelial Ovarian Cancer/Fallopian Tube Cancer/Primary Peritoneal Cancer	40%	195	Perjeta™	Breast Cancer - Invasive	HER2 (ERBB2)	IHC	Positive
	Ovarian Cancer – Epithelial Ovarian Cancer/Fallopian Tube Cancer/Primary Peritoneal Cancer	40%	195	Kadcyla™	Breast Cancer - Invasive	HER2 (ERBB2)	IHC	Positive
	Ovarian Cancer – Epithelial Ovarian Cancer/Fallopian Tube Cancer/Primary Peritoneal Cancer	40%	195	Temodar®	Central Nervous System Cancers - Glioblastoma	MGMT	IHC	Positive
	Ovarian Cancer – Epithelial Ovarian Cancer/Fallopian Tube Cancer/Primary Peritoneal Cancer	40%	195	BiCNU®	Central Nervous System Cancers - Glioblastoma	MGMT	IHC	Positive
	Ovarian Cancer – Epithelial Ovarian Cancer/Fallopian Tube Cancer/Primary Peritoneal Cancer	40%	195	Camptosar®	Ovarian Cancer – Epithelial Ovarian Cancer/Fallopian Tube Cancer/Primary Peritoneal Cancer	TOP1	IHC	Positive
	Ovarian Cancer – Epithelial Ovarian Cancer/Fallopian Tube Cancer/Primary Peritoneal Cancer	40%	195	Hycamtin® Injection	Ovarian Cancer – Epithelial Ovarian Cancer/Fallopian Tube Cancer/Primary Peritoneal Cancer	TOP1	IHC	Positive
	Ovarian Cancer – Epithelial Ovarian Cancer/Fallopian Tube Cancer/Primary Peritoneal Cancer	40%	195	Taxotere®	Prostate Cancer	TUBB3	IHC	Positive
	Ovarian Cancer – Epithelial Ovarian Cancer/Fallopian Tube Cancer/Primary Peritoneal Cancer	40%	195	Navelbine®	Non-Small Cell Lung Cancer (NSCLC)	TUBB3	IHC	Positive
	Ovarian Cancer – Epithelial Ovarian Cancer/Fallopian Tube Cancer/Primary Peritoneal Cancer	40%	195	Taxol®	Ovarian Cancer – Epithelial Ovarian Cancer/Fallopian Tube Cancer/Primary Peritoneal Cancer	TUBB3	IHC	Positive
	Ovarian Cancer – Epithelial Ovarian Cancer/Fallopian Tube Cancer/Primary Peritoneal Cancer	40%	195	Gemzar®	Pancreatic Adenocarcinoma	hENT1 (SLC29A1)	IHC	Positive
	Ovarian Cancer – Epithelial Ovarian Cancer/Fallopian Tube Cancer/Primary Peritoneal Cancer	40%	195		Breast Cancer - Invasive	ER (ESR1)	mRNA	Not Changed
	Ovarian Cancer – Epithelial Ovarian Cancer/Fallopian Tube Cancer/Primary Peritoneal Cancer	40%	195	Ibrance® + Faslodex®	Breast Cancer - Invasive	ER (ESR1)	IHC	Positive
	Ovarian Cancer – Epithelial Ovarian Cancer/Fallopian Tube Cancer/Primary Peritoneal Cancer	40%	195	Xtandi	Prostate Cancer	AR	IHC	Positive
	Ovarian Cancer – Epithelial Ovarian Cancer/Fallopian Tube Cancer/Primary Peritoneal Cancer	40%	195	Tecentriq	Bladder Cancer	PDL1 TILs	IHC	Positive
Case 16	Bladder Cancer - Primary Carcinoma of the Urethra	90%	480	Erbitux®	Colon Cancer	PIK3CA	DNA	c.1624G>A p.E542K; c.1633G>A p.E545K; c.1633G>C p.E545Q; c.1634A>C p.E545A; c.1634A>G p.E545G; c.1634A>T p.E545V; c.3140A>T p.H1047L; c.3140A>G p.H1047R
	Bladder Cancer - Primary Carcinoma of the Urethra	90%	480	Vectibix®	Colon Cancer	PIK3CA	DNA	c.1624G>A p.E542K; c.1633G>A p.E545K; c.1633G>C p.E545Q; c.1634A>C p.E545A; c.1634A>G p.E545G; c.1634A>T p.E545V; c.3140A>T p.H1047L; c.3140A>G p.H1047R
	Bladder Cancer - Primary Carcinoma of the Urethra	90%	480	Herceptin®	Breast Cancer - Invasive	PIK3CA	DNA	c.1624G>A p.E542K; c.1633G>A p.E545K; c.1633G>C p.E545Q; c.1634A>C p.E545A; c.1634A>G p.E545G; c.1634A>T p.E545V; c.3140A>T p.H1047L; c.3140A>G p.H1047R
Case 17	Pancreatic Adenocarcinoma	30%	16	Avastin®	Colon Cancer	CA IX	mRNA	High
	Pancreatic Adenocarcinoma	30%	16	Gemzar®	Pancreatic Adenocarcinoma	DCK	mRNA	High
	Pancreatic Adenocarcinoma	30%	16	Platinol®, Platinol®-AQ	Non-Small Cell Lung Cancer (NSCLC)	ERCC1	mRNA	High
	Pancreatic Adenocarcinoma	30%	16	None	Ovarian Cancer – Epithelial Ovarian Cancer/Fallopian Tube Cancer/Primary Peritoneal Cancer	ERCC1	mRNA	High
	Pancreatic Adenocarcinoma	30%	16	Eloxatin®	Colon Cancer	ERCC1	mRNA	High
	Pancreatic Adenocarcinoma	30%	16	None	Bone Cancer - Osteosarcoma	DHFR	mRNA	High
	Pancreatic Adenocarcinoma	30%	16	None	Non-Small Cell Lung Cancer (NSCLC)	DPD (DPYD)	mRNA	High
	Pancreatic Adenocarcinoma	30%	16	Herceptin®	Breast Cancer - Invasive	HER2 (ERBB2)	mRNA	High
	Pancreatic Adenocarcinoma	30%	16	Tykerb®	Breast Cancer - Invasive	HER2 (ERBB2)	mRNA	High
	Pancreatic Adenocarcinoma	30%	16	Perjeta™	Breast Cancer - Invasive	HER2 (ERBB2)	mRNA	High
	Pancreatic Adenocarcinoma	30%	16	None	Rectal Cancer	survivin (BIRC5)	mRNA	High
	Pancreatic Adenocarcinoma	30%	16	Platinol®, Platinol®-AQ	Bladder Cancer	survivin (BIRC5)	mRNA	High
	Pancreatic Adenocarcinoma	30%	16	None	Gastric Cancer	TS (TYMS)	mRNA	High
	Pancreatic Adenocarcinoma	30%	16	Alimta®	Mesothelioma Pleura	TS (TYMS)	mRNA	High
	Pancreatic Adenocarcinoma	30%	16	Erbitux®	Colon Cancer	KRAS	DNA	c.34G>T p.G12C; c.34G>C p.G12R; c.34G>A p.G12S; c.35G>C p.G12A; c.35G>A p.G12D; c.35G>T p.G12V; c.37G>T p.G13C; c.37G>C p.G13R; c.37G>A p.G13S; c.38G>C p.G13A; c.38G>A p.G13D; c.38G>T p.G13V; c.181C>A p.Q61K; c.182A>T p.Q61L; c.182_183AA>TG p.Q61L; c.182A>G p.Q61R; c.183A>C p.Q61H; c.183A>T p.Q61H; c.351A>C p.K117N; c.351A>T p.K117N; c.436G>C p.A146P; c.436G>A p.A146T; c.437C>T p.A146V; c.175G>A …
	Pancreatic Adenocarcinoma	30%	16	Vectibix®	Colon Cancer	KRAS	DNA	c.34G>T p.G12C; c.34G>C p.G12R; c.34G>A p.G12S; c.35G>C p.G12A; c.35G>A p.G12D; c.35G>T p.G12V; c.37G>T p.G13C; c.37G>C p.G13R; c.37G>A p.G13S; c.38G>C p.G13A; c.38G>A p.G13D; c.38G>T p.G13V; c.181C>A p.Q61K; c.182A>T p.Q61L; c.182_183AA>TG p.Q61L; c.182A>G p.Q61R; c.183A>C p.Q61H; c.183A>T p.Q61H; c.351A>C p.K117N; c.351A>T p.K117N; c.436G>C p.A146P; c.436G>A p.A146T; c.437C>T p.A146V
	Pancreatic Adenocarcinoma	30%	16	Taxol®	Non-Small Cell Lung Cancer (NSCLC)	TUBB3	mRNA	High
	Pancreatic Adenocarcinoma	30%	16	Taxotere®	Prostate Cancer	TUBB3	mRNA	High
	Pancreatic Adenocarcinoma	30%	16	Navelbine®	Non-Small Cell Lung Cancer (NSCLC)	TUBB3	mRNA	High
	Pancreatic Adenocarcinoma	30%	16	Kadcyla™	Breast Cancer - Invasive	HER2 (ERBB2)	mRNA	High
	Pancreatic Adenocarcinoma	30%	16	Yondelis	Soft Tissue Sarcoma - Alveolar Soft Part Sarcoma (ASPS)	ERCC1	mRNA	High
	Pancreatic Adenocarcinoma	30%	16	None	Rectal Cancer	CA IX	mRNA	High
	Pancreatic Adenocarcinoma	30%	16	Tarceva®	Non-Small Cell Lung Cancer (NSCLC)	KRAS	DNA	c.34G>T p.G12C; c.34G>C p.G12R; c.34G>A p.G12S; c.35G>C p.G12A; c.35G>A p.G12D; c.35G>T p.G12V; c.37G>T p.G13C; c.37G>C p.G13R; c.37G>A p.G13S; c.38G>C p.G13A; c.38G>A p.G13D; c.38G>T p.G13V; c.181C>A p.Q61K; c.182A>T p.Q61L; c.182_183AA>TG p.Q61L; c.182A>G p.Q61R; c.183A>C p.Q61H; c.183A>T p.Q61H; c.351A>C p.K117N; c.351A>T p.K117N; c.436G>C p.A146P; c.436G>A p.A146T; c.437C>T p.A146V
	Pancreatic Adenocarcinoma	30%	16	Afinitor®	Colon Cancer	KRAS	DNA	c.34G>T p.G12C; c.34G>C p.G12R; c.34G>A p.G12S; c.35G>C p.G12A; c.35G>A p.G12D; c.35G>T p.G12V; c.37G>T p.G13C; c.37G>C p.G13R; c.37G>A p.G13S; c.38G>C p.G13A; c.38G>A p.G13D; c.38G>T p.G13V; c.181C>A p.Q61K; c.182A>T p.Q61L; c.182_183AA>TG p.Q61L; c.182A>G p.Q61R; c.183A>C p.Q61H; c.183A>T p.Q61H; c.351A>C p.K117N; c.351A>T p.K117N; c.436G>C p.A146P; c.436G>A p.A146T; c.437C>T p.A146V
	Pancreatic Adenocarcinoma	30%	16		Breast Cancer - Invasive	HER2 (ERBB2)	mRNA	High
Case 18	Melanoma	90%	400	Erbitux®	Colon Cancer	BRAF	DNA	None Detected
	Melanoma	90%	400	Vectibix®	Colon Cancer	BRAF	DNA	None Detected
	Melanoma	90%	400	Zelboraf™	Melanoma	BRAF	DNA	None Detected
	Melanoma	90%	400	Erbitux®	Colon Cancer	NRAS	DNA	None Detected
	Melanoma	90%	400	Vectibix®	Colon Cancer	NRAS	DNA	None Detected
	Melanoma	90%	400	Tafinlar	Melanoma	BRAF	DNA	None Detected
	Melanoma	90%	400	Mekinist	Melanoma	BRAF	DNA	None Detected
	Melanoma	90%	400	Avastin®	Colon Cancer	CA IX	IHC	Negative
	Melanoma	90%	400	None	Breast Cancer - Invasive	CA IX	IHC	Negative
	Melanoma	90%	400	Ellence®	Breast Cancer - Invasive	CA IX	IHC	Negative
	Melanoma	90%	400	None	Rectal Cancer	CA IX	IHC	Negative
	Melanoma	90%	400	Camptosar®	Rectal Cancer	TOP1	IHC	Positive
	Melanoma	90%	400	Hycamtin® Injection	Ovarian Cancer – Epithelial Ovarian Cancer/Fallopian Tube Cancer/Primary Peritoneal Cancer	TOP1	IHC	Positive
	Melanoma	90%	400	Gemzar®	Pancreatic Adenocarcinoma	hENT1 (SLC29A1)	IHC	Negative
	Melanoma	90%	400	Xeloda®	Breast Cancer - Invasive	TP (TYMP)	IHC	Positive
	Melanoma	90%	400		Melanoma	PDL1 Tumor	IHC	Positive
	Melanoma	90%	400		Melanoma	BRAF	DNA	None Detected
	Melanoma	90%	400	Keytruda®	Non-Small Cell Lung Cancer (NSCLC)	PDL1 Tumor	IHC	Positive
	Melanoma	90%	400	Yervoy™	Melanoma	NRAS	DNA	None Detected
	Melanoma	90%	400		Melanoma	NRAS	DNA	None Detected
	Melanoma	90%	400	Keytruda®	Melanoma	NRAS	DNA	None Detected
	Melanoma	90%	400	Opdivo® + Yervoy®	Melanoma	BRAF	DNA	None Detected
	Melanoma	90%	400		Colon Cancer	NRAS	DNA	None Detected
	Melanoma	90%	400		Melanoma	BRAF	DNA	None Detected
	Melanoma	90%	400	Tecentriq	Bladder Cancer	PDL1 Tumor	IHC	Positive
Case 19	Breast Cancer - Invasive	55%	20	None	Prostate Cancer	AR	mRNA	High
	Breast Cancer - Invasive	55%	20	Platinol®, Platinol®-AQ	Non-Small Cell Lung Cancer (NSCLC)	ERCC1	mRNA	High
	Breast Cancer - Invasive	55%	20	Eloxatin®	Colon Cancer	ERCC1	mRNA	High
	Breast Cancer - Invasive	55%	20	None	Bone Cancer - Osteosarcoma	DHFR	mRNA	High
	Breast Cancer - Invasive	55%	20	Xeloda®	Colon Cancer	DPD (DPYD)	mRNA	High
	Breast Cancer - Invasive	55%	20	Platinol®, Platinol®-AQ	Bladder Cancer	survivin (BIRC5)	mRNA	High
	Breast Cancer - Invasive	55%	20	Erbitux®	Colon Cancer	PIK3CA	DNA	c.1624G>A p.E542K; c.1633G>A p.E545K; c.1633G>C p.E545Q; c.1634A>C p.E545A; c.1634A>G p.E545G; c.1634A>T p.E545V; c.3140A>T p.H1047L; c.3140A>G p.H1047R
	Breast Cancer - Invasive	55%	20	Vectibix®	Colon Cancer	PIK3CA	DNA	c.1624G>A p.E542K; c.1633G>A p.E545K; c.1633G>C p.E545Q; c.1634A>C p.E545A; c.1634A>G p.E545G; c.1634A>T p.E545V; c.3140A>T p.H1047L; c.3140A>G p.H1047R
	Breast Cancer - Invasive	55%	20	Ellence®	Breast Cancer - Invasive	TOPO IIa	mRNA	High
	Breast Cancer - Invasive	55%	20	None	Breast Cancer - Invasive	TOPO IIa	mRNA	High
	Breast Cancer - Invasive	55%	20	Herceptin®	Breast Cancer - Invasive	PIK3CA	DNA	c.1624G>A p.E542K; c.1633G>A p.E545K; c.1633G>C p.E545Q; c.1634A>C p.E545A; c.1634A>G p.E545G; c.1634A>T p.E545V; c.3140A>T p.H1047L; c.3140A>G p.H1047R
	Breast Cancer - Invasive	55%	20	Casodex®	Breast Cancer - Invasive	AR	mRNA	High
	Breast Cancer - Invasive	55%	20	Zytiga®	Prostate Cancer	AR	mRNA	High
	Breast Cancer - Invasive	55%	20	Provera®	Breast Cancer - Invasive	AR	mRNA	High
	Breast Cancer - Invasive	55%	20	None	Breast Cancer - Invasive	ERCC1	mRNA	High
	Breast Cancer - Invasive	55%	20	Yondelis	Soft Tissue Sarcoma - Alveolar Soft Part Sarcoma (ASPS)	ERCC1	mRNA	High
	Breast Cancer - Invasive	55%	20	Iressa®	Non-Small Cell Lung Cancer (NSCLC)	MYC	CNV	Gain
	Breast Cancer - Invasive	55%	20	Herceptin®	Breast Cancer - Invasive	ERBB3	mRNA	High
	Breast Cancer - Invasive	55%	20	None	Prostate Cancer	AR	IHC	Positive
	Breast Cancer - Invasive	55%	20	Casodex®	Breast Cancer - Invasive	AR	IHC	Positive
	Breast Cancer - Invasive	55%	20	Zytiga®	Prostate Cancer	AR	IHC	Positive
	Breast Cancer - Invasive	55%	20	Provera®	Breast Cancer - Invasive	AR	IHC	Positive
	Breast Cancer - Invasive	55%	20	Avastin®	Colon Cancer	CA IX	IHC	Negative
	Breast Cancer - Invasive	55%	20	None	Breast Cancer - Invasive	CA IX	IHC	Negative
	Breast Cancer - Invasive	55%	20	Ellence®	Breast Cancer - Invasive	CA IX	IHC	Negative
	Breast Cancer - Invasive	55%	20	Camptosar®	Rectal Cancer	TOP1	IHC	Positive
	Breast Cancer - Invasive	55%	20	Hycamtin® Injection	Ovarian Cancer – Epithelial Ovarian Cancer/Fallopian Tube Cancer/Primary Peritoneal Cancer	TOP1	IHC	Positive
	Breast Cancer - Invasive	55%	20		Breast Cancer - Invasive	ER (ESR1)	DNA	None Detected
	Breast Cancer - Invasive	55%	20		Breast Cancer - Invasive	ER (ESR1)	mRNA	Not Changed
	Breast Cancer - Invasive	55%	20		Breast Cancer - Invasive	PR (PGR)	mRNA	Not Changed
	Breast Cancer - Invasive	55%	20		Breast Cancer - Invasive	HER2 (ERBB2)	mRNA	Not Changed
	Breast Cancer - Invasive	55%	20		Breast Cancer - Invasive	HER2 (ERBB2)	CNV	None Detected
	Breast Cancer - Invasive	55%	20	Xtandi	Prostate Cancer	AR	IHC	Positive
Case 20	Pancreatic Adenocarcinoma	90	70	Platinol®, Platinol®-AQ	Breast Cancer - Invasive	BRCA1	mRNA	High
	Pancreatic Adenocarcinoma	90	70	Avastin®	Colon Cancer	CA IX	mRNA	High
	Pancreatic Adenocarcinoma	90	70	Gemzar®	Pancreatic Adenocarcinoma	DCK	mRNA	High
	Pancreatic Adenocarcinoma	90	70	Platinol®, Platinol®-AQ	Non-Small Cell Lung Cancer (NSCLC)	ERCC1	mRNA	High
	Pancreatic Adenocarcinoma	90	70	None	Ovarian Cancer – Epithelial Ovarian Cancer/Fallopian Tube Cancer/Primary Peritoneal Cancer	ERCC1	mRNA	High
	Pancreatic Adenocarcinoma	90	70	Eloxatin®	Colon Cancer	ERCC1	mRNA	High
	Pancreatic Adenocarcinoma	90	70	None	Rectal Cancer	survivin (BIRC5)	mRNA	High
	Pancreatic Adenocarcinoma	90	70	Platinol®, Platinol®-AQ	Bladder Cancer	survivin (BIRC5)	mRNA	High
	Pancreatic Adenocarcinoma	90	70	Xeloda®	Breast Cancer - Invasive	TP (TYMP)	mRNA	High
	Pancreatic Adenocarcinoma	90	70	Erbitux®	Colon Cancer	KRAS	DNA	c.34G>T p.G12C; c.34G>C p.G12R; c.34G>A p.G12S; c.35G>C p.G12A; c.35G>A p.G12D; c.35G>T p.G12V; c.37G>T p.G13C; c.37G>C p.G13R; c.37G>A p.G13S; c.38G>C p.G13A; c.38G>A p.G13D; c.38G>T p.G13V; c.181C>A p.Q61K; c.182A>T p.Q61L; c.182_183AA>TG p.Q61L; c.182A>G p.Q61R; c.183A>C p.Q61H; c.183A>T p.Q61H; c.351A>C p.K117N; c.351A>T p.K117N; c.436G>C p.A146P; c.436G>A p.A146T; c.437C>T p.A146V; c.175G>A …
	Pancreatic Adenocarcinoma	90	70	Vectibix®	Colon Cancer	KRAS	DNA	c.34G>T p.G12C; c.34G>C p.G12R; c.34G>A p.G12S; c.35G>C p.G12A; c.35G>A p.G12D; c.35G>T p.G12V; c.37G>T p.G13C; c.37G>C p.G13R; c.37G>A p.G13S; c.38G>C p.G13A; c.38G>A p.G13D; c.38G>T p.G13V; c.181C>A p.Q61K; c.182A>T p.Q61L; c.182_183AA>TG p.Q61L; c.182A>G p.Q61R; c.183A>C p.Q61H; c.183A>T p.Q61H; c.351A>C p.K117N; c.351A>T p.K117N; c.436G>C p.A146P; c.436G>A p.A146T; c.437C>T p.A146V
	Pancreatic Adenocarcinoma	90	70	Taxol®	Non-Small Cell Lung Cancer (NSCLC)	TUBB3	mRNA	High
	Pancreatic Adenocarcinoma	90	70	Taxotere®	Prostate Cancer	TUBB3	mRNA	High
	Pancreatic Adenocarcinoma	90	70	Navelbine®	Non-Small Cell Lung Cancer (NSCLC)	TUBB3	mRNA	High
	Pancreatic Adenocarcinoma	90	70	None	Rectal Cancer	CA IX	mRNA	High
	Pancreatic Adenocarcinoma	90	70	Tarceva®	Non-Small Cell Lung Cancer (NSCLC)	KRAS	DNA	c.34G>T p.G12C; c.34G>C p.G12R; c.34G>A p.G12S; c.35G>C p.G12A; c.35G>A p.G12D; c.35G>T p.G12V; c.37G>T p.G13C; c.37G>C p.G13R; c.37G>A p.G13S; c.38G>C p.G13A; c.38G>A p.G13D; c.38G>T p.G13V; c.181C>A p.Q61K; c.182A>T p.Q61L; c.182_183AA>TG p.Q61L; c.182A>G p.Q61R; c.183A>C p.Q61H; c.183A>T p.Q61H; c.351A>C p.K117N; c.351A>T p.K117N; c.436G>C p.A146P; c.436G>A p.A146T; c.437C>T p.A146V
	Pancreatic Adenocarcinoma	90	70	Afinitor®	Colon Cancer	KRAS	DNA	c.34G>T p.G12C; c.34G>C p.G12R; c.34G>A p.G12S; c.35G>C p.G12A; c.35G>A p.G12D; c.35G>T p.G12V; c.37G>T p.G13C; c.37G>C p.G13R; c.37G>A p.G13S; c.38G>C p.G13A; c.38G>A p.G13D; c.38G>T p.G13V; c.181C>A p.Q61K; c.182A>T p.Q61L; c.182_183AA>TG p.Q61L; c.182A>G p.Q61R; c.183A>C p.Q61H; c.183A>T p.Q61H; c.351A>C p.K117N; c.351A>T p.K117N; c.436G>C p.A146P; c.436G>A p.A146T; c.437C>T p.A146V
	Pancreatic Adenocarcinoma	90	70	Herceptin®	Breast Cancer - Invasive	ERBB3	mRNA	High
	Carcinoma of Unknown Primary	35%	50	Erbitux®	Colon Cancer	BRAF	DNA	None Detected
	Carcinoma of Unknown Primary	35%	50	Vectibix®	Colon Cancer	BRAF	DNA	None Detected
	Carcinoma of Unknown Primary	35%	50	Zelboraf™	Melanoma	BRAF	DNA	None Detected
	Carcinoma of Unknown Primary	35%	50	Erbitux®	Non-Melanoma Skin Cancers - Squamous Cell Skin Cancers	HRAS	DNA	None Detected
	Carcinoma of Unknown Primary	35%	50	Erbitux®	Colon Cancer	NRAS	DNA	None Detected
	Carcinoma of Unknown Primary	35%	50	Vectibix®	Colon Cancer	NRAS	DNA	None Detected
	Carcinoma of Unknown Primary	35%	50	Alimta®	Mesothelioma Pleura	TS (TYMS)	mRNA	High
	Carcinoma of Unknown Primary	35%	50	Erbitux®	Colon Cancer	PIK3CA	DNA	None Detected
	Carcinoma of Unknown Primary	35%	50	Vectibix®	Colon Cancer	PIK3CA	DNA	None Detected
	Carcinoma of Unknown Primary	35%	50	Erbitux®	Colon Cancer	KRAS	DNA	None Detected
	Carcinoma of Unknown Primary	35%	50	Vectibix®	Colon Cancer	KRAS	DNA	None Detected
	Carcinoma of Unknown Primary	35%	50	Taxotere®	Prostate Cancer	TUBB3	mRNA	High
	Carcinoma of Unknown Primary	35%	50	Navelbine®	Non-Small Cell Lung Cancer (NSCLC)	TUBB3	mRNA	High
	Carcinoma of Unknown Primary	35%	50	Tarceva®	Non-Small Cell Lung Cancer (NSCLC)	EGFR (ERBB1)	DNA	c.2573_2574TG>GT p.L858R; c.2573_2574TG>GA p.L858R; c.2572_2573CT>AG p.L858R; c.2573T>G p.L858R
	Carcinoma of Unknown Primary	35%	50	Tafinlar	Melanoma	BRAF	DNA	None Detected
	Carcinoma of Unknown Primary	35%	50	Mekinist	Melanoma	BRAF	DNA	None Detected
	Carcinoma of Unknown Primary	35%	50	Afinitor®	Colon Cancer	KRAS	DNA	None Detected
	Carcinoma of Unknown Primary	35%	50	Taxol®	Carcinoma of Unknown Primary	TUBB3	mRNA	High
	Carcinoma of Unknown Primary	35%	50	Avastin®	Colon Cancer	CA IX	IHC	Negative
	Carcinoma of Unknown Primary	35%	50	None	Breast Cancer - Invasive	CA IX	IHC	Negative
	Carcinoma of Unknown Primary	35%	50	Ellence®	Breast Cancer - Invasive	CA IX	IHC	Negative
	Carcinoma of Unknown Primary	35%	50	Camptosar®	Rectal Cancer	TOP1	IHC	Positive
	Carcinoma of Unknown Primary	35%	50	Hycamtin® Injection	Ovarian Cancer – Epithelial Ovarian Cancer/Fallopian Tube Cancer/Primary Peritoneal Cancer	TOP1	IHC	Positive
	Carcinoma of Unknown Primary	35%	50	Gemzar®	Pancreatic Adenocarcinoma	hENT1 (SLC29A1)	IHC	Negative
	Carcinoma of Unknown Primary	35%	50	Caprelsa® + Taxotere®	Non-Small Cell Lung Cancer (NSCLC)	EGFR (ERBB1)	DNA	c.2156G>C p.G719A; c.2155G>A p.G719S; c.2155G>T p.G719C; c.2303G>T p.S768I; c.2307_2308ins9 p.V769_D770insASV; c.2319_2320insCAC p.H773_V774insH; c.2310_2311insGGT p.D770_N771insG; c.2235_2249del15 p.E746_A750del; c.2235_2252>AAT p.E746_T751>I; c.2236_2253del18 p.E746_T751del; c.2237_2251del15 p.E746_T751>A; c.2237_2254del18 p.E746_S752>A; c.2237_2255>T p.E746_S752>V; c.2236_2250del15 p.E746_A750…
	Carcinoma of Unknown Primary	35%	50	Gilotrif	Non-Small Cell Lung Cancer (NSCLC)	EGFR (ERBB1)	DNA	c.2573_2574TG>GT p.L858R; c.2573_2574TG>GA p.L858R; c.2572_2573CT>AG p.L858R; c.2573T>G p.L858R
	Carcinoma of Unknown Primary	35%	50		Breast Cancer - Invasive	PIK3CA	DNA	None Detected
	Carcinoma of Unknown Primary	35%	50		Colon Cancer	BRAF	DNA	None Detected
	Carcinoma of Unknown Primary	35%	50		Colon Cancer	NRAS	DNA	None Detected
	Carcinoma of Unknown Primary	35%	50		Colon Cancer	KRAS	DNA	None Detected
	Carcinoma of Unknown Primary	35%	50	Iressa®	Carcinoma of Unknown Primary	EGFR (ERBB1)	DNA	c.2573_2574TG>GT p.L858R; c.2573_2574TG>GA p.L858R; c.2572_2573CT>AG p.L858R; c.2573T>G p.L858R
	Carcinoma of Unknown Primary	35%	50	Keytruda®	Non-Small Cell Lung Cancer (NSCLC)	PD-L1 (22C3) Tumor	IHC	Low
	Carcinoma of Unknown Primary	35%	50		Non-Small Cell Lung Cancer (NSCLC)	PD-L1 (22C3) Tumor	IHC	Low
	Carcinoma of Unknown Primary	35%	50	Tecentriq	Non-Small Cell Lung Cancer (NSCLC)	PD-L1 (22C3) Tumor	IHC	Low
	Carcinoma of Unknown Primary	35%	50	Tecentriq	Kidney Cancer	PD-L1 (22C3) TILs	IHC	Low
	Carcinoma of Unknown Primary	35%	50	BAVENCIO	Non-Melanoma Skin Cancers - Merkel Cell Carcinoma	PD-L1 (22C3) Tumor	IHC	Low
