# Supplementary material for: Performance of next-generation sequencing on small tumor specimens and/or low tumor content samples using a commercially available platform
Source: PLoS One. 2018 Apr 27;13(4):e0196556. doi: 10.1371/journal.pone.0196556 (PMC5922576; doi:10.1371/journal.pone.0196556)
Supplement: S2 Table — (XLSX) [file pone.0196556.s002.xlsx]

## Sheet: analysis data.csv
	Note 1: cases without "values" in columns K-N were not included in many analyses that required knowing this value.
	Note 2: the 24 cases with no tissue in the block received are not listed in this table as none of these metrics were collected.
Case Number	Cancer Type	% Tumor	Tissue area mm^2	DNA curl area mm^2	RNA curl area mm^2	IHCs ordered	IHCs with results	% IHC results	NGS Ordered	CNVAllNonPassValue	mRNAAllNonPassValue	mRNAQCValue	MutationQCValue	Drug associations	Low coverage
1	Colon Cancer	10	80	480	480	0	0		Yes					9	0
2	Bladder Cancer	10	280	560	560	0	0		Yes					7	0
3	Non-Melanoma Skin Cancers - Squamous Cell Skin Cancers	80	10	500	500	0	0		Yes					1	0
4	Non-Small Cell Lung Cancer (NSCLC)	65	80	480	0	0	0		No					0	0
5	Central Nervous System Cancers - Low grade astrocytoma	20	154	616	616	0	0		Yes					20	0
6	Central Nervous System Cancers - Low grade astrocytoma	20	56	448	448	0	0		Yes					20	0
7	Carcinoma of Unknown Primary	70	60	480	480	0	0		Yes					19	0
8	Melanoma	90	77	462	462	0	0		Yes					3	0
9	Breast Cancer - Invasive	65	21	504	504	0	0		Yes					8	0
10	Pancreatic Adenocarcinoma	1	500	1000	1000	0	0		No					0	0
11	Breast Cancer - Invasive	80	38	266	266	0	0		Yes					20	0
12	Colon Cancer	30	15	255	0	0	0		Yes					5	0
13	Breast Cancer - Invasive	25	196	392	392	0	0		Yes					4	0
14	Non-Small Cell Lung Cancer (NSCLC)	45	2	12	0	0	0		No					0	0
15	Non-Small Cell Lung Cancer (NSCLC)	50	132	528	528	0	0		Yes					13	0
16	Hepatobiliary Cancers - Extrahepatic Cholangiocarcinoma	10	506	1012	1012	0	0		Yes					9	0
17	Kidney Cancer	70	210	420	420	0	0		No					0	0
18	Kidney Cancer	60	255	510	510	0	0		Yes					10	0
19	Non-Small Cell Lung Cancer (NSCLC)	20	70	560	560	0	0		Yes					7	0
20	Synovial Sarcoma	90	35	385	385	0	0		Yes					2	0
21	Synovial Sarcoma	99	336	672	672	0	0		Yes					0	0
22	Cervical Cancer	50	25	350	250	0	0		No					0	0
23	Cervical Cancer	70	300	600	600	0	0		Yes					4	0
24	Carcinoma of Unknown Primary	65	460	920	920	0	0		Yes					18	0
25	Hepatobiliary Cancers - Intrahepatic Cholangiocarcinoma	80	95	570	570	0	0		Yes					2	0
26	Head and Neck Cancers - Cancer of the Oral Cavity	80	308	616	616	0	0		Yes					0	0
27	Small Cell Lung Cancer (SCLC)	60	54	540	540	0	0		Yes					5	0
28	Soft Tissue Sarcoma - Alveolar Soft Part Sarcoma (ASPS)	80	221	442	442	0	0		Yes					4	0
29	Neuroblastoma	40	105	420	420	0	0		Yes					10	0
30	Head and Neck Cancers - Cancer of the Oropharynx	40	28	336	504	0	0		Yes					5	0
31	Colon Cancer	60	56	448	448	0	0		Yes					22	0
32	Malignant fibrous histiocytoma	40	6	252	60	0	0		Yes					0	0
33	Non-Small Cell Lung Cancer (NSCLC)	20	36	504	504	0	0		Yes					6	0
34	Head and Neck Cancers - Cancer of the Oropharynx	30	56	448	336	0	0		Yes					10	0
35	Breast Cancer - Invasive	50	342	684	684	0	0		Yes					13	0
36	Bladder Cancer	90	121	484	484	0	0		Yes					14	0
37	Germ Cell Tumors	80	208	416	416	0	0		Yes					10	0
38	Esophageal and Esophagogastric Junction Cancers	60	225	450	450	0	0		Yes					12	0
39	Rectal Cancer	20	42	504	504	0	0		Yes					10	0
40	Pancreatic Adenocarcinoma	30	180	360	360	0	0		Yes					5	0
41	Non-Small Cell Lung Cancer (NSCLC)	60	81	486	486	0	0		Yes					14	0
42	Solid Tumors	80	252	504	504	0	0		Yes					10	0
43	Hepatobiliary Cancers - Hepatocellular Carcinoma	50	121	484	484	0	0		Yes					3	0
44	Non-Small Cell Lung Cancer (NSCLC)	50	63	504	504	0	0		Yes					17	0
45	Ovarian Cancer – Epithelial Ovarian Cancer/Fallopian Tube Cancer/Primary Peritoneal Cancer	90	336	672	672	0	0		Yes					9	0
46	Non-Small Cell Lung Cancer (NSCLC)	20	361	722	722	0	0		Yes					25	0
47	Non-Small Cell Lung Cancer (NSCLC)	80	96	576	288	0	0		Yes					23	0
48	Non-Small Cell Lung Cancer (NSCLC)	50	192	384	384	0	0		Yes					23	0
49	Malignant fibrous histiocytoma	85	182	364	364	0	0		Yes					5	0
50	Central Nervous System Cancers - Adult Intracranial Ependymoma (excludes subependymoma and myxopapillary)	80	396	792	792	0	0		Yes					17	0
51	Carcinoma of Unknown Primary	80	144	576	576	0	0		Yes					23	0
52	Soft Tissue Sarcoma - Retroperitoneal/ Intra-abdominal	80	308	616	616	0	0		Yes					0	0
53	Pancreatic Adenocarcinoma	50	153	612	612	0	0		Yes					8	0
54	Rectal Cancer	70	300	600	600	0	0		Yes					18	0
55	Prostate Cancer	65	180	360	360	0	0		Yes					7	0
56	Colon Cancer	20	169	338	338	0	0		Yes					27	0
57	Head and Neck Cancers - Cancer of the Oropharynx	60	228	456	456	0	0		Yes					4	0
58	Thymomas and Thymic Carcinomas	80	85	510	510	0	0		Yes					8	0
59	Bladder Cancer	60	221	442	442	0	0		Yes					10	0
60	Colon Cancer	70	448	896	896	0	0		Yes					15	0
61	Melanoma	90	12	504	504	0	0		Yes					13	0
62	Non-Small Cell Lung Cancer (NSCLC)	25	48	1248	480	0	0		Yes					5	0
63	Colon Cancer	50	45	540	540	0	0		Yes					25	0
64	Non-Small Cell Lung Cancer (NSCLC)	50	130	520	520	0	0		Yes					23	0
65	Non-Small Cell Lung Cancer (NSCLC)	40	15	345	180	0	0		Yes					18	0
66	Hepatobiliary Cancers - Extrahepatic Cholangiocarcinoma	50	90	540	540	0	0		Yes					0	0
67	Colon Cancer	25	234	468	468	0	0		Yes					19	0
68	Adenoid cystic carcinoma	90	132	528	528	0	0		Yes					0	0
69	Solid Tumors	90	195	390	390	0	0		Yes					13	0
70	Non-Small Cell Lung Cancer (NSCLC)	80	160	640	640	0	0		Yes					26	0
71	Pancreatic Adenocarcinoma	25	60	480	480	0	0		Yes					27	0
72	Prostate Cancer	30	6	252	234	0	0		Yes					17	0
73	Central Nervous System Cancers - Adult Intracranial Ependymoma (excludes subependymoma and myxopapillary)	70	460	920	920	0	0		Yes					16	0
74	Small Cell Lung Cancer (SCLC)	60	115	460	460	0	0		Yes					12	0
75	Bladder Cancer	50	210	420	420	0	0		Yes					23	0
76	Liposarcoma	99	80	480	480	0	0		Yes					4	0
77	Carcinoma of Unknown Primary	80	195	390	390	0	0		Yes					19	0
78	Breast Cancer - Invasive	80	112	448	448	0	0		Yes					30	0
79	Melanoma	60	10	80	0	0	0		Yes					5	0
80	Non-Small Cell Lung Cancer (NSCLC)	20	12	252	84	0	0		Yes					21	0
81	Non-Small Cell Lung Cancer (NSCLC)	20	1	88	0	0	0		No					0	0
82	Adenoid cystic carcinoma	80	6	252	54	0	0		Yes					0	0
83	Breast Cancer - Invasive	80	44	528	528	0	0		Yes					13	0
84	Kidney Cancer	75	56	448	448	0	0		Yes					11	0
85	Non-Small Cell Lung Cancer (NSCLC)	40	187	374	374	0	0		Yes					20	0
86	Breast Cancer - Invasive	60	252	504	504	0	0		Yes					8	0
87	Uterine Neoplasms - Endometrial Carcinoma	70	10	500	500	0	0		Yes					8	0
88	Salivary duct carcinoma	75	14	406	0	0	0		Yes					0	0
89	Thyroid Carcinoma - Papillary Carcinoma	90	312	624	624	0	0		Yes					12	0
90	Solid Tumors	90	368	736	736	0	0		Yes					3	0
91	Non-Small Cell Lung Cancer (NSCLC)	40	63	504	504	0	0		Yes					16	0
92	Thymomas and Thymic Carcinomas	90	80	480	480	0	0		Yes					8	0
93	Carcinoma of Unknown Primary	30	528	1056	1056	0	0		Yes					19	0
94	Bladder Cancer	60	120	480	480	0	0		Yes					16	0
95	Germ Cell Tumors	30	504	1008	1008	0	0		Yes					9	0
96	Neuroendocrine Tumors - Neuroendocrine Tumors of the Pancreas (Islet Cell Tumors)	30	105	420	420	0	0		Yes					8	0
97	Melanoma	90	121	484	484	0	0		Yes					15	0
98	Colon Cancer	30	50	500	500	0	0		Yes					20	0
99	Carcinoma of Unknown Primary	30	169	0	845	0	0		No					0	0
100	Pancreatic Adenocarcinoma	30	126	504	504	0	0		Yes					11	0
101	Breast Cancer - Invasive	80	46	460	460	0	0		Yes					10	0
102	Breast Cancer - Invasive	10	32	512	512	0	0		Yes					8	0
103	Carcinoma of Unknown Primary	20	100	600	600	0	0		Yes					13	0
104	Neuroendocrine Tumors - Neuroendocrine Tumors of the GI Tract, Lung, and Thymus	80	40	480	480	0	0		Yes					5	0
105	Carcinoma of Unknown Primary	30	368	736	736	0	0		Yes					18	0
106	Colon Cancer	30	322	644	644	0	0		Yes					14	0
107	Colon Cancer	30	150	600	600	0	0		Yes					16	0
108	Neuroendocrine Tumors - Neuroendocrine Tumors of the Pancreas (Islet Cell Tumors)	75	120	480	480	0	0		Yes					5	0
109	Soft Tissue Sarcoma of the Extremity/Trunk	90	540	1080	1080	0	0		Yes					12	0
110	Non-Small Cell Lung Cancer (NSCLC)	30	60	480	480	0	0		Yes					20	0
111	Non-Small Cell Lung Cancer (NSCLC)	30	132	528	528	0	0		Yes					18	0
112	Hepatobiliary Cancers - Hepatocellular Carcinoma	80	72	432	432	0	0		Yes					2	0
113	Bladder Cancer	30	190	380	380	0	0		No					0	0
114	Non-Small Cell Lung Cancer (NSCLC)	30	54	324	270	0	0		Yes					19	0
115	Melanoma	50	336	672	672	0	0		Yes					14	0
116	Soft Tissue Sarcoma of the Extremity/Trunk	60	84	504	504	0	0		Yes					12	0
117	Osteosarcoma	80	54	540	540	0	0		Yes					0	0
118	non-small Cell Lung Cancer (NSCLC)	70	72	432	432	0	0		Yes					25	0
119	Non-Small Cell Lung Cancer (NSCLC)	40	21	252	0	0	0		Yes					12	0
120	Colon Cancer	60	270	540	540	0	0		Yes					26	0
121	Gastric Cancer	30	50	500	500	0	0		Yes					9	0
122	Thymomas and Thymic Carcinomas	90	120	480	480	0	0		Yes					0	0
123	Thymomas and Thymic Carcinomas	90	225	450	450	0	0		Yes					11	0
124	Mesothelioma Pleura	50	272	544	544	0	0		Yes					4	0
125	Non-Small Cell Lung Cancer (NSCLC)	50	36	504	504	0	0		Yes					21	0
126	Non-Small Cell Lung Cancer (NSCLC)	30	4	84	0	0	0		Yes					12	0
127	Adenoid cystic carcinoma	90	100	600	600	0	0		Yes					1	0
128	Non-Small Cell Lung Cancer (NSCLC)	50	140	560	560	0	0		Yes					23	0
129	Non-Small Cell Lung Cancer (NSCLC)	5	90	540	540	0	0		Yes					21	0
130	Non-Small Cell Lung Cancer (NSCLC)	10	6	150	0	0	0		Yes					12	0
131	Carcinoma of Unknown Primary	5	18	504	0	0	0		Yes					8	0
132	Colon Cancer	30	72	432	432	0	0		Yes					16	0
133	Breast Cancer - Invasive	60	266	532	532	0	0		Yes					13	0
134	Non-Small Cell Lung Cancer (NSCLC)	10	119	476	476	0	0		Yes					20	0
135	Non-Small Cell Lung Cancer (NSCLC)	60	238	476	476	0	0		Yes					17	0
136	Non-Small Cell Lung Cancer (NSCLC)	60	40	480	480	0	0		Yes					18	0
137	Non-Small Cell Lung Cancer (NSCLC)	60	270	540	540	0	0		Yes					22	0
138	Carcinoma of Unknown Primary	90	52	520	520	0	0		Yes					20	0
139	Ovarian Cancer – Epithelial Ovarian Cancer/Fallopian Tube Cancer/Primary Peritoneal Cancer	35	561	1122	1122	0	0		Yes					8	0
140	Non-Small Cell Lung Cancer (NSCLC)	25	22	0	198	0	0		Yes					9	0
141	mesothelioma Pleura	60	80	480	480	0	0		Yes					9	0
142	Non-Small Cell Lung Cancer (NSCLC)	30	10	250	210	0	0		Yes					17	0
143	Non-Small Cell Lung Cancer (NSCLC)	70	91	546	546	0	0		Yes					25	0
144	Non-Small Cell Lung Cancer (NSCLC)	50	152	608	608	0	0		Yes					27	0
145	Non-Small Cell Lung Cancer (NSCLC)	30	72	432	432	0	0		Yes					17	0
146	Breast Cancer - Invasive	80	48	480	480	0	0		Yes					12	0
147	Kidney Cancer	80	368	736	736	0	0		Yes					15	0
148	Uterine Neoplasms - Endometrial Carcinoma	50	380	760	760	0	0		Yes					16	0
149	Non-Small Cell Lung Cancer (NSCLC)	80	551	1102	1102	0	0		Yes					26	0
150	Neuroendocrine Tumors - Pheochromocytoma/Paraganglioma	80	216	432	432	0	0		Yes					7	0
151	Breast Cancer - Invasive	20	20	520	520	0	0		Yes					7	0
152	Pancreatic Adenocarcinoma	40	96	288	480	0	0		Yes					4	0
153	Ovarian Cancer – Epithelial Ovarian Cancer/Fallopian Tube Cancer/Primary Peritoneal Cancer	70	136	544	544	0	0		Yes					14	0
154	Colon Cancer	40	80	480	480	0	0		Yes					34	0
155	Breast Cancer - Invasive	30	221	442	442	0	0		Yes					6	0
156	Carcinoma of Unknown Primary	80	486	972	972	0	0		Yes					35	0
157	Hepatobiliary Cancers - Intrahepatic Cholangiocarcinoma	30	54	540	540	0	0		Yes					1	0
158	Gastric Cancer	50	456	912	912	0	0		Yes					3	0
159	Esophageal and Esophagogastric Junction Cancers	20	260	520	520	0	0		Yes					3	0
160	Non-Small Cell Lung Cancer (NSCLC)	25	16	224	0	0	0		Yes					10	0
161	Breast Cancer - Invasive	80	32	256	448	0	0		Yes					7	0
162	Non-Small Cell Lung Cancer (NSCLC)	50	399	798	798	0	0		Yes					19	0
163	Liposarcoma	90	442	884	884	0	0		Yes					11	0
164	Neuroendocrine Tumors - Neuroendocrine Tumors of the GI Tract, Lung, and Thymus	80	465	930	930	0	0		Yes					10	0
165	Non-Small Cell Lung Cancer (NSCLC)	50	6	252	60	0	0		Yes					12	0
166	Uterine Neoplasms - Endometrial Carcinoma	40	336	672	672	0	0		Yes					4	0
167	Cervical Cancer	75	441	882	882	0	0		Yes					16	0
168	Rectal Cancer	50	198	396	396	0	0		Yes					13	0
169	Non-Small Cell Lung Cancer (NSCLC)	60	40	240	240	0	0		Yes					16	0
170	Ampulla of Vater	35	544	1088	1088	0	0		Yes					4	0
171	Colon Cancer	60	110	440	440	0	0		Yes					28	0
172	Breast Cancer - Invasive	40	210	420	420	0	0		Yes					16	0
173	Breast Cancer - Invasive	65	54	270	540	0	0		Yes					19	0
174	Pancreatic Adenocarcinoma	30	195	390	390	0	0		Yes					11	0
175	Carcinoma of Unknown Primary	80	270	540	540	0	0		Yes					27	0
176	Esophageal and Esophagogastric Junction Cancers	30	147	588	588	0	0		Yes					4	0
177	Chondrosarcoma	50	418	836	836	0	0		Yes					8	0
178	Colon Cancer	50	238	2380	2380	0	0		Yes					11	0
179	Esophageal and Esophagogastric Junction Cancers	90	294	588	588	0	0		Yes					15	0
180	Breast Cancer - Invasive	80	323	646	646	0	0		Yes					6	0
181	Salivary duct carcinoma	80	72	432	432	0	0		Yes					16	0
182	Colon Cancer	10	240	480	480	0	0		Yes					21	0
183	Non-Small Cell Lung Cancer (NSCLC)	60	110	440	440	0	0		Yes					20	0
184	Non-Small Cell Lung Cancer (NSCLC)	90	156	624	624	0	0		Yes					24	0
185	Chondrosarcoma	90	323	646	646	0	0		Yes					2	0
186	Thyroid Carcinoma - Anaplastic Carcinoma	95	272	544	544	0	0		Yes					8	0
187	Salivary duct carcinoma	80	150	600	600	0	0		Yes					21	0
188	Colon Cancer	70	323	646	646	0	0		Yes					19	0
189	Uterine Neoplasms - Endometrial Carcinoma	90	36	612	432	0	0		Yes					15	0
190	Non-Small Cell Lung Cancer (NSCLC)	90	238	476	476	0	0		Yes					32	0
191	Colon Cancer	90	506	1012	1012	0	0		Yes					12	0
192	Breast Cancer - Invasive	80	195	390	390	0	0		Yes					25	0
193	Melanoma	90	126	504	504	0	0		Yes					7	0
194	Mesothelioma Pleura	80	15	510	510	0	0		Yes					6	0
195	Carcinoma of Unknown Primary	15	3	99	0	0	0		No					0	0
196	Central Nervous System Cancers - Glioblastoma	30	168	336	336	0	0		Yes					12	0
197	Esophageal and Esophagogastric Junction Cancers	50	300	600	600	0	0		Yes					19	0
198	Non-Small Cell Lung Cancer (NSCLC)	5	12	504	504	0	0		Yes					16	0
199	Merkel Cell Carcinoma	70	63	504	504	0	0		Yes					17	0
200	Non-Small Cell Lung Cancer (NSCLC)	5	48	480	480	0	0		Yes					22	0
201	Osteosarcoma	50	435	870	870	0	0		Yes					5	0
202	Non-Small Cell Lung Cancer (NSCLC)	50	165	660	660	0	0		Yes					20	0
203	Non-Small Cell Lung Cancer (NSCLC)	1	280	560	560	0	0		Yes					11	0
204	Non-Small Cell Lung Cancer (NSCLC)	60	465	930	930	0	0		Yes					22	0
205	Thyroid Carcinoma - Hürthle Cell Carcinoma	75	156	624	624	0	0		Yes					2	0
206	Uterine Neoplasms - Endometrial Carcinoma	10	432	864	864	0	0		Yes					14	0
207	Ovarian Cancer – Epithelial Ovarian Cancer/Fallopian Tube Cancer/Primary Peritoneal Cancer	30	456	912	912	0	0		Yes					16	0
208	Colon Cancer	30	374	748	748	0	0		Yes					10	0
209	Neuroendocrine Tumors - Adrenal Gland Tumors	85	399	798	798	15	13	0.866667	Yes					16	0
210	Thyroid Carcinoma - Anaplastic Carcinoma	80	36	360	504	0	0		Yes					12	0
211	Neuroendocrine Tumors - Neuroendocrine Tumors of the GI Tract, Lung, and Thymus	50	272	544	544	0	0		Yes					2	0
212	Colon Cancer	50	396	792	792	0	0		Yes					21	0
213	Mesothelioma Pleura	30	560	1120	1120	0	0		Yes					7	0
214	Melanoma	50	360	720	720	0	0		Yes					16	0
215	Carcinoma of Unknown Primary	1	1	8	0	0	0		No					0	0
216	Kidney Cancer	60	324	648	648	0	0		Yes					14	0
217	Colon Cancer	30	399	798	798	0	0		Yes					18	0
218	Non-Melanoma Skin Cancers - Squamous Cell Skin Cancers	80	60	360	600	0	0		Yes					10	0
219	Carcinoid tumor	90	196	392	392	0	0		Yes					8	0
220	Non-Small Cell Lung Cancer (NSCLC)	30	288	576	576	0	0		Yes					27	0
221	Carcinoma of Unknown Primary	20	187	374	374	3	2	0.666667	Yes					20	0
222	Non-Small Cell Lung Cancer (NSCLC)	70	336	672	672	0	0		Yes					20	0
223	Pancreatic Adenocarcinoma	45	399	798	798	0	0		Yes					12	0
224	Carcinoma of Unknown Primary	70	726	1452	1452	0	0		Yes					17	0
225	Non-Small Cell Lung Cancer (NSCLC)	30	70	420	420	0	0		Yes					14	0
226	Pancreatic Adenocarcinoma	50	126	630	378	0	0		Yes					4	0
227	Bladder Cancer	85	651	1302	1302	15	13	0.866667	Yes					29	0
228	Colon Cancer	40	21	504	504	21	17	0.809524	Yes					14	0
229	Ovarian Cancer – Epithelial Ovarian Cancer/Fallopian Tube Cancer/Primary Peritoneal Cancer	50	270	540	540	0	0		Yes					15	0
230	Non-Small Cell Lung Cancer (NSCLC)	30	432	864	864	0	0		Yes					16	0
231	Prostate Cancer	60	70	560	560	15	13	0.866667	Yes					16	0
232	Colon Cancer	30	374	748	748	0	0		Yes					24	0
233	Chondrosarcoma	90	152	608	608	0	0		Yes					2	0
234	Non-Small Cell Lung Cancer (NSCLC)	30	456	912	912	0	0		Yes					22	0
235	Gastric Cancer	40	120	480	480	0	0		Yes					12	0
236	Ovarian Cancer – Epithelial Ovarian Cancer/Fallopian Tube Cancer/Primary Peritoneal Cancer	80	208	416	416	0	0		Yes					12	0
237	Mesothelioma Peritoneal	75	352	704	704	0	0		Yes					8	0
238	Gastric Cancer	50	171	342	342	15	14	0.933333	Yes					16	0
239	Carcinoma of Unknown Primary	70	216	432	432	0	0		Yes					18	0
240	Small Cell Lung Cancer (SCLC)	10	117	468	468	0	0		Yes					11	0
241	Colon Cancer	60	144	432	288	0	0		Yes					7	0
242	Non-Small Cell Lung Cancer (NSCLC)	55	160	640	640	0	0		Yes					16	0
243	Carcinoid tumor	95	99	594	594	0	0		Yes					9	0
244	Small intestine cancer	30	198	396	396	15	13	0.866667	Yes					12	0
245	Non-Melanoma Skin Cancers - Squamous Cell Skin Cancers	1	400	800	800	0	0		No					0	0
246	Non-Small Cell Lung Cancer (NSCLC)	50	28	504	728	15	0	0	Yes					24	0
247	Carcinoma of Unknown Primary	60	528	1056	1056	15	12	0.8	Yes					25	0
248	Carcinoma of Unknown Primary	50	168	336	336	0	0		Yes					8	0
249	Non-Small Cell Lung Cancer (NSCLC)	70	308	616	616	0	0		Yes					21	0
250	Non-Small Cell Lung Cancer (NSCLC)	20	221	442	442	0	0		Yes					20	0
251	Non-Small Cell Lung Cancer (NSCLC)	60	805	1610	1610	0	0		Yes					20	0
252	Breast Cancer - Invasive	50	220	440	440	0	0		Yes					9	0
253	Ovarian Cancer – Epithelial Ovarian Cancer/Fallopian Tube Cancer/Primary Peritoneal Cancer	20	110	440	440	15	14	0.933333	Yes					25	0
254	Head and Neck Cancers - Cancer of the Oropharynx	30	54	540	540	0	0		Yes					7	0
255	Mesothelioma Pleura	60	308	616	616	0	0		Yes					3	0
256	Colon Cancer	60	133	532	532	21	19	0.904762	Yes					29	0
257	Colon Cancer	60	28	252	252	21	0	0	Yes					40	0
258	Breast Cancer - Invasive	60	48	480	480	0	0		Yes					12	0
259	Non-Small Cell Lung Cancer (NSCLC)	20	99	594	594	15	11	0.733333	Yes					23	0
260	Breast Cancer - Invasive	2	150	600	600	15	0	0	Yes					19	0
261	Breast Cancer - Invasive	90	238	476	476	12	11	0.916667	Yes					27	0
262	Melanoma	70	440	880	880	15	15	1	Yes					22	0
263	Carcinoma of Unknown Primary	90	256	1024	1024	0	0		Yes					27	0
264	Germ Cell Tumors	80	336	672	672	0	0		Yes					3	0
265	Non-Small Cell Lung Cancer (NSCLC)	20	192	384	384	0	0		Yes					12	0
266	Bladder Cancer	60	660	3960	3960	15	14	0.933333	Yes					17	0
267	Breast Cancer - Invasive	90	364	2184	2184	15	14	0.933333	Yes					19	0
268	Hepatobiliary Cancers - Hepatocellular Carcinoma	80	693	1386	1386	15	14	0.933333	Yes					22	0
269	Colon Cancer	50	56	448	448	0	0		Yes					16	0
270	Pancreatic Adenocarcinoma	45	294	588	588	0	0		Yes					11	0
271	Pancreatic Adenocarcinoma	60	315	630	630	0	0		Yes					9	0
272	Breast Cancer - Invasive	50	150	600	600	0	0		Yes					12	0
273	Carcinoma of Unknown Primary	40	72	432	432	0	0		Yes					17	0
274	Uterine Neoplasms - Endometrial Carcinoma	30	660	1320	1320	0	0		Yes					9	0
275	Hepatobiliary Cancers - Hepatocellular Carcinoma	30	468	936	936	21	16	0.761905	Yes					22	0
276	Hepatobiliary Cancers - Intrahepatic Cholangiocarcinoma	60	84	504	504	0	0		Yes					3	0
277	Neuroendocrine Tumors - Neuroendocrine Tumors of the GI Tract, Lung, and Thymus	90	375	750	750	0	0		Yes					11	0
278	Central Nervous System Cancers - Glioblastoma	50	180	360	360	0	0		Yes					7	0
279	Soft Tissue Sarcoma of the Extremity/Trunk	80	221	442	442	0	0		Yes					6	0
280	Colon Cancer	30	120	480	480	0	0		Yes					12	0
281	Colon Cancer	50	713	1426	1426	0	0		Yes					20	0
282	Colon Cancer	50	425	850	850	0	0		Yes					22	0
283	Non-Small Cell Lung Cancer (NSCLC)	30	78	468	468	0	0		Yes					17	0
284	Prostate Cancer	90	96	576	480	0	0		Yes					26	0
285	Non-Small Cell Lung Cancer (NSCLC)	20	342	684	684	21	16	0.761905	Yes					20	0
286	Non-Small Cell Lung Cancer (NSCLC)	30	322	644	644	21	20	0.952381	Yes					28	0
287	Leiomyosarcoma, NOS	80	391	782	782	0	0		Yes					13	0
288	Non-Small Cell Lung Cancer (NSCLC)	30	256	512	512	21	15	0.714286	Yes					27	0
289	Melanoma	60	288	576	576	21	18	0.857143	Yes					20	0
290	Soft Tissue Sarcoma - Retroperitoneal/ Intra-abdominal	90	330	660	660	0	0		Yes					3	0
291	Breast Cancer - Invasive	5	35	490	490	21	0	0	Yes					9	0
292	Soft Tissue Sarcoma - Gastrointestinal Stromal Tumors (GIST)	80	500	1000	1000	0	0		Yes					3	0
293	Breast Cancer - Invasive	90	493	986	986	15	11	0.733333	Yes					26	0
294	Central Nervous System Cancers - Anaplastic Gliomas	90	119	476	476	0	0		Yes					7	0
295	Soft Tissue Sarcoma of the Extremity/Trunk	80	280	560	560	0	0		Yes					2	0
296	Non-Small Cell Lung Cancer (NSCLC)	85	120	480	480	0	0		Yes					22	0
297	Multiple Myeloma	70	364	2184	2184	15	15	1	Yes					15	0
298	Transitional Cell Cancer of the Renal Pelvis and Ureter	30	220	1320	880	0	0		Yes					0	0
299	Merkel Cell Carcinoma	60	176	352	352	0	0		Yes					9	0
300	Thymomas and Thymic Carcinomas	90	49	490	490	0	0		Yes					5	0
301	Breast Cancer - Invasive	80	84	504	504	0	0		Yes					19	0
302	Breast Cancer - Invasive	15	660	1320	1320	0	0		Yes					6	0
303	Breast Cancer - Invasive	80	399	798	798	0	0		Yes					19	0
304	Breast Cancer - Invasive	80	65	520	520	0	0		Yes					11	0
305	Breast Cancer - Invasive	80	48	480	480	0	0		Yes					5	0
306	Breast Cancer - Invasive	70	35	490	490	0	0		Yes					19	0
307	Breast Cancer - Invasive	25	120	480	480	0	0		Yes					16	0
308	breast Cancer - Invasive	30	60	480	480	0	0		Yes					13	0
309	Breast Cancer - Invasive	75	49	490	490	0	0		Yes					12	0
310	Breast Cancer - Invasive	80	468	936	936	0	0		Yes					8	0
311	Breast Cancer - Invasive	60	36	504	504	0	0		Yes					17	0
312	Breast Cancer - Invasive	80	40	480	480	0	0		Yes					18	0
313	Breast Cancer - Invasive	80	63	504	504	0	0		Yes					11	0
314	Breast Cancer - Noninvasive	60	252	504	504	0	0		Yes					7	0
315	Prostate Cancer	90	60	480	480	0	0		Yes					14	0
316	Colon Cancer	50	361	722	722	21	19	0.904762	Yes					26	0
317	Colon Cancer	10	126	2394	504	21	0	0	Yes					20	0
318	Non-Small Cell Lung Cancer (NSCLC)	30	154	616	616	2	2	1	Yes					20	0
319	Carcinoma of Unknown Primary	65	442	884	884	0	0		Yes					21	0
320	Synovial Sarcoma	85	192	384	384	21	18	0.857143	Yes					8	0
321	Breast Cancer - Invasive	90	120	720	720	0	0		Yes					16	0
322	Lung Neuroendocrine Tumors	70	529	1058	1058	2	2	1	Yes					11	0
323	Angiosarcoma	90	30	390	480	15	0	0	Yes					3	0
324	Breast Cancer - Invasive	60	240	480	480	21	18	0.857143	Yes					18	0
325	Non-Small Cell Lung Cancer (NSCLC)	10	135	540	540	15	12	0.8	Yes					26	0
326	Colon Cancer	75	770	1540	1540	21	18	0.857143	Yes					12	0
327	Ovarian Cancer – Epithelial Ovarian Cancer/Fallopian Tube Cancer/Primary Peritoneal Cancer	60	228	456	456	0	0		Yes					13	0
328	Non-Small Cell Lung Cancer (NSCLC)	30	84	504	504	2	2	1	Yes					19	0
329	Carcinoma of Unknown Primary	15	272	544	544	0	0		Yes					9	0
330	Non-Small Cell Lung Cancer (NSCLC)	80	112	448	448	0	0		Yes					29	0
331	Non-Small Cell Lung Cancer (NSCLC)	30	280	560	560	15	15	1	Yes					29	0
332	Lung Neuroendocrine Tumors	45	400	800	800	0	0		Yes					3	0
333	Non-Small Cell Lung Cancer (NSCLC)	10	8	248	120	0	0		Yes					22	0
334	Non-Small Cell Lung Cancer (NSCLC)	30	132	528	528	2	2	1	Yes					25	0
335	Ovarian Cancer – Epithelial Ovarian Cancer/Fallopian Tube Cancer/Primary Peritoneal Cancer	40	140	560	560	21	16	0.761905	Yes					18	0
336	Non-Small Cell Lung Cancer (NSCLC)	80	360	1440	1440	0	0		Yes					25	0
337	Basaloid carcinomas	80	304	608	608	0	0		Yes					12	0
338	Breast Cancer - Invasive	20	28	504	504	0	0		Yes					6	0
339	Breast Cancer - Invasive	30	609	1218	1218	0	0		Yes					10	0
340	Breast Cancer - Invasive	30	660	1320	1320	0	0		Yes					12	0
341	Breast Cancer - Invasive	25	425	850	850	0	0		Yes					11	0
342	Breast Cancer - Invasive	30	272	544	544	0	0		Yes					9	0
343	Breast Cancer - Invasive	50	224	448	448	0	0		Yes					13	0
344	Breast Cancer - Invasive	75	64	512	512	0	0		Yes					15	0
345	Breast Cancer - Invasive	40	504	1008	1008	0	0		Yes					6	0
346	Breast Cancer - Noninvasive	70	494	988	988	0	0		Yes					15	0
347	Breast Cancer - Invasive	75	270	540	540	0	0		Yes					6	0
348	Breast Cancer - Invasive	30	525	1050	1050	0	0		Yes					16	0
349	Breast Cancer - Invasive	70	81	486	486	0	0		Yes					25	0
350	Non-Small Cell Lung Cancer (NSCLC)	40	66	330	132	0	0		Yes					19	0
351	Non-Small Cell Lung Cancer (NSCLC)	20	121	1936	1936	0	0		Yes					20	0
352	Colon Cancer	30	690	1380	1380	21	16	0.761905	Yes					24	0
353	Non-Small Cell Lung Cancer (NSCLC)	75	575	1150	1150	2	0	0	Yes					22	0
354	Non-Small Cell Lung Cancer (NSCLC)	10	112	448	448	0	0		Yes					13	0
355	Non-Small Cell Lung Cancer (NSCLC)	70	176	352	352	21	19	0.904762	Yes					32	0
356	Breast Cancer - Invasive	30	135	540	540	0	0		Yes					16	0
357	Clear cell sarcoma	80	368	736	736	15	14	0.933333	Yes					14	0
358	Appendix	20	187	374	374	21	18	0.857143	Yes					12	0
359	Carcinoma of Unknown Primary	95	64	512	512	0	0		Yes					18	0
360	Non-Small Cell Lung Cancer (NSCLC)	50	210	1680	1680	2	2	1	Yes					24	0
361	Non-Melanoma Skin Cancers - Squamous Cell Skin Cancers	90	558	1116	1116	0	0		Yes					9	0
362	Ovarian Cancer – Epithelial Ovarian Cancer/Fallopian Tube Cancer/Primary Peritoneal Cancer	40	384	768	768	21	19	0.904762	Yes					33	0
363	Non-Small Cell Lung Cancer (NSCLC)	20	117	468	468	0	0		Yes					19	0
364	Pancreatic Adenocarcinoma	20	160	640	640	7	6	0.857143	Yes					28	0
365	Thymomas and Thymic Carcinomas	90	425	850	850	0	0		Yes					8	0
366	Ovarian Cancer – Epithelial Ovarian Cancer/Fallopian Tube Cancer/Primary Peritoneal Cancer	70	320	640	640	0	0		Yes					13	0
367	Soft Tissue Sarcoma - Retroperitoneal/ Intra-abdominal	40	260	520	520	21	17	0.809524	Yes					14	0
368	Esophageal and Esophagogastric Junction Cancers	50	36	504	504	1	1	1	Yes					13	0
369	Cervical Cancer	10	36	936	756	0	0		Yes					12	0
370	Esophageal and Esophagogastric Junction Cancers	20	651	1302	1302	21	19	0.904762	Yes					15	0
371	Ovarian Cancer - Malignant Sex Cord-Stromal Tumors	90	714	1428	1428	21	16	0.761905	Yes					24	0
372	Non-Small Cell Lung Cancer (NSCLC)	30	54	540	540	0	0		Yes					21	0
373	Non-Small Cell Lung Cancer (NSCLC)	40	49	490	490	0	0		Yes					22	0
374	Non-Small Cell Lung Cancer (NSCLC)	3	96	768	768	0	0		Yes					21	0
375	Colon Cancer	40	390	780	780	15	12	0.8	Yes					25	0
376	Breast Cancer - Invasive	70	9	504	504	0	0		Yes					14	0
377	Breast Cancer - Invasive	30	280	560	560	0	0		Yes					9	0
378	Carcinoma of Unknown Primary	5	225	450	450	0	0		Yes					8	0
379	Hepatobiliary Cancers - Intrahepatic Cholangiocarcinoma	40	162	648	648	0	0		Yes					7	0
380	Non-Small Cell Lung Cancer (NSCLC)	15	208	416	416	0	0		Yes					21	0
381	Colon Cancer	15	135	540	540	21	19	0.904762	Yes					28	0
382	Non-Small Cell Lung Cancer (NSCLC)	5	84	504	504	21	0	0	Yes					12	0
383	Soft Tissue Sarcoma of the Extremity/Trunk	60	850	1700	1700	0	0		Yes					7	0
384	Non-Small Cell Lung Cancer (NSCLC)	20	35	490	490	21	19	0.904762	Yes					24	0
385	Esophageal and Esophagogastric Junction Cancers	5	132	528	528	21	0	0	Yes					19	0
386	Non-Small Cell Lung Cancer (NSCLC)	40	180	360	360	0	0		Yes					12	0
387	Colon Cancer	50	18	504	504	21	16	0.761905	Yes					22	0
388	Non-Small Cell Lung Cancer (NSCLC)	20	98	588	490	0	0		Yes					7	0
389	Hepatobiliary Cancers - Hepatocellular Carcinoma	90	300	600	600	21	20	0.952381	Yes					29	0
390	Non-Small Cell Lung Cancer (NSCLC)	30	4	4	0	0	0		No					0	0
391	Non-Small Cell Lung Cancer (NSCLC)	15	25	75	0	0	0		No					0	0
392	Gastric Cancer	10	552	1104	1104	21	20	0.952381	Yes					11	0
393	Carcinoma of Unknown Primary	30	180	360	360	21	4	0.190476	Yes					15	0
394	Colon Cancer	40	54	540	540	21	17	0.809524	Yes					23	0
395	Thymomas and Thymic Carcinomas	80	143	572	572	2	1	0.5	Yes					6	0
396	Hepatobiliary Cancers - Intrahepatic Cholangiocarcinoma	20	98	588	588	0	0		Yes					9	0
397	Ovarian Cancer – Epithelial Ovarian Cancer/Fallopian Tube Cancer/Primary Peritoneal Cancer	70	152	608	608	0	0		Yes					14	0
398	Liposarcoma	50	484	968	968	0	0		Yes					1	0
399	Clear cell sarcoma	80	216	432	432	15	13	0.866667	Yes					15	0
400	Non-Small Cell Lung Cancer (NSCLC)	20	144	576	576	18	10	0.555556	Yes					22	0
401	Breast Cancer - Invasive	90	21	252	252	0	0		Yes					10	0
402	Rectal Cancer	25	20	520	520	0	0		Yes					11	0
403	Central Nervous System Cancers - Glioblastoma	80	70	560	560	0	0		Yes					13	0
404	Pancreatic Adenocarcinoma	40	25	500	500	21	18	0.857143	Yes					27	0
405	appendix	60	95	570	570	21	19	0.904762	Yes					14	0
406	Small intestine cancer	20	25	500	500	21	19	0.904762	Yes					20	0
407	Non-Small Cell Lung Cancer (NSCLC)	70	160	640	640	21	19	0.904762	Yes					28	0
408	Hepatobiliary Cancers - Intrahepatic Cholangiocarcinoma	5	672	1344	1344	0	0		Yes					2	0
409	Ovarian Cancer – Epithelial Ovarian Cancer/Fallopian Tube Cancer/Primary Peritoneal Cancer	15	247	494	494	0	0		Yes					9	0
410	Central Nervous System Cancers - Glioblastoma	80	480	960	960	0	0		Yes					9	0
411	Central Nervous System Cancers - Glioblastoma	80	400	800	800	0	0		Yes					27	0
412	breast Cancer - Invasive	25	210	420	420	21	20	0.952381	Yes					29	0
413	Rectal Cancer	30	40	480	480	0	0		Yes					7	0
414	Colon Cancer	40	80	480	480	0	0		Yes					17	0
415	non-small Cell Lung Cancer (NSCLC)	60	84	504	420	0	0		Yes					24	0
416	Central Nervous System Cancers - Glioblastoma	60	345	690	690	0	0		Yes					25	0
417	Central Nervous System Cancers - Glioblastoma	80	75	450	450	0	0		Yes					27	0
418	Central Nervous System Cancers - Glioblastoma	90	150	600	600	0	0		Yes					11	0
419	Central Nervous System Cancers - Glioblastoma	90	72	432	432	0	0		Yes					8	0
420	Breast Cancer - Invasive	40	414	828	828	0	0		Yes					9	0
421	Carcinoma of Unknown Primary	30	49	490	245	21	0	0	Yes					27	0
422	Non-Small Cell Lung Cancer (NSCLC)	40	272	544	544	0	0		Yes					31	0
423	Central Nervous System Cancers - Glioblastoma	80	336	672	672	0	0		Yes					11	0
424	Breast Cancer - Invasive	30	224	448	448	21	19	0.904762	Yes					24	0
425	Uterine Neoplasms - Endometrial Carcinoma	80	66	528	528	0	0		Yes					10	0
426	Breast Cancer - Invasive	30	150	600	600	0	0		Yes					25	0
427	Pancreatic Adenocarcinoma	25	100	600	600	0	0		Yes					9	0
428	Prostate Cancer	20	550	1100	1100	0	0		Yes					16	0
429	Non-Small Cell Lung Cancer (NSCLC)	5	54	702	0	3	0	0	No					0	0
430	Non-Small Cell Lung Cancer (NSCLC)	75	196	392	392	21	20	0.952381	Yes					37	0
431	Non-Small Cell Lung Cancer (NSCLC)	40	48	624	240	21	0	0	Yes					11	0
432	Prostate Cancer	70	140	560	560	15	9	0.6	Yes					33	0
433	Non-Small Cell Lung Cancer (NSCLC)	5	132	528	528	0	0		Yes					24	0
434	Central Nervous System Cancers - Anaplastic Gliomas	60	234	468	468	0	0		Yes					12	0
435	Thyroid Carcinoma - Papillary Carcinoma	25	660	1320	1320	0	0		Yes					7	0
436	Breast Cancer - Invasive	75	35	490	490	1	0	0	Yes					22	0
437	Mesothelioma Pleura	80	558	1116	1116	2	2	1	Yes					7	0
438	Non-Small Cell Lung Cancer (NSCLC)	20	88	528	968	2	0	0	Yes					12	0
439	Spindle Cell Sarcoma	70	238	476	476	2	2	1	Yes					10	0
440	Breast Cancer - Invasive	50	220	440	440	21	21	1	Yes					31	0
441	Uterine Neoplasms - Endometrial Carcinoma	30	252	504	504	0	0		Yes					19	0
442	Carcinoma of Unknown Primary	40	30	510	480	0	0		Yes					22	0
443	Non-Small Cell Lung Cancer (NSCLC)	15	165	660	660	2	2	1	Yes					21	0
444	Breast Cancer - Invasive	70	30	480	480	0	0		Yes					17	0
445	Colon Cancer	20	160	640	640	21	16	0.761905	Yes					30	0
446	Non-Small Cell Lung Cancer (NSCLC)	10	120	960	960	0	0		Yes					14	0
447	Gastric Cancer	10	24	480	480	2	2	1	Yes					2	0
448	Colon Cancer	1	4	56	0	21	0	0	No					0	0
449	Colon Cancer	30	45	540	540	21	19	0.904762	Yes					41	0
450	Carcinoid tumor	1	24	480	480	21	0	0	Yes					0	0
451	Central Nervous System Cancers - Glioblastoma	80	408	816	816	0	0		Yes					14	0
452	Neuroendocrine Tumors - Neuroendocrine Tumors of the GI Tract, Lung, and Thymus	90	224	448	448	2	2	1	Yes					7	0
453	Cervical Cancer	60	272	544	544	21	14	0.666667	Yes					21	0
454	Non-Small Cell Lung Cancer (NSCLC)	1	234	468	468	21	20	0.952381	Yes					22	0
455	Rectal Cancer	20	224	448	448	21	19	0.904762	Yes					28	0
456	Breast Cancer - Invasive	70	130	520	520	18	17	0.944444	Yes					18	0
457	Central Nervous System Cancers - Glioblastoma	95	242	484	484	0	0		Yes					9	0
458	Non-Small Cell Lung Cancer (NSCLC)	50	110	440	440	21	16	0.761905	Yes					25	0
459	Breast Cancer - Invasive	90	273	546	546	0	0		Yes					12	0
460	Small Cell Lung Cancer (SCLC)	90	10	500	500	0	0		Yes					4	0
461	Pancreatic Adenocarcinoma	20	72	432	432	0	0		Yes					11	0
462	Urothelial Carcinoma	50	182	364	364	2	2	1	Yes					23	0
463	Non-Small Cell Lung Cancer (NSCLC)	15	40	240	240	21	0	0	Yes					17	0
464	Non-Small Cell Lung Cancer (NSCLC)	50	121	968	968	21	17	0.809524	Yes					28	0
465	Adenoid cystic carcinoma	90	250	500	500	21	18	0.857143	Yes					24	0
466	Spindle Cell Sarcoma	80	494	988	988	21	16	0.761905	Yes					11	0
467	Carcinoma of Unknown Primary	80	121	484	484	21	18	0.857143	Yes					23	0
468	Small Cell Lung Cancer (SCLC)	70	196	392	392	21	17	0.809524	Yes					16	0
469	Pancreatic Adenocarcinoma	5	72	216	0	21	0	0	Yes					0	0
470	Non-Small Cell Lung Cancer (NSCLC)	10	375	750	750	15	15	1	Yes					26	0
471	Non-Small Cell Lung Cancer (NSCLC)	10	20	40	0	21	0	0	Yes					12	0
472	Non-Small Cell Lung Cancer (NSCLC)	30	42	504	504	21	19	0.904762	Yes					20	0
473	Non-Small Cell Lung Cancer (NSCLC)	20	156	624	624	0	0		Yes					12	0
474	Non-Small Cell Lung Cancer (NSCLC)	40	288	576	576	15	14	0.933333	Yes					26	0
475	Urothelial Carcinoma	30	182	364	364	2	2	1	Yes					22	0
476	Non-Small Cell Lung Cancer (NSCLC)	30	63	504	504	2	2	1	Yes					23	0
477	Kidney Cancer	65	30	0	240	2	0	0	Yes					13	0
478	Melanoma	90	748	1496	1496	0	0		Yes					6	0
479	Central Nervous System Cancers - Glioblastoma	90	234	468	468	21	20	0.952381	Yes					27	0
480	Non-Small Cell Lung Cancer (NSCLC)	60	36	0	504	21	0	0	Yes					12	0
481	Ovarian Cancer – Epithelial Ovarian Cancer/Fallopian Tube Cancer/Primary Peritoneal Cancer	90	304	608	608	15	14	0.933333	Yes					20	0
482	Breast Cancer - Invasive	80	32	512	512	21	18	0.857143	Yes					20	0
483	Ovarian Cancer – Epithelial Ovarian Cancer/Fallopian Tube Cancer/Primary Peritoneal Cancer	90	375	750	750	21	18	0.857143	Yes					27	0
484	Non-Small Cell Lung Cancer (NSCLC)	80	72	432	432	21	17	0.809524	Yes					28	0
485	Breast Cancer - Invasive	30	532	1064	1064	0	0		Yes					12	0
486	Ovarian Cancer – Epithelial Ovarian Cancer/Fallopian Tube Cancer/Primary Peritoneal Cancer	85	120	480	480	16	13	0.8125	Yes					30	0
487	Anal Carcinoma	80	80	480	480	0	0		Yes					9	0
488	Melanoma	90	12	504	504	0	0		Yes					14	0
489	Non-Small Cell Lung Cancer (NSCLC)	15	50	500	0	0	0		Yes					3	0
490	Cervical Cancer	40	210	420	420	20	14	0.7	Yes					20	0
491	Colon Cancer	80	90	540	540	21	18	0.857143	Yes					21	0
492	Gastric Cancer	50	18	504	504	21	17	0.809524	Yes					15	0
493	Non-Small Cell Lung Cancer (NSCLC)	80	204	408	408	15	15	1	Yes					28	0
494	Carcinoma of Unknown Primary	70	208	416	416	21	16	0.761905	Yes					32	0
495	Breast Cancer - Invasive	70	270	540	540	15	14	0.933333	Yes					30	0
496	Non-Small Cell Lung Cancer (NSCLC)	80	171	342	342	0	0		Yes					19	0
497	Carcinoma of Unknown Primary	50	90	540	540	21	17	0.809524	Yes					14	0
498	Central Nervous System Cancers - Glioblastoma	90	126	504	504	3	1	0.333333	Yes					17	0
499	Central Nervous System Cancers - Glioblastoma	80	110	440	440	3	0	0	Yes					0	0
500	Central Nervous System Cancers - Glioblastoma	80	30	480	480	3	0	0	Yes					0	0
501	Central Nervous System Cancers - Glioblastoma	90	88	528	528	3	1	0.333333	Yes					17	0
502	Central Nervous System Cancers - Glioblastoma	90	272	544	544	3	2	0.666667	Yes					9	0
503	Central Nervous System Cancers - Glioblastoma	90	104	416	416	3	2	0.666667	Yes					20	0
504	Central Nervous System Cancers - Glioblastoma	80	182	364	364	3	0	0	Yes					4	0
505	Central Nervous System Cancers - Glioblastoma	80	70	560	560	3	0	0	Yes					1	0
506	Central Nervous System Cancers - Glioblastoma	90	18	252	504	3	0	0	Yes					18	0
507	Non-Small Cell Lung Cancer (NSCLC)	20	91	546	546	3	2	0.666667	Yes					31	0
508	Non-Small Cell Lung Cancer (NSCLC)	70	21	504	504	3	3	1	Yes					20	0
509	Cervical Cancer	80	156	624	624	3	1	0.333333	Yes					2	0
510	Breast Cancer - Invasive	70	72	432	432	3	0	0	Yes					1	0
511	Kidney Cancer	50	60	480	480	3	0	0	Yes					1	0
512	Non-Small Cell Lung Cancer (NSCLC)	20	40	480	480	3	3	1	Yes					13	0
513	Ovarian Cancer – Epithelial Ovarian Cancer/Fallopian Tube Cancer/Primary Peritoneal Cancer	20	160	640	800	0	0		No					0	0
514	Non-Small Cell Lung Cancer (NSCLC)	1	300	3000	3000	21	16	0.761905	Yes					27	0
515	Colon Cancer	20	2	20	0	21	0	0	Yes					0	0
516	Vulva	75	441	882	882	18	16	0.888889	Yes					19	0
517	Non-Melanoma Skin Cancers - Basal Cell Skin Cancers	70	176	352	352	2	2	1	Yes					16	0
518	Non-Small Cell Lung Cancer (NSCLC)	60	130	520	520	15	9	0.6	Yes					23	0
519	Gastric Cancer	30	18	54	252	2	0	0	Yes					12	0
520	Non-Small Cell Lung Cancer (NSCLC)	40	270	540	540	15	0	0	Yes					0	0
521	Neuroendocrine Tumors - Neuroendocrine Tumors of the Pancreas (Islet Cell Tumors)	80	255	510	510	21	17	0.809524	Yes					42	0
522	Rectal Cancer	50	391	782	782	21	18	0.857143	Yes					19	0
523	Prostate Cancer	40	156	624	624	21	17	0.809524	Yes					8	0
524	Urothelial Carcinoma	80	60	480	480	21	0	0	Yes					31	0
525	Breast Cancer - Invasive	80	480	960	960	21	19	0.904762	Yes					11	0
526	Carcinoma of Unknown Primary	20	55	550	550	0	0		Yes					16	0
527	Soft Tissue Sarcoma of the Extremity/Trunk	90	60	480	480	2	2	1	Yes					2	0
528	Gastric Cancer	30	121	484	484	2	2	1	Yes					10	0
529	Melanoma	40	10	500	500	2	2	1	Yes					9	0
530	Thymomas and Thymic Carcinomas	99	437	874	874	2	2	1	Yes					21	0
531	Hepatobiliary Cancers - Hepatocellular Carcinoma	85	368	736	736	21	19	0.904762	Yes					38	0
532	Melanoma	80	132	528	528	15	0	0	Yes					0	0
533	Pancreatic Adenocarcinoma	90	408	816	816	21	17	0.809524	Yes					12	0
534	Non-Small Cell Lung Cancer (NSCLC)	70	12	504	456	21	0	0	Yes					1	0
535	Non-Small Cell Lung Cancer (NSCLC)	40	18	504	504	21	0	0	Yes					1	0
536	Breast Cancer - Invasive	70	288	576	576	15	15	1	Yes					18	0
537	Mesothelioma Pleura	70	408	816	816	21	19	0.904762	Yes					19	0
538	Breast Cancer - Invasive	60	20	520	520	0	0		Yes					3	0
539	Pancreatic Adenocarcinoma	70	40	240	360	21	0	0	Yes					4	0
540	Synovial Sarcoma	95	152	608	608	2	2	1	Yes					25	0
541	Pancreatic Adenocarcinoma	20	525	1050	1050	21	19	0.904762	Yes					24	0
542	Thyroid Carcinoma - Anaplastic Carcinoma	40	336	672	672	21	18	0.857143	Yes					31	0
543	Soft Tissue Sarcoma of the Extremity/Trunk	80	104	416	416	2	2	1	Yes					7	0
544	Breast Cancer - Invasive	60	108	432	432	15	14	0.933333	Yes					16	0
545	Breast Cancer - Invasive	40	210	420	420	4	4	1	Yes					22	0
546	Small Cell Lung Cancer (SCLC)	90	2	10	16	2	2	1	Yes					0	0
547	Soft Tissue Sarcoma of the Extremity/Trunk	80	94	564	564	2	2	1	Yes					32	0
548	Breast Cancer - Invasive	30	224	448	448	2	2	1	Yes					13	0
549	Carcinoma of Unknown Primary	50	525	1050	1050	2	2	1	Yes					4	0
550	Pancreatic Adenocarcinoma	15	176	352	352	0	0		Yes					10	0
551	Non-Small Cell Lung Cancer (NSCLC)	80	104	416	416	0	0		Yes					14	0
552	Uterine Neoplasms - Endometrial Carcinoma	60	315	630	630	21	18	0.857143	Yes					23	0
553	Soft Tissue Sarcoma of the Extremity/Trunk	90	390	1560	1560	21	19	0.904762	Yes					24	0
554	Ewing's Sarcoma	60	528	1056	1056	21	18	0.857143	Yes					29	0
555	Ewing's Sarcoma	60	36	252	0	21	0	0	Yes					9	0
556	Central Nervous System Cancers - Glioblastoma	90	468	936	936	15	13	0.866667	Yes					23	0
557	Neuroblastoma	75	40	480	480	0	0		Yes					27	0
558	Neuroblastoma	90	418	836	836	21	15	0.714286	Yes					13	0
559	Non-Small Cell Lung Cancer (NSCLC)	10	234	468	468	16	12	0.75	Yes					21	0
560	Breast Cancer - Invasive	30	238	476	476	16	15	0.9375	Yes					22	0
561	Carcinoma of Unknown Primary	60	32	512	512	16	12	0.75	Yes					13	0
562	Prostate Cancer	80	405	810	810	16	15	0.9375	Yes					14	0
563	Central Nervous System Cancers - Anaplastic Gliomas	90	35	490	490	16	15	0.9375	Yes					22	0
564	Colon Cancer	30	304	608	608	16	14	0.875	Yes					14	0
565	Melanoma	20	110	440	440	0	0		Yes					9	0
566	Carcinoma of Unknown Primary	20	323	646	646	21	18	0.857143	Yes					39	0
567	Non-Small Cell Lung Cancer (NSCLC)	70	64	512	512	21	18	0.857143	Yes					23	0
568	Colon Cancer	50	120	480	480	0	0		Yes					24	0
569	Non-Small Cell Lung Cancer (NSCLC)	30	56	448	448	0	0		Yes					11	0
570	Gastric Cancer	20	320	640	640	21	18	0.857143	Yes					31	0
571	Carcinoma of Unknown Primary	70	324	648	648	21	19	0.904762	Yes					22	0
572	Colon Cancer	50	198	396	396	21	16	0.761905	Yes					23	0
573	Mesothelioma Pleura	50	315	630	630	2	2	1	Yes					23	0
574	Non-Small Cell Lung Cancer (NSCLC)	60	60	480	480	21	19	0.904762	Yes					19	0
575	Non-Small Cell Lung Cancer (NSCLC)	60	130	520	520	21	17	0.809524	Yes					26	0
576	breast Cancer - Invasive	60	27	486	486	2	2	1	Yes					2	0
577	Appendix	10	117	468	468	3	3	1	Yes					34	0
578	Pancreatic Adenocarcinoma	80	210	420	420	15	13	0.866667	Yes					27	0
579	Breast Cancer - Invasive	90	476	952	952	3	3	1	Yes					8	0
580	Non-Small Cell Lung Cancer (NSCLC)	35	72	432	432	2	2	1	Yes					7	0
581	Esophageal and Esophagogastric Junction Cancers	85	546	1092	1092	21	16	0.761905	Yes					36	0
582	Cervical Cancer	90	70	560	560	21	17	0.809524	Yes					21	0
583	Neuroendocrine Tumors - Adrenal Gland Tumors	90	420	840	840	2	2	1	Yes					1	0
584	Bone Cancer - Osteosarcoma	70	40	480	240	21	0	0	Yes					17	0
585	Bone Cancer - Osteosarcoma	60	483	966	966	15	12	0.8	Yes					18	0
586	Atypical Teratoid/Rhabdoid Tumor	90	10	250	0	21	18	0.857143	Yes					30	0
587	Central Nervous System Cancers - Glioblastoma	80	99	594	594	21	21	1	Yes					16	0
588	Bone Cancer - Osteosarcoma	80	374	7480	7480	21	11	0.52381	Yes					12	0
589	Neuroblastoma	30	399	798	798	2	2	1	Yes					8	0
590	Bone Cancer - Osteosarcoma	70	437	874	874	16	11	0.6875	Yes					5	0
591	Wilms tumor	50	510	1020	1020	16	12	0.75	Yes					15	0
592	Bone Cancer - Osteosarcoma	35	30	480	480	16	15	0.9375	Yes					15	0
593	Alveolar rhabdomyosarcoma	80	520	1040	1040	16	13	0.8125	Yes					13	0
594	Soft Tissue Sarcoma - Retroperitoneal/ Intra-abdominal	90	416	832	832	16	14	0.875	Yes					10	0
595	Neuroblastoma	60	168	336	336	16	14	0.875	Yes					14	0
596	Ewing's Sarcoma	90	520	1040	1040	16	16	1	Yes					10	0
597	Breast Cancer - Invasive	70	315	630	630	16	14	0.875	Yes					8	0
598	Breast Cancer - Invasive	25	322	644	644	16	12	0.75	Yes					5	0
599	Carcinoma of Unknown Primary	70	143	572	572	16	14	0.875	Yes					16	0
600	Urothelial Carcinoma	50	324	648	648	16	16	1	Yes					27	0
601	Head and Neck Cancers - Cancer of the Oropharynx	30	429	858	858	16	15	0.9375	Yes					16	0
602	Non-Small Cell Lung Cancer (NSCLC)	30	266	532	532	16	12	0.75	Yes					5	0
603	Non-Small Cell Lung Cancer (NSCLC)	70	132	528	528	15	12	0.8	Yes					37	0
604	Carcinoma of Unknown Primary	40	266	532	532	2	2	1	Yes					7	0
605	Thyroid Carcinoma - Medullary Carcinoma	70	14	280	294	0	0		Yes					27	0
606	Pancreatic Adenocarcinoma	25	299	598	598	21	19	0.904762	Yes					23	0
607	Non-Small Cell Lung Cancer (NSCLC)	30	24	480	480	21	20	0.952381	Yes					31	0
608	Breast Cancer - Invasive	50	480	960	960	15	12	0.8	Yes					23	0
609	Non-Small Cell Lung Cancer (NSCLC)	25	238	476	476	15	12	0.8	Yes					26	0
610	Non-Small Cell Lung Cancer (NSCLC)	60	264	528	528	2	2	1	Yes					16	0
611	Hepatobiliary Cancers - Hepatocellular Carcinoma	70	96	576	576	2	2	1	Yes					7	0
612	Non-Small Cell Lung Cancer (NSCLC)	60	72	432	432	21	18	0.857143	Yes					22	0
613	Colon Cancer	10	104	416	416	21	17	0.809524	Yes					22	0
614	Liposarcoma	30	81	486	486	21	16	0.761905	Yes					34	0
615	pancreatic Adenocarcinoma	40	99	594	594	21	16	0.761905	Yes					18	0
616	Non-Melanoma Skin Cancers - Squamous Cell Skin Cancers	30	147	588	588	21	17	0.809524	Yes					29	0
617	Bladder Cancer	50	64	512	512	3	3	1	Yes					7	0
618	Breast Cancer - Invasive	25	33	528	528	13	11	0.846154	Yes					26	0
619	Non-Small Cell Lung Cancer (NSCLC)	80	36	432	504	3	2	0.666667	Yes					20	0
620	Breast Cancer - Invasive	80	72	432	432	2	2	1	Yes					0	0
621	Small Cell Lung Cancer (SCLC)	60	132	528	528	3	2	0.666667	Yes					18	0
622	Breast Cancer - Invasive	75	40	480	480	2	2	1	Yes					3	0
623	Pancreatic Adenocarcinoma	30	368	736	736	3	2	0.666667	Yes					12	0
624	Hemangiopericytoma	95	34	476	476	15	13	0.866667	Yes					34	0
625	Prostate Cancer	80	91	546	546	0	0		Yes					24	0
626	Hepatobiliary Cancers - Hepatocellular Carcinoma	50	65	520	520	3	2	0.666667	Yes					10	0
627	Germ Cell Tumors	80	35	490	490	0	0		Yes					5	0
628	Non-Small Cell Lung Cancer (NSCLC)	80	272	544	544	0	0		Yes					6	0
629	Breast Cancer - Invasive	70	420	840	840	0	0		Yes					8	0
630	Angiosarcoma	30	238	476	476	21	18	0.857143	Yes					14	0
631	Colon Cancer	80	35	490	490	2	2	1	Yes					15	0
632	Non-Small Cell Lung Cancer (NSCLC)	30	300	600	600	2	2	1	Yes					11	0
633	Leiomyosarcoma, NOS	90	441	882	882	3	3	1	Yes					11	0
634	Breast Cancer - Invasive	60	182	364	364	21	19	0.904762	Yes					31	0
635	Breast Cancer - Invasive	30	16	512	320	0	0		Yes					16	0
636	Non-Small Cell Lung Cancer (NSCLC)	80	190	380	380	21	19	0.904762	Yes					12	0
637	Carcinoma of Unknown Primary	50	28	504	532	21	19	0.904762	Yes					19	0
638	Pancreatic Adenocarcinoma	40	198	396	396	0	0		Yes					14	0
639	Central Nervous System Cancers - Low grade astrocytoma	70	256	512	512	2	2	1	Yes					13	0
640	Breast Cancer - Invasive	35	320	640	640	21	17	0.809524	Yes					17	0
641	Small Cell Lung Cancer (SCLC)	80	759	1518	1518	21	17	0.809524	Yes					10	0
642	Carcinoma of Unknown Primary	60	260	520	520	15	15	1	Yes					35	0
643	Pancreatic Adenocarcinoma	50	459	918	918	15	12	0.8	Yes					29	0
644	Urothelial Carcinoma	60	110	440	440	21	16	0.761905	Yes					21	0
645	Colon Cancer	30	238	476	476	21	17	0.809524	Yes					15	0
646	Leiomyosarcoma, uterus	80	540	1080	1080	21	16	0.761905	Yes					25	0
647	Ovarian Cancer – Epithelial Ovarian Cancer/Fallopian Tube Cancer/Primary Peritoneal Cancer	80	378	756	756	2	2	1	Yes					18	0
648	Breast Cancer - Invasive	80	352	704	704	2	2	1	Yes					19	0
649	Pancreatic Adenocarcinoma	25	168	336	336	3	3	1	Yes					24	0
650	Synovial Sarcoma	90	252	504	504	2	2	1	Yes					18	0
651	Carcinoma of Unknown Primary	40	690	1380	1380	21	17	0.809524	Yes					26	0
652	Breast Cancer - Invasive	40	280	560	560	0	0		Yes					14	0
653	Breast Cancer - Invasive	50	42	504	504	21	19	0.904762	Yes					37	0
654	Cervical Cancer	40	36	144	0	21	0	0	Yes					5	0
655	Non-Small Cell Lung Cancer (NSCLC)	80	48	480	480	15	13	0.866667	Yes					20	0
656	Appendix	30	187	374	374	2	2	1	Yes					12	0
657	Non-Small Cell Lung Cancer (NSCLC)	40	144	1728	576	2	2	1	Yes					25	0
658	Colon Cancer	30	35	490	490	15	13	0.866667	Yes					19	0
659	Leiomyosarcoma, NOS	80	399	798	798	15	14	0.933333	Yes					38	0
660	Non-Small Cell Lung Cancer (NSCLC)	60	10	500	500	21	0	0	Yes					0	0
661	Neuroendocrine Tumors - Neuroendocrine Tumors of the GI Tract, Lung, and Thymus	50	36	504	828	0	0		Yes					24	0
662	Non-Small Cell Lung Cancer (NSCLC)	50	84	504	504	9	7	0.777778	Yes					23	0
663	Breast Cancer - Invasive	35	256	512	512	15	14	0.933333	Yes					24	0
664	Small Cell Lung Cancer (SCLC)	50	143	572	572	4	4	1	Yes					36	0
665	Colon Cancer	40	270	540	540	2	2	1	Yes					11	0
666	Non-Small Cell Lung Cancer (NSCLC)	30	256	512	512	2	2	1	Yes					20	0
667	Breast Cancer - Invasive	30	204	408	408	3	3	1	Yes					8	0
668	Rectal Cancer	60	280	560	560	2	2	1	Yes					19	0
669	Head and Neck Cancers - Occult Primary	70	42	504	504	3	3	1	Yes					20	0
670	Non-Small Cell Lung Cancer (NSCLC)	50	187	374	374	15	12	0.8	Yes					19	0
671	Colon Cancer	40	72	432	432	19	15	0.789474	Yes					19	0
672	Pancreatic Adenocarcinoma	35	99	594	594	21	17	0.809524	Yes					24	0
673	Non-Small Cell Lung Cancer (NSCLC)	40	84	504	504	21	17	0.809524	Yes					33	0
674	Soft Tissue Sarcoma - Gastrointestinal Stromal Tumors (GIST)	35	600	1200	1200	21	20	0.952381	Yes					36	0
675	Colon Cancer	10	551	1102	1102	15	14	0.933333	Yes					11	0
676	Pancreatic Adenocarcinoma	60	216	432	432	0	0		Yes					19	0
677	Small Cell Lung Cancer (SCLC)	15	192	384	384	4	4	1	Yes					18	0
678	Esophageal and Esophagogastric Junction Cancers	40	342	684	684	4	3	0.75	Yes					21	0
679	Neuroendocrine Tumors - Neuroendocrine Tumors of the GI Tract, Lung, and Thymus	40	136	544	544	2	2	1	Yes					21	0
680	Non-Small Cell Lung Cancer (NSCLC)	60	368	736	736	0	0		Yes					0	0
681	Bladder Cancer	60	143	572	0	0	0		Yes					5	0
682	Breast Cancer - Invasive	50	45	540	0	6	5	0.833333	Yes					7	0
683	Pancreatic Adenocarcinoma	40	80	480	480	15	13	0.866667	Yes					15	0
684	Breast Cancer - Invasive	60	16	512	512	1	1	1	Yes					10	0
685	Non-Small Cell Lung Cancer (NSCLC)	50	306	612	612	2	2	1	Yes					8	0
686	Non-Small Cell Lung Cancer (NSCLC)	70	208	416	416	21	19	0.904762	Yes					26	0
687	Thyroid Carcinoma - Medullary Carcinoma	35	81	486	486	21	15	0.714286	Yes					16	0
688	Carcinoma of Unknown Primary	60	81	486	486	3	3	1	Yes					17	0
689	Soft Tissue Sarcoma of the Extremity/Trunk	80	247	494	494	15	12	0.8	Yes					20	0
690	Breast Cancer - Invasive	40	80	480	480	21	18	0.857143	Yes					32	0
691	Non-Small Cell Lung Cancer (NSCLC)	30	20	520	620	0	0		Yes					35	0
692	Hepatobiliary Cancers - Intrahepatic Cholangiocarcinoma	35	8	248	0	21	0	0	Yes					12	0
693	germ Cell Tumors	40	324	648	648	0	0		Yes					3	0
694	Non-Small Cell Lung Cancer (NSCLC)	70	180	360	1080	2	2	1	Yes					11	0
695	Esophageal and Esophagogastric Junction Cancers	1	272	544	544	2	2	1	Yes					7	0
696	Non-Small Cell Lung Cancer (NSCLC)	80	248	496	496	0	0		Yes					15	0
697	Non-Small Cell Lung Cancer (NSCLC)	25	228	456	456	21	16	0.761905	Yes					19	0
698	Non-Small Cell Lung Cancer (NSCLC)	50	45	540	540	19	16	0.842105	Yes					11	0
699	Carcinoma of Unknown Primary	75	98	588	588	2	2	1	Yes					9	0
700	Colon Cancer	70	560	1120	1120	21	15	0.714286	Yes					33	0
701	Non-Melanoma Skin Cancers - Squamous Cell Skin Cancers	80	143	572	572	21	15	0.714286	Yes					14	0
702	Hepatobiliary Cancers - Hepatocellular Carcinoma	60	77	462	539	21	0	0	Yes					12	0
703	Head and Neck Cancers - Occult Primary	40	21	168	0	21	0	0	Yes					12	0
704	Colon Cancer	50	77	462	462	21	18	0.857143	Yes					24	0
705	Breast Cancer - Invasive	40	340	680	680	2	2	1	Yes					32	0
706	Solid Tumors	60	96	576	576	4	4	1	Yes					30	0
707	Thymomas and Thymic Carcinomas	80	330	660	660	3	3	1	Yes					16	0
708	Non-Small Cell Lung Cancer (NSCLC)	80	88	528	528	4	4	1	Yes					19	0
709	Carcinoma of Unknown Primary	50	504	1008	1008	21	17	0.809524	Yes					13	0
710	Breast Cancer - Invasive	80	10	500	400	21	0	0	Yes					7	0
711	Breast Cancer - Invasive	20	224	448	448	19	15	0.789474	Yes					38	0
712	Carcinoma of Unknown Primary	15	432	864	864	21	17	0.809524	Yes					20	0
713	Colon Cancer	40	336	672	672	0	0		Yes					7	0
714	Breast Cancer - Invasive	40	256	512	512	3	3	1	Yes					39	0
715	Non-Small Cell Lung Cancer (NSCLC)	35	575	1150	1150	2	2	1	Yes					31	0
716	Non-Small Cell Lung Cancer (NSCLC)	60	220	440	440	7	5	0.714286	Yes					20	0
717	Pancreatic Adenocarcinoma	40	104	416	416	1	1	1	Yes					23	0
718	Ampulla of Vater	40	240	480	480	19	16	0.842105	Yes					19	0
719	Soft Tissue Sarcoma - Gastrointestinal Stromal Tumors (GIST)	30	28	448	448	1	1	1	Yes					38	0
720	Pancreatic Adenocarcinoma	30	135	540	540	3	3	1	Yes					23	0
721	Head and Neck Cancers - Cancer of the Oral Cavity	60	368	736	736	0	0		Yes					19	0
722	Non-Small Cell Lung Cancer (NSCLC)	5	360	720	720	21	18	0.857143	Yes					25	0
723	Thymomas and Thymic Carcinomas	90	36	504	504	15	13	0.866667	Yes					20	0
724	Colon Cancer	30	117	468	468	2	2	1	Yes					9	0
725	Pancreatic Adenocarcinoma	35	368	736	736	2	2	1	Yes					0	0
726	Pancreatic Adenocarcinoma	15	238	476	476	19	17	0.894737	Yes					17	0
727	Melanoma	70	63	504	504	21	20	0.952381	Yes					21	0
728	Rectal Cancer	35	24	480	384	21	0	0	Yes					13	0
729	Breast Cancer - Invasive	80	340	680	680	2	2	1	Yes					13	0
730	Melanoma	50	496	992	992	3	3	1	Yes					19	0
731	Neuroendocrine Tumors - Poorly Differentiated (High-Grade or Anaplastic)/Small Cell	90	156	624	624	2	2	1	Yes					15	0
732	Non-Small Cell Lung Cancer (NSCLC)	70	39	468	468	19	17	0.894737	Yes					23	0
733	Non-Small Cell Lung Cancer (NSCLC)	30	270	540	540	19	16	0.842105	Yes					23	0
734	Breast Cancer - Invasive	70	92	552	552	21	19	0.904762	Yes					25	0
735	Carcinoma of Unknown Primary	5	285	570	570	21	18	0.857143	Yes					23	0
736	Breast Cancer - Invasive	35	450	900	900	21	18	0.857143	Yes					33	0
737	Breast Cancer - Invasive	40	144	576	576	19	16	0.842105	Yes					11	0
738	Breast Cancer - Invasive	40	70	560	560	1	1	1	Yes					24	0
739	Non-Small Cell Lung Cancer (NSCLC)	60	28	504	476	19	17	0.894737	Yes					25	0
740	Breast Cancer - Invasive	25	221	442	442	21	20	0.952381	Yes					24	0
741	Non-Small Cell Lung Cancer (NSCLC)	35	120	480	480	19	0	0	Yes					13	0
742	Breast Cancer - Invasive	35	357	714	714	21	19	0.904762	Yes					46	0
743	Appendix	50	408	816	816	21	17	0.809524	Yes					25	0
744	Non-Small Cell Lung Cancer (NSCLC)	60	434	868	868	21	18	0.857143	Yes					43	0
745	Non-Small Cell Lung Cancer (NSCLC)	35	56	448	448	0	0		Yes					33	0
746	Non-Small Cell Lung Cancer (NSCLC)	70	121	484	484	16	14	0.875	Yes					22	0
747	Non-Small Cell Lung Cancer (NSCLC)	70	108	432	432	19	18	0.947368	Yes					27	0
748	Prostate Cancer	50	513	1026	1026	19	15	0.789474	Yes					21	0
749	Breast Cancer - Invasive	70	510	1020	1020	19	15	0.789474	Yes					25	0
750	Hepatobiliary Cancers - Extrahepatic Cholangiocarcinoma	25	36	504	504	0	0		Yes					24	0
751	Appendix	25	6	108	0	19	0	0	Yes					11	0
752	Rectal Cancer	40	180	360	360	21	19	0.904762	Yes					27	0
753	Colon Cancer	35	588	1176	1176	21	17	0.809524	Yes					27	0
754	Breast Cancer - Invasive	35	6	84	0	19	0	0	Yes					0	0
755	Small Cell Lung Cancer (SCLC)	70	40	480	480	19	17	0.894737	Yes					42	0
756	Soft Tissue Sarcoma - Gastrointestinal Stromal Tumors (GIST)	75	289	578	578	3	3	1	Yes					20	0
757	Breast Cancer - Invasive	60	36	504	504	2	2	1	Yes					4	0
758	Gastric Cancer	40	70	560	560	4	4	1	Yes					32	0
759	Non-Small Cell Lung Cancer (NSCLC)	40	58	464	464	6	6	1	Yes					47	0
760	Colon Cancer	40	368	736	736	2	2	1	Yes					11	0
761	Rectal Cancer	30	98	588	588	21	20	0.952381	Yes					24	0
762	Breast Cancer - Invasive	35	78	468	468	21	17	0.809524	Yes					14	0
763	Ewing's Sarcoma	80	216	432	432	1	1	1	Yes					12	0
764	Colon Cancer	70	36	504	504	3	3	1	Yes					18	0
765	Breast Cancer - Invasive	25	475	950	950	19	15	0.789474	Yes					28	0
766	Colon Cancer	30	483	966	966	3	3	1	Yes					28	0
767	Breast Cancer - Invasive	50	220	440	440	19	17	0.894737	Yes					26	0
768	Rectal Cancer	35	598	1196	1196	19	17	0.894737	Yes					41	0
769	Breast Cancer - Invasive	30	352	704	704	19	16	0.842105	Yes					22	0
770	Small Cell Lung Cancer (SCLC)	80	304	608	608	3	3	1	Yes					29	0
771	Breast Cancer - Invasive	40	240	480	480	19	16	0.842105	Yes					30	0
772	Colon Cancer	35	72	432	216	19	0	0	Yes					40	0
773	Breast Cancer - Invasive	70	135	540	540	19	17	0.894737	Yes					33	0
774	Non-Small Cell Lung Cancer (NSCLC)	40	70	560	560	19	16	0.842105	Yes					15	0
775	Breast Cancer - Invasive	40	529	1058	1058	19	15	0.789474	Yes					19	0
776	Urothelial Carcinoma	60	156	624	624	19	17	0.894737	Yes					21	0
777	Non-Small Cell Lung Cancer (NSCLC)	40	99	594	594	2	2	1	Yes					12	0
778	Breast Cancer - Invasive	65	240	480	480	19	15	0.789474	Yes					27	0
779	Breast Cancer - Invasive	80	330	660	660	19	15	0.789474	Yes					24	0
780	uterine Neoplasms - Endometrial Carcinoma	60	117	468	468	0	0		Yes					30	0
781	Neuroendocrine Tumors - Neuroendocrine Tumors of the GI Tract, Lung, and Thymus	40	494	988	988	2	2	1	Yes					5	0
782	Pancreatic Adenocarcinoma	35	667	1334	1334	19	15	0.789474	Yes					25	0
783	Uterine Neoplasms - Endometrial Carcinoma	70	45	540	540	0	0		Yes					20	0
784	Pancreatic Adenocarcinoma	30	240	480	480	3	3	1	Yes					25	0
785	Soft Tissue Sarcoma - Solitary Fibrous Tumor/Hemangiopericytoma	90	651	1302	1302	19	15	0.789474	Yes					37	0
786	Soft Tissue Sarcoma - Gastrointestinal Stromal Tumors (GIST)	80	504	1008	1008	19	14	0.736842	Yes					15	0
787	Rectal Cancer	70	190	380	380	19	18	0.947368	Yes					23	0
788	Non-Small Cell Lung Cancer (NSCLC)	40	96	576	576	2	2	1	Yes					11	0
789	Non-Small Cell Lung Cancer (NSCLC)	25	99	594	594	2	2	1	Yes					6	0
790	Breast Cancer - Invasive	60	240	480	480	2	2	1	Yes					17	0
791	Non-Small Cell Lung Cancer (NSCLC)	80	64	512	512	2	2	1	Yes					1	0
792	Non-Small Cell Lung Cancer (NSCLC)	20	400	800	800	2	2	1	Yes					16	0
793	Neuroendocrine Tumors - Neuroendocrine Tumors of the GI Tract, Lung, and Thymus	70	5	0	150	3	3	1	Yes					17	0
794	Colon Cancer	20	66	528	264	19	0	0	Yes					17	0
795	Colon Cancer	35	108	432	432	19	13	0.684211	Yes					21	0
796	Uterine Neoplasms - Endometrial Carcinoma	40	209	418	418	19	17	0.894737	Yes					31	0
797	Non-Small Cell Lung Cancer (NSCLC)	90	70	560	560	0	0		Yes					26	0
798	Colon Cancer	30	24	336	0	2	2	1	Yes					12	0
799	Pancreatic Adenocarcinoma	30	304	608	608	19	17	0.894737	Yes					22	0
800	Non-Small Cell Lung Cancer (NSCLC)	25	66	198	0	19	17	0.894737	Yes					24	0
801	Pancreatic Adenocarcinoma	25	588	1176	1176	19	16	0.842105	Yes					34	0
802	Breast Cancer - Invasive	40	152	304	0	19	0	0	Yes					3	0
803	Prostate Cancer	80	476	952	952	19	17	0.894737	Yes					32	0
804	Kidney Cancer	90	144	576	576	19	17	0.894737	Yes					31	0
805	Thymomas and Thymic Carcinomas	60	35	490	490	19	0	0	Yes					19	0
806	Hepatobiliary Cancers - Hepatocellular Carcinoma	80	104	416	416	0	0		Yes					23	0
807	Kidney Cancer	70	40	480	480	19	17	0.894737	Yes					20	0
808	Non-Small Cell Lung Cancer (NSCLC)	20	600	1200	1200	19	18	0.947368	Yes					44	0
809	Colon Cancer	50	182	364	364	19	17	0.894737	Yes					25	0
810	Colon Cancer	40	40	40	0	19	0	0	Yes					0	0
811	Breast Cancer - Invasive	80	77	462	462	2	2	1	Yes					3	0
812	Breast Cancer - Invasive	60	6	0	48	2	2	1	Yes					8	0
813	Soft Tissue Sarcoma - Gastrointestinal Stromal Tumors (GIST)	70	560	1120	1120	2	2	1	Yes					14	0
814	Non-Small Cell Lung Cancer (NSCLC)	30	143	572	572	21	2	0.0952381	Yes					19	0
815	Breast Cancer - Invasive	75	230	460	460	19	15	0.789474	Yes					29	0
816	Colon Cancer	40	700	1400	1400	19	13	0.684211	Yes					15	0
817	Appendix	30	616	1232	1232	16	14	0.875	Yes					21	0
818	Kidney Cancer	40	375	750	750	19	17	0.894737	Yes					36	0
819	Non-Small Cell Lung Cancer (NSCLC)	70	280	560	560	0	0		Yes					15	0
820	Rectal Cancer	60	80	480	480	19	18	0.947368	Yes					28	0
821	Non-Small Cell Lung Cancer (NSCLC)	20	117	468	468	19	15	0.789474	Yes					16	0
822	Breast Cancer - Invasive	25	198	396	396	19	16	0.842105	Yes					24	0
823	Soft Tissue Sarcoma of the Extremity/Trunk	50	240	480	480	19	16	0.842105	Yes					17	0
824	Pancreatic Adenocarcinoma	20	323	646	646	3	3	1	Yes					5	0
825	Non-Small Cell Lung Cancer (NSCLC)	50	238	476	476	3	3	1	Yes					26	0
826	Melanoma	50	126	504	504	3	3	1	Yes					14	0
827	Small Cell Lung Cancer (SCLC)	80	42	504	0	21	2	0.0952381	Yes					11	0
828	Anal Carcinoma	25	80	480	480	0	0		Yes					15	0
829	Appendix	5	440	880	880	19	15	0.789474	Yes					10	0
830	Breast Cancer - Invasive	70	4	24	0	19	0	0	Yes					0	0
831	Ovarian Cancer – Epithelial Ovarian Cancer/Fallopian Tube Cancer/Primary Peritoneal Cancer	50	78	468	468	21	18	0.857143	Yes					28	0
832	Thymomas and Thymic Carcinomas	70	64	192	0	0	0		Yes					15	0
833	Non-Small Cell Lung Cancer (NSCLC)	20	72	432	432	2	2	1	Yes					15	0
834	Carcinoma of Unknown Primary	90	176	352	352	19	17	0.894737	Yes					15	0
835	Non-Small Cell Lung Cancer (NSCLC)	15	620	1240	1240	19	14	0.736842	Yes					15	0
836	Colon Cancer	40	220	440	440	19	16	0.842105	Yes					20	0
837	Non-Small Cell Lung Cancer (NSCLC)	80	288	576	576	19	0	0	Yes					14	0
838	Non-Small Cell Lung Cancer (NSCLC)	30	60	480	480	19	15	0.789474	Yes					18	0
839	Breast Cancer - Invasive	50	52	520	260	21	2	0.0952381	Yes					24	0
840	Non-Small Cell Lung Cancer (NSCLC)	40	594	1188	1188	19	14	0.736842	Yes					29	0
841	Non-Small Cell Lung Cancer (NSCLC)	50	9	504	144	19	0	0	Yes					12	0
842	Neuroendocrine Tumors - Poorly Differentiated (High-Grade or Anaplastic)/Small Cell	80	209	418	418	19	13	0.684211	No					8	0
843	Esophageal and Esophagogastric Junction Cancers	50	140	560	560	1	0	0	Yes					37	0
844	Synovial Sarcoma	70	405	810	810	0	0		Yes					16	0
845	Pancreatic Adenocarcinoma	80	77	462	462	19	17	0.894737	Yes					33	0
846	Soft Tissue Sarcoma of the Extremity/Trunk	70	304	608	608	19	13	0.684211	Yes					29	0
847	Head and Neck Cancers - Cancer of the Oropharynx	40	126	504	504	19	12	0.631579	Yes					24	0
848	Breast Cancer - Invasive	80	180	360	360	7	7	1	Yes					32	0
849	Pancreatic Adenocarcinoma	50	156	624	624	19	18	0.947368	Yes					26	0
850	Non-Small Cell Lung Cancer (NSCLC)	75	130	520	520	2	2	1	Yes					7	0
851	Non-Small Cell Lung Cancer (NSCLC)	70	176	352	352	2	2	1	Yes					14	0
852	Breast Cancer - Invasive	50	420	840	840	2	2	1	Yes					0	0
853	Pancreatic Adenocarcinoma	15	45	540	540	3	3	1	Yes					8	0
854	Non-Small Cell Lung Cancer (NSCLC)	40	110	440	440	9	8	0.888889	Yes					23	0
855	Non-Small Cell Lung Cancer (NSCLC)	10	84	504	504	4	4	1	Yes					18	0
856	Urothelial Carcinoma	70	450	900	900	2	2	1	Yes					15	0
857	Hepatobiliary Cancers - Intrahepatic Cholangiocarcinoma	30	60	480	480	2	2	1	Yes					22	0
858	Non-Small Cell Lung Cancer (NSCLC)	70	49	637	0	19	0	0	Yes					7	0
859	Non-Small Cell Lung Cancer (NSCLC)	40	38	532	532	3	3	1	Yes					22	0
860	Uterine Neoplasms - Endometrial Carcinoma	40	80	480	480	19	16	0.842105	Yes					29	0
861	Central Nervous System Cancers - Low grade astrocytoma	30	132	528	528	0	0		No					0	0
862	Pancreatic Adenocarcinoma	60	667	1334	1334	19	14	0.736842	Yes					16	0
863	Kidney Cancer	80	224	448	448	2	2	1	Yes					4	0
864	Non-Small Cell Lung Cancer (NSCLC)	20	320	640	640	19	18	0.947368	Yes					29	0
865	Neuroendocrine Tumors - Poorly Differentiated (High-Grade or Anaplastic)/Small Cell	70	520	1040	1040	19	17	0.894737	Yes					27	0
866	Non-Small Cell Lung Cancer (NSCLC)	40	416	832	832	19	15	0.789474	Yes					19	0
867	Gastric Cancer	60	140	560	560	19	18	0.947368	Yes					12	0
868	Breast Cancer - Invasive	60	12	504	504	19	19	1	Yes					39	0
869	Non-Small Cell Lung Cancer (NSCLC)	35	30	390	480	0	0		Yes					9	0
870	Breast Cancer - Invasive	90	135	540	540	0	0		Yes					20	0
871	Colon Cancer	30	240	480	480	19	17	0.894737	Yes					20	0
872	Appendix	40	192	384	384	19	13	0.684211	Yes					27	0
873	Thymomas and Thymic Carcinomas	75	272	544	544	19	18	0.947368	Yes					18	0
874	Ewing's Sarcoma	70	36	504	504	19	18	0.947368	Yes					35	0
875	Non-Small Cell Lung Cancer (NSCLC)	35	64	512	512	19	16	0.842105	Yes					32	0
876	Non-Small Cell Lung Cancer (NSCLC)	70	529	1058	1058	19	16	0.842105	Yes					21	0
877	Rectal Cancer	15	208	416	416	3	3	1	Yes					15	0
878	Breast Cancer - Invasive	40	408	816	816	2	2	1	Yes					15	0
879	Rectal Cancer	50	104	416	416	2	2	1	Yes					10	0
880	Non-Small Cell Lung Cancer (NSCLC)	40	460	920	920	2	2	1	Yes					9	0
881	Merkel Cell Carcinoma	40	252	504	504	19	17	0.894737	Yes					27	0
882	Bladder Cancer	30	255	510	510	19	17	0.894737	Yes					33	0
883	Non-Small Cell Lung Cancer (NSCLC)	80	84	504	504	19	16	0.842105	Yes					35	0
884	Non-Small Cell Lung Cancer (NSCLC)	50	620	1240	1240	19	15	0.789474	Yes					28	0
885	Non-Small Cell Lung Cancer (NSCLC)	20	144	576	576	3	3	1	Yes					15	0
886	Anal Carcinoma	60	110	440	440	19	15	0.789474	Yes					39	0
887	Breast Cancer - Invasive	60	48	480	480	19	19	1	Yes					21	0
888	Pancreatic Adenocarcinoma	40	300	600	600	19	15	0.789474	Yes					17	0
889	Breast Cancer - Invasive	80	6	168	0	19	0	0	Yes					12	0
890	Colon Cancer	35	460	920	920	21	2	0.0952381	Yes					24	0
891	Breast Cancer - Invasive	70	56	448	448	2	2	1	No					0	0
892	Carcinoma of Unknown Primary	20	66	528	528	19	17	0.894737	Yes					17	0
893	Breast Cancer - Invasive	45	112	448	448	3	3	1	Yes					5	0
894	Breast Cancer - Invasive	80	196	392	392	4	3	0.75	Yes					14	0
895	Breast Cancer - Invasive	80	396	792	792	4	4	1	Yes					12	0
896	Gastric Cancer	50	504	1008	1008	19	16	0.842105	Yes					22	0
897	Breast Cancer - Invasive	90	63	504	504	19	16	0.842105	Yes					43	0
898	Carcinoma of Unknown Primary	40	10	80	0	19	0	0	Yes					3	0
899	Non-Small Cell Lung Cancer (NSCLC)	20	690	1380	1380	19	19	1	Yes					35	0
900	Adenoid cystic carcinoma	80	330	660	660	19	15	0.789474	Yes					14	0
901	Breast Cancer - Invasive	40	99	594	594	19	0	0	Yes					18	0
902	Head and Neck Cancers - Cancer of the Glottic Larynx	70	120	480	480	2	2	1	Yes					0	0
903	Lung Neuroendocrine Tumors	90	256	0	0	2	2	1	Yes					17	0
904	Breast Cancer - Invasive	80	432	864	864	2	2	1	Yes					26	0
905	Bladder Cancer	50	156	624	0	21	2	0.0952381	No					0	0
906	Non-Small Cell Lung Cancer (NSCLC)	50	117	468	468	19	14	0.736842	Yes					10	0
907	Non-Small Cell Lung Cancer (NSCLC)	50	266	532	532	19	17	0.894737	Yes					33	0
908	Carcinoma of Unknown Primary	90	306	612	612	2	2	1	Yes					7	0
909	Neuroendocrine Tumors - Poorly Differentiated (High-Grade or Anaplastic)/Small Cell	40	99	594	594	19	17	0.894737	Yes					32	0
910	Esophageal and Esophagogastric Junction Cancers	30	399	798	798	2	2	1	Yes					2	0
911	Leiomyosarcoma, NOS	70	48	480	480	2	2	1	Yes					8	0
912	Non-Small Cell Lung Cancer (NSCLC)	80	54	540	540	19	12	0.631579	Yes					29	0
913	Breast Cancer - Invasive	70	156	624	624	19	18	0.947368	Yes					35	0
914	Lung Neuroendocrine Tumors	70	42	504	504	2	2	1	Yes					28	0
915	Soft Tissue Sarcoma of the Extremity/Trunk	90	196	392	392	2	2	1	Yes					8	0
916	Breast Cancer - Invasive	90	150	300	300	2	2	1	Yes					11	0
917	Breast Cancer - Invasive	75	525	1050	1050	3	3	1	Yes					8	0
918	Mesothelioma Pleura	80	48	480	480	1	0	0	Yes					22	0
919	Breast Cancer - Invasive	70	240	480	480	19	16	0.842105	Yes					26	0
920	Breast Cancer - Invasive	80	460	920	920	1	1	1	Yes					22	0
921	Non-Melanoma Skin Cancers - Squamous Cell Skin Cancers	60	24	480	480	19	18	0.947368	Yes					15	0
922	Non-Small Cell Lung Cancer (NSCLC)	35	216	432	432	19	17	0.894737	Yes					27	0
923	Non-Small Cell Lung Cancer (NSCLC)	60	45	540	540	19	0	0	Yes					18	0
924	Non-Small Cell Lung Cancer (NSCLC)	60	195	390	390	19	16	0.842105	Yes					18	0
925	Melanoma	20	532	1064	1064	19	15	0.789474	Yes					42	0
926	Non-Small Cell Lung Cancer (NSCLC)	30	36	504	504	19	0	0	Yes					15	0
927	Pancreatic Adenocarcinoma	30	56	448	448	19	17	0.894737	Yes					16	0
928	Ovarian Cancer – Epithelial Ovarian Cancer/Fallopian Tube Cancer/Primary Peritoneal Cancer	60	396	792	792	19	15	0.789474	Yes					21	0
929	Breast Cancer - Invasive	75	266	532	532	19	16	0.842105	Yes					27	0
930	Colon Cancer	40	280	560	560	0	0		Yes					12	0
931	Breast Cancer - Invasive	40	36	72	0	19	0	0	Yes					11	0
932	Central Nervous System Cancers - Glioblastoma	95	132	528	528	21	0	0	Yes					12	0
933	Colon Cancer	35	160	640	640	2	2	1	Yes					11	0
934	Uterine Neoplasms - Endometrial Carcinoma	35	240	480	480	2	2	1	Yes					12	0
935	Melanoma	80	390	780	780	4	4	1	Yes					21	0
936	Colon Cancer	50	78	468	468	19	18	0.947368	Yes					40	0
937	Non-Small Cell Lung Cancer (NSCLC)	10	500	1000	1000	19	14	0.736842	Yes					32	0
938	Pancreatic Adenocarcinoma	30	336	672	672	1	1	1	Yes					19	0
939	Ovarian Cancer – Epithelial Ovarian Cancer/Fallopian Tube Cancer/Primary Peritoneal Cancer	60	288	576	576	19	16	0.842105	Yes					29	0
940	Breast Cancer - Invasive	10	378	756	756	19	15	0.789474	Yes					21	0
941	Non-Small Cell Lung Cancer (NSCLC)	30	144	288	0	1	1	1	Yes					9	0
942	Non-Small Cell Lung Cancer (NSCLC)	70	575	1150	1150	19	17	0.894737	Yes					41	0
943	Leiomyosarcoma, uterus	90	64	512	0	0	0		Yes					13	0
944	Breast Cancer - Invasive	60	67	536	536	3	3	1	Yes					28	0
945	Central Nervous System Cancers - Anaplastic Gliomas	90	154	616	616	2	2	1	Yes					15	0
946	Appendix	50	66	528	528	0	0		Yes					9	0
947	Colon Cancer	35	162	648	648	19	19	1	Yes					27	0
948	Neuroendocrine Tumors - Neuroendocrine Tumors of the Pancreas (Islet Cell Tumors)	80	220	440	440	19	18	0.947368	Yes					29	0
949	Rectal Cancer	40	240	480	480	4	4	1	Yes					14	0
950	Colon Cancer	70	15	510	165	19	0	0	Yes					3	0
951	Ovarian Cancer – Epithelial Ovarian Cancer/Fallopian Tube Cancer/Primary Peritoneal Cancer	75	500	1000	1000	19	17	0.894737	Yes					18	0
952	Appendix	10	102	408	408	19	15	0.789474	Yes					27	0
953	Non-Small Cell Lung Cancer (NSCLC)	70	98	588	588	19	16	0.842105	Yes					30	0
954	Breast Cancer - Invasive	80	99	0	297	2	2	1	Yes					2	0
955	Non-Small Cell Lung Cancer (NSCLC)	30	770	1540	1540	19	15	0.789474	Yes					24	0
956	Colon Cancer	40	52	520	520	0	0		Yes					17	0
957	Carcinoma of Unknown Primary	60	525	1050	1050	19	14	0.736842	Yes					18	0
958	Non-Small Cell Lung Cancer (NSCLC)	30	480	960	960	19	17	0.894737	Yes					27	0
959	Breast Cancer - Invasive	40	80	480	480	19	0	0	Yes					28	0
960	Carcinoma of Unknown Primary	5	112	448	448	19	16	0.842105	Yes					19	0
961	Breast Cancer - Invasive	40	270	540	540	19	15	0.789474	Yes					22	0
962	Colon Cancer	25	308	616	616	19	14	0.736842	Yes					21	0
963	Non-Small Cell Lung Cancer (NSCLC)	35	32	512	512	19	17	0.894737	Yes					31	0
964	Hepatobiliary Cancers - Hepatocellular Carcinoma	50	90	540	540	19	17	0.894737	Yes					29	0
965	Pancreatic Adenocarcinoma	70	88	528	528	19	17	0.894737	Yes					32	0
966	Non-Small Cell Lung Cancer (NSCLC)	50	60	480	480	1	0	0	Yes					22	0
967	Esophageal and Esophagogastric Junction Cancers	40	220	440	440	19	18	0.947368	Yes					18	0
968	Breast Cancer - Invasive	70	112	448	448	19	17	0.894737	Yes					32	0
969	Melanoma	50	120	480	480	19	15	0.789474	Yes					20	0
970	Uterine Neoplasms - Endometrial Carcinoma	70	30	0	240	1	1	1	Yes					2	0
971	Non-Small Cell Lung Cancer (NSCLC)	60	165	660	660	7	4	0.571429	Yes					26	0
972	Non-Small Cell Lung Cancer (NSCLC)	5	156	624	624	19	16	0.842105	Yes					24	0
973	Carcinoma of Unknown Primary	70	35	490	490	19	17	0.894737	Yes					14	0
974	Breast Cancer - Invasive	70	255	510	510	19	15	0.789474	Yes					39	0
975	Esophageal and Esophagogastric Junction Cancers	45	252	504	0	0	0		Yes					13	0
976	Carcinoma of Unknown Primary	95	418	836	836	19	11	0.578947	Yes					22	0
977	Non-Small Cell Lung Cancer (NSCLC)	15	96	576	576	21	2	0.0952381	Yes					18	0
978	Breast Cancer - Invasive	60	81	486	486	21	2	0.0952381	Yes					21	0
979	Non-Small Cell Lung Cancer (NSCLC)	30	49	490	980	6	5	0.833333	No					5	0
980	Non-Small Cell Lung Cancer (NSCLC)	90	91	546	546	19	16	0.842105	Yes					29	0
981	Liposarcoma	80	40	480	480	1	1	1	Yes					10	0
982	Breast Cancer - Invasive	90	220	440	440	2	2	1	Yes					32	0
983	Central Nervous System Cancers - Glioblastoma	50	132	792	0	1	1	1	Yes					8	0
984	Non-Small Cell Lung Cancer (NSCLC)	40	91	546	546	2	2	1	Yes					6	0
985	Small Cell Lung Cancer (SCLC)	98	374	3740	3740	21	2	0.0952381	Yes					11	0
986	Non-Small Cell Lung Cancer (NSCLC)	40	60	480	480	19	17	0.894737	Yes					30	0
987	Gastric Cancer	25	112	0	448	1	1	1	No					0	0
988	Uterine Neoplasms - Endometrial Carcinoma	70	49	490	490	1	1	1	Yes					17	0
989	Non-Small Cell Lung Cancer (NSCLC)	50	192	384	384	19	16	0.842105	Yes					14	0
990	Angiosarcoma	60	380	760	760	1	1	1	Yes					27	0
991	Colon Cancer	25	80	480	480	2	2	1	Yes					8	0
992	Non-Small Cell Lung Cancer (NSCLC)	80	225	450	450	4	4	1	Yes					23	0
993	Breast Cancer - Invasive	50	405	810	810	19	15	0.789474	Yes					8	0
994	Carcinoma of Unknown Primary	50	30	480	480	19	15	0.789474	Yes					31	0
995	Hepatobiliary Cancers - Intrahepatic Cholangiocarcinoma	80	140	560	560	19	16	0.842105	Yes					32	0
996	Non-Small Cell Lung Cancer (NSCLC)	80	384	768	768	19	15	0.789474	Yes					12	0
997	Breast Cancer - Invasive	50	187	374	374	19	17	0.894737	Yes					26	0
998	Urothelial Carcinoma	50	567	1134	1134	19	15	0.789474	Yes					21	0
999	Carcinoma of Unknown Primary	70	130	520	520	19	17	0.894737	Yes					43	0
1000	Breast Cancer - Invasive	20	143	572	572	19	18	0.947368	Yes					41	0
1001	Breast Cancer - Invasive	75	30	480	450	19	0	0	Yes					20	0
1002	Non-Small Cell Lung Cancer (NSCLC)	40	429	858	858	19	14	0.736842	Yes					27	0
1003	Adenoid cystic carcinoma	70	42	462	0	19	0	0	Yes					2	0
1004	Thymomas and Thymic Carcinomas	70	630	1260	1260	19	19	1	Yes					31	0
1005	Neuroendocrine Tumors - Neuroendocrine Tumors of the Pancreas (Islet Cell Tumors)	30	475	950	950	19	12	0.631579	Yes					24	0
1006	Bladder Cancer	70	104	416	416	19	16	0.842105	Yes					26	0
1007	Small Cell Lung Cancer (SCLC)	50	324	648	648	19	17	0.894737	Yes					21	0
1008	Non-Small Cell Lung Cancer (NSCLC)	20	98	588	588	19	17	0.894737	Yes					25	0
1009	Non-Small Cell Lung Cancer (NSCLC)	45	3	174	0	0	0		Yes					0	0
1010	Non-Small Cell Lung Cancer (NSCLC)	30	256	512	512	2	2	1	Yes					10	0
1011	Non-Small Cell Lung Cancer (NSCLC)	70	256	512	512	1	1	1	Yes					8	0
1012	Breast Cancer - Invasive	60	340	680	680	3	3	1	Yes					25	0
1013	Breast Cancer - Invasive	70	132	528	528	1	1	1	Yes					16	0
1014	Carcinoma of Unknown Primary	60	247	494	494	0	0		Yes					23	0
1015	Pancreatic Adenocarcinoma	40	400	800	800	19	14	0.736842	Yes					35	0
1016	Breast Cancer - Invasive	30	15	375	0	21	0	0	No					0	0
1017	Soft Tissue Sarcoma - Retroperitoneal/ Intra-abdominal	50	104	416	416	1	1	1	Yes					27	0
1018	Colon Cancer	30	450	900	900	19	17	0.894737	Yes					35	0
1019	Non-Small Cell Lung Cancer (NSCLC)	30	368	736	736	19	16	0.842105	Yes					30	0
1020	Gastric Cancer	25	14	504	252	19	17	0.894737	Yes					39	0
1021	Esophageal and Esophagogastric Junction Cancers	60	256	512	512	2	2	1	No					0	0
1022	Breast Cancer - Invasive	80	14	392	0	19	0	0	Yes					3	0
1023	Hepatobiliary Cancers - Intrahepatic Cholangiocarcinoma	60	210	210	0	19	0	0	Yes					0	0
1024	Non-Small Cell Lung Cancer (NSCLC)	40	208	416	416	19	17	0.894737	Yes					26	0
1025	Non-Small Cell Lung Cancer (NSCLC)	80	126	504	504	7	6	0.857143	Yes					32	0
1026	Rectal Cancer	75	69	552	552	19	16	0.842105	Yes					16	0
1027	Bladder Cancer	70	42	504	504	19	19	1	Yes					28	0
1028	Non-Small Cell Lung Cancer (NSCLC)	35	72	432	432	10	8	0.8	Yes					25	0
1029	Breast Cancer - Invasive	40	90	540	630	0	0		Yes					6	0
1030	Non-Small Cell Lung Cancer (NSCLC)	3	99	594	594	19	16	0.842105	Yes					35	0
1031	Breast Cancer - Invasive	65	110	440	440	5	3	0.6	Yes					31	0
1032	Neuroendocrine Tumors - Poorly Differentiated (High-Grade or Anaplastic)/Small Cell	95	90	540	540	2	2	1	Yes					23	0
1033	Breast Cancer - Invasive	30	550	1100	1100	3	3	1	Yes					20	0
1034	Non-Small Cell Lung Cancer (NSCLC)	85	99	594	594	21	2	0.0952381	Yes					17	0
1035	Ovarian Cancer – Epithelial Ovarian Cancer/Fallopian Tube Cancer/Primary Peritoneal Cancer	75	408	816	816	19	18	0.947368	Yes					36	0
1036	Breast Cancer - Invasive	40	72	432	432	21	0	0	Yes					36	0
1037	Non-Small Cell Lung Cancer (NSCLC)	70	252	504	504	2	2	1	Yes					20	0
1038	Pancreatic Adenocarcinoma	10	63	504	504	19	19	1	Yes					34	0
1039	Breast Cancer - Invasive	60	81	486	486	19	17	0.894737	Yes					34	0
1040	Breast Cancer - Invasive	70	252	504	504	0	0		Yes					25	0
1041	Neuroendocrine Tumors - Neuroendocrine Tumors of the Pancreas (Islet Cell Tumors)	60	540	1080	1080	19	15	0.789474	Yes					21	0
1042	Neuroendocrine Tumors - Adrenal Gland Tumors	50	330	660	660	19	17	0.894737	Yes					42	0
1043	Mesothelioma Pleura	5	638	1276	1276	19	17	0.894737	Yes					48	0
1044	Non-Small Cell Lung Cancer (NSCLC)	30	240	2400	2400	2	1	0.5	Yes					20	0
1045	Uterine Neoplasms - Endometrial Carcinoma	60	192	384	384	1	1	1	Yes					17	0
1046	Uterine Neoplasms - Endometrial Carcinoma	60	240	480	480	1	1	1	Yes					24	0
1047	Ovarian Cancer – Epithelial Ovarian Cancer/Fallopian Tube Cancer/Primary Peritoneal Cancer	60	324	648	648	1	1	1	Yes					11	0
1048	Ovarian Cancer – Epithelial Ovarian Cancer/Fallopian Tube Cancer/Primary Peritoneal Cancer	50	48	480	480	1	1	1	Yes					2	0
1049	Uterine Neoplasms - Endometrial Carcinoma	80	99	2574	2574	1	1	1	Yes					5	0
1050	Ovarian Cancer – Epithelial Ovarian Cancer/Fallopian Tube Cancer/Primary Peritoneal Cancer	90	24	480	1248	1	1	1	Yes					28	0
1051	Non-Small Cell Lung Cancer (NSCLC)	20	600	1200	1200	19	14	0.736842	Yes					21	0
1052	Colon Cancer	60	338	676	676	19	16	0.842105	Yes					19	0
1053	Gastric Cancer	80	54	540	540	19	15	0.789474	Yes					16	0
1054	Esophageal and Esophagogastric Junction Cancers	80	432	864	864	19	17	0.894737	Yes					27	0
1055	Kidney Cancer	90	70	560	560	19	15	0.789474	Yes					35	0
1056	Prostate Cancer	40	270	540	540	19	15	0.789474	Yes					23	0
1057	Non-Melanoma Skin Cancers - Squamous Cell Skin Cancers	80	91	546	546	21	2	0.0952381	Yes					24	0
1058	Adenoid cystic carcinoma	80	792	1584	1584	19	17	0.894737	Yes					27	0
1059	Leiomyosarcoma, NOS	95	30	0	390	19	1	0.0526316	Yes					21	0
1060	Breast Cancer - Invasive	50	102	408	408	19	16	0.842105	Yes					25	0
1061	Kidney Cancer	25	273	546	546	19	17	0.894737	Yes					25	0
1062	Esophageal and Esophagogastric Junction Cancers	20	110	440	440	19	16	0.842105	Yes					15	0
1063	Non-Small Cell Lung Cancer (NSCLC)	40	621	1242	1242	19	18	0.947368	Yes					18	0
1064	Breast Cancer - Invasive	50	144	576	576	19	14	0.736842	Yes					11	0
1065	Breast Cancer - Invasive	50	378	756	756	1	1	1	Yes					11	0
1066	Carcinoma of Unknown Primary	70	598	1196	1196	2	2	1	Yes					20	0
1067	Colon Cancer	40	42	504	252	19	0	0	Yes					13	0
1068	Pancreatic Adenocarcinoma	25	288	576	576	2	2	1	Yes					7	0
1069	Central Nervous System Cancers - Glioblastoma	70	36	504	504	19	14	0.736842	Yes					27	0
1070	Kidney Cancer	50	598	1196	1196	19	17	0.894737	Yes					44	0
1071	Carcinoma of Unknown Primary	80	540	1080	1080	19	15	0.789474	Yes					38	0
1072	Chondrosarcoma	20	196	392	392	8	4	0.5	Yes					31	0
1073	Non-Small Cell Lung Cancer (NSCLC)	20	84	504	504	1	1	1	Yes					27	0
1074	Uterine Neoplasms - Endometrial Carcinoma	30	240	480	480	3	3	1	Yes					18	0
1075	Hepatobiliary Cancers - Hepatocellular Carcinoma	40	25	500	500	2	2	1	Yes					26	0
1076	Rectal Cancer	25	192	384	384	1	1	1	Yes					21	0
1077	Breast Cancer - Invasive	50	256	512	512	1	1	1	Yes					33	0
1078	Colon Cancer	40	126	504	504	19	13	0.684211	Yes					8	0
1079	Non-Small Cell Lung Cancer (NSCLC)	25	70	560	560	21	2	0.0952381	Yes					24	0
1080	Breast Cancer - Invasive	40	540	1080	1080	19	15	0.789474	Yes					31	0
1081	Breast Cancer - Invasive	80	198	396	396	19	16	0.842105	Yes					19	0
1082	Ovarian Cancer – Epithelial Ovarian Cancer/Fallopian Tube Cancer/Primary Peritoneal Cancer	90	99	594	594	19	16	0.842105	Yes					30	0
1083	Head and Neck Cancers - Cancer of the Supraglottic Larynx	60	285	570	570	19	17	0.894737	Yes					43	0
1084	Prostate Cancer	10	154	616	616	19	15	0.789474	Yes					40	0
1085	Uterine Neoplasms - Endometrial Carcinoma	90	189	378	378	19	14	0.736842	Yes					29	0
1086	Colon Cancer	60	12	504	504	5	4	0.8	Yes					26	0
1087	Non-Small Cell Lung Cancer (NSCLC)	35	102	408	408	19	17	0.894737	Yes					48	0
1088	Breast Cancer - Invasive	70	224	448	448	19	17	0.894737	Yes					19	0
1089	Uterine Neoplasms - Endometrial Carcinoma	55	56	448	448	19	16	0.842105	Yes					13	0
1090	Breast Cancer - Invasive	40	80	480	480	1	1	1	Yes					0	0
1091	Pancreatic Adenocarcinoma	70	342	684	684	1	1	1	Yes					29	0
1092	Colon Cancer	5	360	720	720	19	14	0.736842	Yes					30	0
1093	Breast Cancer - Invasive	80	180	360	360	19	17	0.894737	Yes					32	0
1094	Non-Small Cell Lung Cancer (NSCLC)	30	437	874	874	19	14	0.736842	Yes					28	0
1095	Non-Small Cell Lung Cancer (NSCLC)	90	483	966	966	19	15	0.789474	Yes					25	0
1096	Breast Cancer - Invasive	60	198	396	396	19	18	0.947368	Yes					49	0
1097	Carcinoma of Unknown Primary	60	90	540	540	6	5	0.833333	Yes					27	0
1098	Non-Small Cell Lung Cancer (NSCLC)	70	117	0	468	19	0	0	Yes					6	0
1099	Colon Cancer	30	77	462	462	9	6	0.666667	Yes					30	0
1100	Ovarian Cancer – Epithelial Ovarian Cancer/Fallopian Tube Cancer/Primary Peritoneal Cancer	50	224	448	448	9	8	0.888889	Yes					30	0
1101	Ovarian Cancer – Epithelial Ovarian Cancer/Fallopian Tube Cancer/Primary Peritoneal Cancer	80	132	528	528	19	17	0.894737	Yes					44	0
1102	Colon Cancer	40	150	600	600	2	2	1	Yes					17	0
1103	Hemangioendothelioma	30	616	1232	1232	19	17	0.894737	Yes					37	0
1104	Small intestine cancer	60	184	368	368	2	1	0.5	Yes					33	0
1105	Non-Small Cell Lung Cancer (NSCLC)	20	152	608	608	19	18	0.947368	Yes					40	0
1106	Central Nervous System Cancers - Glioblastoma	90	620	1240	1240	19	18	0.947368	Yes					29	0
1107	Central Nervous System Cancers - Glioblastoma	60	180	360	360	19	18	0.947368	Yes					25	0
1108	Breast Cancer - Invasive	40	234	468	468	2	2	1	Yes					20	0
1109	Bladder Cancer	60	440	880	880	1	1	1	Yes					1	0
1110	Non-Small Cell Lung Cancer (NSCLC)	60	324	648	648	2	2	1	Yes					9	0
1111	Pancreatic Adenocarcinoma	70	420	840	840	21	16	0.761905	Yes					36	0
1112	Central Nervous System Cancers - Glioblastoma	80	480	960	960	19	14	0.736842	Yes					28	0
1113	Osteosarcoma	80	506	1012	1012	19	15	0.789474	Yes					24	0
1114	Breast Cancer - Invasive	80	5	155	0	19	0	0	Yes					6	0
1115	Breast Cancer - Invasive	70	640	1280	1280	19	16	0.842105	Yes					21	0
1116	Hepatobiliary Cancers - Gallbladder Cancer	40	143	572	572	3	3	1	Yes					26	0
1117	Uterine Neoplasms - Endometrial Carcinoma	40	285	570	570	1	0	0	Yes					26	0
1118	Esophageal and Esophagogastric Junction Cancers	40	500	1000	1000	19	14	0.736842	Yes					13	0
1119	Pancreatic Adenocarcinoma	80	525	1050	1050	0	0		Yes					8	0
1120	Thymomas and Thymic Carcinomas	80	238	476	476	19	18	0.947368	Yes					23	0
1121	Pancreatic Adenocarcinoma	25	78	78	0	19	0	0	Yes					5	0
1122	Ovarian Cancer – Epithelial Ovarian Cancer/Fallopian Tube Cancer/Primary Peritoneal Cancer	40	210	420	420	19	17	0.894737	Yes					28	0
1123	Non-Small Cell Lung Cancer (NSCLC)	20	161	644	644	23	21	0.913043	Yes					32	0
1124	Breast Cancer - Invasive	90	255	510	510	2	2	1	Yes					18	0
1125	Non-Small Cell Lung Cancer (NSCLC)	70	378	756	756	3	3	1	Yes					16	0
1126	Non-Small Cell Lung Cancer (NSCLC)	50	320	640	640	1	1	1	Yes					14	0
1127	Breast Cancer - Invasive	90	208	416	416	19	15	0.789474	Yes					20	0
1128	Non-Small Cell Lung Cancer (NSCLC)	10	588	1176	1176	19	17	0.894737	Yes					34	0
1129	Soft Tissue Sarcoma - Retroperitoneal/ Intra-abdominal	70	90	540	540	19	15	0.789474	Yes					32	0
1130	Appendix	70	476	952	952	16	11	0.6875	Yes					35	0
1131	Colon Cancer	40	322	644	644	19	17	0.894737	Yes					36	0
1132	Osteosarcoma	70	600	1200	1200	19	17	0.894737	Yes					41	0
1133	Carcinoma of Unknown Primary	80	110	440	660	19	17	0.894737	Yes					41	0
1134	Head and Neck Cancers - Cancer of the Oropharynx	50	90	540	0	1	1	1	Yes					16	0
1135	Breast Cancer - Invasive	80	272	544	544	19	18	0.947368	Yes					12	0
1136	Vulva	60	504	1008	1008	0	0		Yes					32	0
1137	Germ Cell Tumors	60	483	966	966	19	15	0.789474	Yes					35	0
1138	Breast Cancer - Invasive	80	308	616	616	0	0		Yes					14	0
1139	Thymomas and Thymic Carcinomas	80	323	646	646	1	1	1	Yes					30	0
1140	Uterine Neoplasms - Endometrial Carcinoma	40	374	748	748	19	16	0.842105	Yes					12	0
1141	Carcinoma of Unknown Primary	60	572	1144	1144	19	17	0.894737	Yes					32	0
1142	Parotid	80	256	512	512	1	1	1	Yes					12	0
1143	Breast Cancer - Invasive	80	73	438	438	1	1	1	Yes					8	0
1144	Breast Cancer - Invasive	70	96	576	576	4	4	1	Yes					22	0
1145	Rectal Cancer	40	208	416	416	2	2	1	Yes					8	0
1146	Breast Cancer - Invasive	70	32	512	512	1	1	1	Yes					12	0
1147	Neuroendocrine Tumors - Neuroendocrine Tumors of the GI Tract, Lung, and Thymus	30	360	720	720	19	18	0.947368	Yes					55	0
1148	Small Cell Lung Cancer (SCLC)	70	196	392	392	19	15	0.789474	Yes					29	0
1149	Neuroendocrine Tumors - Neuroendocrine Tumors of the Pancreas (Islet Cell Tumors)	60	770	1540	1540	19	14	0.736842	Yes					36	0
1150	Carcinoma of Unknown Primary	15	108	432	432	19	18	0.947368	Yes					32	0
1151	Non-Small Cell Lung Cancer (NSCLC)	60	323	646	646	19	18	0.947368	Yes					43	0
1152	NHL - Diffuse Large B-Cell Lymphoma	70	120	480	480	6	5	0.833333	Yes					25	0
1153	non-Melanoma Skin Cancers - Basal Cell Skin Cancers	20	8	216	0	19	0	0	Yes					4	0
1154	Cervical Cancer	40	48	480	480	6	6	1	Yes					22	0
1155	Soft Tissue Sarcoma - Retroperitoneal/ Intra-abdominal	95	4	208	0	19	0	0	Yes					0	0
1156	Carcinoma of Unknown Primary	70	25	250	0	0	0		Yes					25	0
1157	Breast Cancer - Invasive	50	121	484	484	1	1	1	Yes					25	0
1158	Ovarian Cancer – Epithelial Ovarian Cancer/Fallopian Tube Cancer/Primary Peritoneal Cancer	40	532	1064	1064	19	16	0.842105	Yes					16	0
1159	Colon Cancer	50	42	504	504	19	17	0.894737	Yes					9	0
1160	Breast Cancer - Invasive	60	228	456	456	19	15	0.789474	Yes					21	0
1161	Non-Small Cell Lung Cancer (NSCLC)	35	450	900	900	19	17	0.894737	Yes					26	0
1162	Soft Tissue Sarcoma of the Extremity/Trunk	50	156	624	624	10	8	0.8	Yes					35	0
1163	Lung Neuroendocrine Tumors	80	418	836	836	19	16	0.842105	Yes					35	0
1164	Prostate Cancer	15	468	936	936	19	16	0.842105	Yes					28	0
1165	Soft Tissue Sarcoma of the Extremity/Trunk	60	240	480	480	19	17	0.894737	Yes					32	0
1166	Head and Neck Cancers - Cancer of the Nasopharynx	60	90	540	540	19	17	0.894737	Yes					37	0
1167	Soft Tissue Sarcoma - Retroperitoneal/ Intra-abdominal	60	875	1750	1750	19	15	0.789474	Yes					25	0
1168	Parotid	40	374	748	748	1	1	1	Yes					15	0
1169	Breast Cancer - Invasive	20	200	400	400	2	2	1	Yes					7	0
1170	Cervical Cancer	60	32	512	512	1	1	1	Yes					7	0
1171	Colon Cancer	60	425	850	850	1	1	1	Yes					0	0
1172	Breast Cancer - Invasive	70	120	480	480	19	16	0.842105	Yes					18	0
1173	Non-Small Cell Lung Cancer (NSCLC)	30	221	442	442	19	15	0.789474	Yes					22	0
1174	Non-Small Cell Lung Cancer (NSCLC)	60	391	782	782	19	17	0.894737	Yes					17	0
1175	Breast Cancer - Invasive	35	551	1102	1102	19	17	0.894737	Yes					32	0
1176	Uterine Neoplasms - Endometrial Carcinoma	40	198	396	396	19	16	0.842105	Yes					25	0
1177	Uterine Neoplasms - Endometrial Carcinoma	30	340	680	680	19	17	0.894737	Yes					28	0
1178	Anal Carcinoma	70	90	540	540	5	5	1	Yes					25	0
1179	Hemangioma	80	126	504	504	1	1	1	Yes					38	0
1180	Non-Small Cell Lung Cancer (NSCLC)	60	140	560	560	16	12	0.75	Yes					34	0
1181	Bladder Cancer	90	667	1334	1334	16	14	0.875	Yes					25	0
1182	Non-Small Cell Lung Cancer (NSCLC)	70	300	600	600	19	14	0.736842	Yes					23	0
1183	Non-Small Cell Lung Cancer (NSCLC)	80	374	748	748	19	16	0.842105	Yes					30	0
1184	Breast Cancer - Invasive	80	56	448	448	19	18	0.947368	Yes					25	0
1185	Breast Cancer - Invasive	70	48	480	480	1	1	1	Yes					0	0
1186	Anal Carcinoma	60	288	576	576	2	2	1	Yes					23	0
1187	Non-Small Cell Lung Cancer (NSCLC)	20	375	750	750	19	16	0.842105	Yes					19	0
1188	Basaloid carcinomas	70	24	480	480	7	7	1	Yes					32	0
1189	Hepatobiliary Cancers - Intrahepatic Cholangiocarcinoma	50	266	532	532	19	16	0.842105	Yes					34	0
1190	Breast Cancer - Invasive	60	90	540	540	19	0	0	Yes					15	0
1191	Spindle Cell Sarcoma	80	216	432	432	2	2	1	Yes					14	0
1192	Soft Tissue Sarcoma of the Extremity/Trunk	90	450	900	900	19	16	0.842105	Yes					18	0
1193	Melanoma	40	35	490	490	21	2	0.0952381	Yes					29	0
1194	Non-Melanoma Skin Cancers- Adnexal Tumors	40	143	572	572	19	17	0.894737	Yes					21	0
1195	Non-Small Cell Lung Cancer (NSCLC)	20	221	442	442	19	15	0.789474	Yes					9	0
1196	Small Cell Lung Cancer (SCLC)	40	209	418	418	19	18	0.947368	Yes					33	0
1197	Bladder Cancer	20	306	612	612	1	1	1	Yes					7	0
1198	Soft Tissue Sarcoma - Retroperitoneal/ Intra-abdominal	90	91	546	546	2	2	1	Yes					12	0
1199	Non-Small Cell Lung Cancer (NSCLC)	95	440	880	880	19	16	0.842105	Yes					22	0
1200	Anal Carcinoma	60	21	504	504	19	15	0.789474	Yes					14	0
1201	Esophageal and Esophagogastric Junction Cancers	15	63	504	504	8	7	0.875	Yes					27	0
1202	Neuroendocrine Tumors - Poorly Differentiated (High-Grade or Anaplastic)/Small Cell	80	54	2160	0	19	0	0	Yes					0	0
1203	Uterine Neoplasms - Endometrial Carcinoma	50	272	2720	2720	1	1	1	Yes					14	0
1204	Soft Tissue Sarcoma - Gastrointestinal Stromal Tumors (GIST)	80	224	448	448	19	16	0.842105	Yes					13	0
1205	Breast Cancer - Invasive	40	225	450	450	1	1	1	Yes					32	0
1206	Non-Small Cell Lung Cancer (NSCLC)	70	136	544	544	19	16	0.842105	Yes					12	0
1207	Carcinoma of Unknown Primary	20	35	490	490	17	12	0.705882	Yes					16	0
1208	Colon Cancer	40	165	3300	3300	19	17	0.894737	Yes					23	0
1209	Melanoma	80	520	1040	1040	18	12	0.666667	Yes					29	0
1210	Small Cell Lung Cancer (SCLC)	80	550	1100	1100	19	17	0.894737	Yes					12	0
1211	Carcinoma of Unknown Primary	90	315	630	630	19	18	0.947368	Yes					32	0
1212	Non-Small Cell Lung Cancer (NSCLC)	25	240	480	480	19	16	0.842105	Yes					36	0
1213	Hepatobiliary Cancers - Hepatocellular Carcinoma	80	65	520	520	19	19	1	Yes					42	0
1214	Lung Neuroendocrine Tumors	80	588	1176	1176	19	17	0.894737	Yes					48	0
1215	Colon Cancer	40	64	512	768	19	0	0	Yes					16	0
1216	Thymomas and Thymic Carcinomas	90	270	540	540	19	19	1	Yes					27	0
1217	Kidney Cancer	80	672	1344	1344	19	16	0.842105	Yes					45	0
1218	Pancreatic Adenocarcinoma	70	221	442	442	6	4	0.666667	Yes					27	0
1219	Ovarian Cancer – Epithelial Ovarian Cancer/Fallopian Tube Cancer/Primary Peritoneal Cancer	80	143	572	572	17	14	0.823529	Yes					18	0
1220	Non-Small Cell Lung Cancer (NSCLC)	80	735	1470	1470	19	16	0.842105	Yes					17	0
1221	Breast Cancer - Invasive	30	340	680	680	19	16	0.842105	Yes					34	0
1222	Breast Cancer - Invasive	80	170	340	340	1	1	1	Yes					6	0
1223	Colon Cancer	20	132	528	528	1	1	1	Yes					8	0
1224	Non-Small Cell Lung Cancer (NSCLC)	25	272	2176	2176	3	3	1	Yes					25	0
1225	Carcinoma of Unknown Primary	50	182	1820	1820	1	1	1	Yes					12	0
1226	Colon Cancer	30	338	676	676	19	18	0.947368	Yes					39	0
1227	Uterine Neoplasms - Endometrial Carcinoma	30	588	1176	1176	19	16	0.842105	Yes					24	0
1228	Hepatobiliary Cancers - Gallbladder Cancer	20	154	1232	1232	19	17	0.894737	Yes					42	0
1229	Soft Tissue Sarcoma - Solitary Fibrous Tumor/Hemangiopericytoma	90	414	828	828	19	15	0.789474	Yes					35	0
1230	Uterine Neoplasms - Endometrial Carcinoma	50	216	432	432	21	2	0.0952381	Yes					29	0
1231	Colon Cancer	30	238	476	476	9	6	0.666667	Yes					37	0
1232	Kidney Cancer	90	660	1320	1320	19	14	0.736842	Yes					29	0
1233	Melanoma	85	63	504	504	2	1	0.5	Yes					9	0
1234	Colon Cancer	30	49	490	490	1	1	1	Yes					4	0
1235	Ovarian Cancer – Epithelial Ovarian Cancer/Fallopian Tube Cancer/Primary Peritoneal Cancer	80	340	680	680	1	1	1	Yes					3	0
1236	Small Cell Lung Cancer (SCLC)	50	40	480	480	1	1	1	Yes					13	0
1237	Small Cell Lung Cancer (SCLC)	80	240	480	480	1	1	1	Yes					28	0
1238	Breast Cancer - Invasive	30	460	920	920	19	18	0.947368	Yes					19	0
1239	Ovarian Cancer – Epithelial Ovarian Cancer/Fallopian Tube Cancer/Primary Peritoneal Cancer	30	588	1176	1176	19	17	0.894737	Yes					32	0
1240	Breast Cancer - Invasive	60	154	616	616	19	16	0.842105	Yes					41	0
1241	Non-Small Cell Lung Cancer (NSCLC)	20	420	840	840	19	15	0.789474	Yes					32	0
1242	Non-Small Cell Lung Cancer (NSCLC)	70	196	392	392	2	2	1	Yes					17	0
1243	Breast Cancer - Invasive	90	238	238	0	19	0	0	Yes					0	0
1244	Non-Small Cell Lung Cancer (NSCLC)	70	600	1200	1200	19	17	0.894737	Yes					37	0
1245	Non-Small Cell Lung Cancer (NSCLC)	50	117	468	468	19	17	0.894737	Yes					30	0
1246	Non-Small Cell Lung Cancer (NSCLC)	30	81	486	486	19	0	0	Yes					20	0
1247	Non-Small Cell Lung Cancer (NSCLC)	30	476	952	952	2	2	1	Yes					24	0
1248	Ovarian Cancer – Epithelial Ovarian Cancer/Fallopian Tube Cancer/Primary Peritoneal Cancer	80	345	690	690	2	2	1	Yes					27	0
1249	Non-Small Cell Lung Cancer (NSCLC)	50	396	7920	7920	1	1	1	Yes					22	0
1250	Non-Small Cell Lung Cancer (NSCLC)	80	12	84	0	7	2	0.285714	Yes					17	0
1251	Breast Cancer - Invasive	80	156	1872	1872	19	15	0.789474	Yes					32	0
1252	Breast Cancer - Invasive	30	345	690	690	19	16	0.842105	Yes					30	0
1253	Non-Small Cell Lung Cancer (NSCLC)	80	63	1008	504	21	2	0.0952381	Yes					40	0
1254	Colon Cancer	30	462	924	924	19	18	0.947368	Yes					27	0
1255	Carcinoma of Unknown Primary	20	204	816	816	19	17	0.894737	Yes					36	0
1256	Non-Melanoma Skin Cancers - Squamous Cell Skin Cancers	30	176	704	352	2	2	1	Yes					29	0
1257	Gastric Cancer	60	528	1056	1056	2	2	1	Yes					17	0
1258	Pancreatic Adenocarcinoma	50	399	798	798	19	15	0.789474	Yes					21	0
1259	Carcinoma of Unknown Primary	25	48	480	480	19	14	0.736842	Yes					40	0
1260	Colon Cancer	30	483	1932	1932	19	14	0.736842	Yes					28	0
1261	Leiomyosarcoma, uterus	80	96	576	576	2	2	1	Yes					41	0
1262	Germ Cell Tumors	95	280	560	560	1	1	1	Yes					7	0
1263	Liposarcoma	70	414	828	828	3	3	1	Yes					18	0
1264	Breast Cancer - Invasive	60	256	512	512	3	3	1	Yes					20	0
1265	Breast Cancer - Invasive	75	324	648	648	19	19	1	Yes					39	0
1266	Breast Cancer - Invasive	40	134	536	536	19	17	0.894737	Yes					38	0
1267	Non-Small Cell Lung Cancer (NSCLC)	20	360	720	720	1	1	1	Yes					10	0
1268	Non-Small Cell Lung Cancer (NSCLC)	80	338	676	676	4	4	1	Yes					16	0
1269	Colon Cancer	30	513	1026	1026	19	14	0.736842	Yes					22	0
1270	Non-Small Cell Lung Cancer (NSCLC)	20	725	1450	1450	19	16	0.842105	Yes					31	0
1271	Leiomyosarcoma, uterus	90	408	1632	1632	19	17	0.894737	Yes					32	0
1272	Non-Small Cell Lung Cancer (NSCLC)	50	44	528	528	19	16	0.842105	Yes					44	0
1273	Breast Cancer - Invasive	50	126	504	504	19	17	0.894737	Yes					34	0
1274	Breast Cancer - Invasive	40	48	432	0	21	2	0.0952381	Yes					16	0
1275	Uterine Neoplasms - Endometrial Carcinoma	80	380	760	760	19	16	0.842105	Yes					40	0
1276	Small Cell Lung Cancer (SCLC)	80	99	594	594	21	2	0.0952381	Yes					17	0
1277	Soft Tissue Sarcoma of the Extremity/Trunk	40	270	540	540	2	2	1	Yes					18	0
1278	Ovarian Cancer - Malignant Sex Cord-Stromal Tumors	90	391	782	782	3	3	1	Yes					32	0
1279	Breast Cancer - Invasive	70	160	640	640	19	18	0.947368	Yes					42	0
1280	Breast Cancer - Invasive	30	525	3150	3150	19	17	0.894737	Yes					25	0
1281	Breast Cancer - Invasive	40	667	1334	1334	19	13	0.684211	Yes					29	0
1282	Pancreatic Adenocarcinoma	10	70	560	560	1	1	1	Yes					14	0
1283	Pancreatic Adenocarcinoma	40	255	510	510	1	1	1	Yes					2	0
1284	Pancreatic Adenocarcinoma	60	350	700	700	1	1	1	Yes					14	0
1285	Carcinoma of Unknown Primary	75	140	560	560	19	17	0.894737	Yes					29	0
1286	Breast Cancer - Invasive	50	90	540	540	18	16	0.888889	Yes					40	0
1287	Melanoma	60	240	480	480	9	8	0.888889	Yes					28	0
1288	Breast Cancer - Invasive	90	108	432	432	7	6	0.857143	Yes					33	0
1289	Colon Cancer	50	368	736	736	19	18	0.947368	Yes					20	0
1290	Non-Small Cell Lung Cancer (NSCLC)	30	63	504	504	19	16	0.842105	Yes					38	0
1291	Non-Small Cell Lung Cancer (NSCLC)	80	441	441	0	19	0	0	Yes					25	0
1292	Bladder Cancer	90	513	1026	1026	19	16	0.842105	Yes					28	0
1293	Thymomas and Thymic Carcinomas	80	425	850	850	19	17	0.894737	Yes					31	0
1294	Breast Cancer - Invasive	70	208	416	416	19	17	0.894737	Yes					27	0
1295	Rectal Cancer	30	621	1242	1242	19	15	0.789474	Yes					37	0
1296	Breast Cancer - Invasive	30	99	594	594	19	14	0.736842	Yes					26	0
1297	Carcinoma of Unknown Primary	90	300	3000	3000	8	7	0.875	Yes					30	0
1298	Breast Cancer - Invasive	60	736	1472	1472	19	17	0.894737	Yes					26	0
1299	Non-Small Cell Lung Cancer (NSCLC)	40	63	504	504	1	1	1	Yes					2	0
1300	Uterine Neoplasms - Endometrial Carcinoma	50	54	540	540	2	2	1	Yes					21	0
1301	Ovarian Cancer – Epithelial Ovarian Cancer/Fallopian Tube Cancer/Primary Peritoneal Cancer	40	506	1012	1012	2	2	1	Yes					30	0
1302	Non-Small Cell Lung Cancer (NSCLC)	75	690	1380	1380	19	17	0.894737	Yes					50	0
1303	Breast Cancer - Invasive	60	360	720	720	19	17	0.894737	Yes					41	0
1304	Ovarian Cancer – Epithelial Ovarian Cancer/Fallopian Tube Cancer/Primary Peritoneal Cancer	50	221	442	442	19	17	0.894737	Yes					43	0
1305	Breast Cancer - Invasive	60	304	608	608	19	15	0.789474	Yes					34	0
1306	Breast Cancer - Invasive	70	165	660	660	19	17	0.894737	Yes					42	0
1307	Breast Cancer - Invasive	80	112	448	448	17	14	0.823529	Yes					33	0
1308	Lung Neuroendocrine Tumors	50	66	528	528	21	2	0.0952381	Yes					30	0
1309	Non-Small Cell Lung Cancer (NSCLC)	60	480	960	960	19	19	1	Yes					49	0
1310	Ovarian Cancer – Epithelial Ovarian Cancer/Fallopian Tube Cancer/Primary Peritoneal Cancer	40	260	520	520	1	1	1	Yes					14	0
1311	Pancreatic Adenocarcinoma	25	45	540	540	17	15	0.882353	Yes					40	0
1312	Ovarian Cancer – Epithelial Ovarian Cancer/Fallopian Tube Cancer/Primary Peritoneal Cancer	50	420	840	840	17	16	0.941176	Yes					54	0
1313	Breast Cancer - Invasive	40	400	800	800	17	16	0.941176	Yes					31	0
1314	Non-Small Cell Lung Cancer (NSCLC)	70	352	704	704	17	14	0.823529	Yes					10	0
1315	Pancreatic Adenocarcinoma	25	272	544	544	4	4	1	Yes					36	0
1316	Breast Cancer - Invasive	30	414	828	828	1	1	1	Yes					16	0
1317	Breast Cancer - Invasive	40	121	484	484	3	2	0.666667	Yes					25	0
1318	Non-Small Cell Lung Cancer (NSCLC)	70	4	0	172	3	3	1	Yes					13	0
1319	Kidney Cancer	70	456	912	912	17	15	0.882353	Yes					26	0
1320	Bladder Cancer	15	110	440	440	7	0	0	Yes					35	0
1321	Non-Melanoma Skin Cancers - Basal Cell Skin Cancers	15	192	384	384	17	15	0.882353	Yes					51	0
1322	Carcinoma of Unknown Primary	40	240	480	480	17	16	0.941176	Yes					56	0
1323	Ovarian Cancer – Epithelial Ovarian Cancer/Fallopian Tube Cancer/Primary Peritoneal Cancer	30	572	1144	1144	17	17	1	Yes					37	0
1324	Breast Cancer - Invasive	50	494	988	988	17	14	0.823529	Yes					21	0
1325	Ovarian Cancer – Epithelial Ovarian Cancer/Fallopian Tube Cancer/Primary Peritoneal Cancer	90	40	800	800	17	0	0	Yes					23	0
1326	Non-Small Cell Lung Cancer (NSCLC)	30	192	1152	1152	6	4	0.666667	Yes					10	0
1327	Vulva	15	90	540	540	17	15	0.882353	Yes					17	0
1328	Non-Small Cell Lung Cancer (NSCLC)	60	336	672	672	17	15	0.882353	Yes					39	0
1329	Non-Small Cell Lung Cancer (NSCLC)	60	76	456	456	17	13	0.764706	Yes					18	0
1330	Non-Small Cell Lung Cancer (NSCLC)	80	540	1080	1080	17	16	0.941176	Yes					28	0
1331	Breast Cancer - Invasive	40	252	1008	1008	17	14	0.823529	Yes					27	0
1332	Breast Cancer - Invasive	50	72	432	432	8	8	1	Yes					27	0
1333	Breast Cancer - Invasive	70	117	468	468	1	1	1	Yes					8	0
1334	Breast Cancer - Invasive	80	225	450	450	2	2	1	Yes					23	0
1335	Non-Small Cell Lung Cancer (NSCLC)	80	195	390	390	0	0		Yes					28	0
1336	Ovarian Cancer – Epithelial Ovarian Cancer/Fallopian Tube Cancer/Primary Peritoneal Cancer	70	180	360	360	0	0		Yes					23	0
1337	Breast Cancer - Invasive	40	288	576	576	17	15	0.882353	Yes					41	0
1338	Kidney Cancer	60	220	440	440	17	16	0.941176	Yes					41	0
1339	Breast Cancer - Invasive	50	121	484	484	17	15	0.882353	Yes					43	0
1340	Non-Small Cell Lung Cancer (NSCLC)	10	60	480	480	17	15	0.882353	Yes					34	0
1341	Non-Small Cell Lung Cancer (NSCLC)	60	286	572	0	19	3	0.157895	Yes					20	0
1342	Non-Small Cell Lung Cancer (NSCLC)	30	483	966	966	17	12	0.705882	Yes					26	0
1343	Ovarian Cancer – Epithelial Ovarian Cancer/Fallopian Tube Cancer/Primary Peritoneal Cancer	30	130	520	520	17	15	0.882353	Yes					44	0
1344	Melanoma	40	80	480	480	17	15	0.882353	Yes					20	0
1345	Breast Cancer - Invasive	60	288	576	576	17	14	0.823529	Yes					30	0
1346	Breast Cancer - Invasive	25	2	150	0	19	2	0.105263	Yes					18	0
1347	Breast Cancer - Invasive	50	50	500	500	3	3	1	Yes					37	0
1348	Non-Small Cell Lung Cancer (NSCLC)	10	78	468	468	1	1	1	Yes					29	0
1349	Hepatobiliary Cancers - Extrahepatic Cholangiocarcinoma	30	384	768	768	2	2	1	Yes					11	0
1350	Non-Small Cell Lung Cancer (NSCLC)	60	88	528	528	1	1	1	Yes					12	0
1351	Colon Cancer	30	90	540	540	21	19	0.904762	Yes					39	0
1352	Small Cell Lung Cancer (SCLC)	80	198	396	396	17	16	0.941176	Yes					46	0
1353	Melanoma	70	247	494	494	17	14	0.823529	Yes					40	0
1354	Pancreatic Adenocarcinoma	40	144	576	288	2	2	1	Yes					2	0
1355	Non-Small Cell Lung Cancer (NSCLC)	90	60	480	480	17	14	0.823529	Yes					16	0
1356	Non-Small Cell Lung Cancer (NSCLC)	25	42	504	504	6	4	0.666667	Yes					24	0
1357	Non-Small Cell Lung Cancer (NSCLC)	40	713	1426	1426	17	15	0.882353	Yes					28	0
1358	Breast Cancer - Invasive	70	600	1200	1200	21	17	0.809524	Yes					40	0
1359	Prostate Cancer	70	361	722	722	17	13	0.764706	Yes					32	0
1360	Breast Cancer - Invasive	30	64	512	512	17	14	0.823529	Yes					31	0
1361	Ovarian Cancer – Epithelial Ovarian Cancer/Fallopian Tube Cancer/Primary Peritoneal Cancer	80	48	480	480	4	3	0.75	Yes					34	0
1362	Hemangiopericytoma	70	144	576	576	2	1	0.5	Yes					29	0
1363	Hepatobiliary Cancers - Hepatocellular Carcinoma	5	20	520	520	0	0		Yes					22	0
1364	Non-Small Cell Lung Cancer (NSCLC)	50	119	476	476	0	0		Yes					26	0
1365	Breast Cancer - Invasive	60	204	408	408	21	17	0.809524	Yes					48	0
1366	Small Cell Lung Cancer (SCLC)	70	63	504	504	2	1	0.5	Yes					12	0
1367	Vulva	60	368	736	736	17	14	0.823529	Yes					35	0
1368	Gastric Cancer	40	748	1496	1496	0	0		Yes					13	0
1369	Rectal Cancer	40	209	418	418	1	1	1	Yes					1	0
1370	Breast Cancer - Invasive	50	126	504	504	1	1	1	Yes					2	0
1371	Breast Cancer - Invasive	30	273	546	546	21	18	0.857143	Yes					51	0
1372	Bladder Cancer	50	504	1008	1008	17	14	0.823529	Yes					45	0
1373	Colon Cancer	25	36	504	504	17	15	0.882353	Yes					28	0
1374	Breast Cancer - Invasive	90	435	870	870	1	1	1	Yes					12	0
1375	Hepatobiliary Cancers - Intrahepatic Cholangiocarcinoma	40	609	1218	1218	1	1	1	Yes					9	0
1376	Colon Cancer	30	71	568	568	17	17	1	Yes					47	0
1377	Non-Small Cell Lung Cancer (NSCLC)	60	462	924	924	2	2	1	Yes					19	0
1378	Hepatobiliary Cancers - Hepatocellular Carcinoma	70	442	1768	1768	21	17	0.809524	Yes					25	0
1379	Non-Small Cell Lung Cancer (NSCLC)	20	400	800	800	21	17	0.809524	Yes					31	0
1380	Breast Cancer - Invasive	60	30	480	450	11	10	0.909091	Yes					32	0
1381	Ovarian Cancer – Epithelial Ovarian Cancer/Fallopian Tube Cancer/Primary Peritoneal Cancer	80	108	432	432	17	13	0.764706	Yes					14	0
1382	Hepatobiliary Cancers - Hepatocellular Carcinoma	40	308	616	616	21	18	0.857143	Yes					28	0
1383	Ovarian Cancer – Epithelial Ovarian Cancer/Fallopian Tube Cancer/Primary Peritoneal Cancer	80	110	440	440	17	16	0.941176	Yes					42	0
1384	Mesothelioma Pleura	70	336	672	672	17	16	0.941176	Yes					34	0
1385	Non-Melanoma Skin Cancers - Merkel Cell Carcinoma	90	154	616	616	17	17	1	Yes					29	0
1386	Breast Cancer - Invasive	70	104	832	832	19	2	0.105263	Yes					18	0
1387	Breast Cancer - Invasive	30	644	1288	1288	17	15	0.882353	Yes					28	0
1388	Head and Neck Cancers - Cancer of the Oropharynx	80	450	1800	1800	21	17	0.809524	Yes					23	0
1389	Soft Tissue Sarcoma of the Extremity/Trunk	90	391	782	782	21	17	0.809524	Yes					19	0
1390	Breast Cancer - Invasive	20	252	504	504	2	1	0.5	Yes					15	0
1391	Non-Small Cell Lung Cancer (NSCLC)	70	156	1248	1872	2	2	1	Yes					7	0
1392	Non-Small Cell Lung Cancer (NSCLC)	25	570	1140	1140	17	15	0.882353	Yes					17	0
1393	Non-Small Cell Lung Cancer (NSCLC)	90	270	540	540	17	14	0.823529	Yes					47	0
1394	Colon Cancer	50	621	1242	1242	17	15	0.882353	Yes					44	0
1395	Uterine Neoplasms - Endometrial Carcinoma	30	325	650	650	17	13	0.764706	Yes					22	0
1396	Non-Small Cell Lung Cancer (NSCLC)	50	420	840	840	1	1	1	Yes					7	0
1397	Breast Cancer - Invasive	80	460	4600	4600	17	0	0	Yes					27	0
1398	Breast Cancer - Invasive	60	56	448	448	17	14	0.823529	Yes					35	0
1399	Ovarian Cancer – Epithelial Ovarian Cancer/Fallopian Tube Cancer/Primary Peritoneal Cancer	80	78	468	468	0	0		Yes					29	0
1400	Neuroendocrine Tumors - Poorly Differentiated (High-Grade)/Large or Small Cell	70	30	240	0	2	2	1	Yes					18	0
1401	Carcinoma of Unknown Primary	30	644	1288	1288	17	15	0.882353	Yes					34	0
1402	Breast Cancer - Invasive	60	374	748	748	17	15	0.882353	Yes					19	0
1403	Bladder Cancer	80	198	396	396	17	16	0.941176	Yes					33	0
1404	Breast Cancer - Invasive	60	352	704	704	21	20	0.952381	Yes					27	0
1405	Breast Cancer - Invasive	70	432	864	864	21	20	0.952381	Yes					33	0
1406	Breast Cancer - Invasive	40	550	1100	1100	17	13	0.764706	Yes					28	0
1407	Uterine Neoplasms - Endometrial Carcinoma	70	323	646	646	17	16	0.941176	Yes					33	0
1408	Breast Cancer - Invasive	80	35	490	245	21	0	0	Yes					21	0
1409	Ovarian Cancer – Epithelial Ovarian Cancer/Fallopian Tube Cancer/Primary Peritoneal Cancer	50	624	1248	1248	17	17	1	Yes					41	0
1410	Breast Cancer - Invasive	80	84	1260	0	21	2	0.0952381	Yes					18	0
1411	Breast Cancer - Invasive	70	143	572	572	1	1	1	Yes					29	0
1412	Breast Cancer - Invasive	70	147	588	588	21	18	0.857143	Yes					29	0
1413	Breast Cancer - Noninvasive	25	620	1240	1240	21	19	0.904762	Yes					22	0
1414	Cervical Cancer	50	130	520	520	17	14	0.823529	Yes					22	0
1415	Esophageal and Esophagogastric Junction Cancers	10	324	648	648	1	1	1	Yes					8	0
1416	Non-Small Cell Lung Cancer (NSCLC)	60	342	684	684	2	2	1	Yes					25	0
1417	Non-Small Cell Lung Cancer (NSCLC)	80	80	480	480	5	5	1	Yes					34	0
1418	Non-Small Cell Lung Cancer (NSCLC)	60	414	828	828	17	15	0.882353	Yes					34	0
1419	Breast Cancer - Invasive	70	500	1000	1000	17	14	0.823529	Yes					48	0
1420	Urachal Carcinoma	30	560	1120	1120	0	0		Yes					0	0
1421	Non-Small Cell Lung Cancer (NSCLC)	30	378	756	756	21	17	0.809524	Yes					29	0
1422	Non-Small Cell Lung Cancer (NSCLC)	60	54	540	540	21	0	0	Yes					15	0
1423	Synovial Sarcoma	90	100	600	600	21	19	0.904762	Yes					39	0
1424	Non-Melanoma Skin Cancers - Basal Cell Skin Cancers	25	70	560	560	0	0		Yes					27	0
1425	Pancreatic Adenocarcinoma	20	484	484	0	2	2	1	No					0	0
1426	Non-Small Cell Lung Cancer (NSCLC)	70	80	480	480	21	0	0	Yes					22	0
1427	Hepatobiliary Cancers - Intrahepatic Cholangiocarcinoma	80	440	880	880	1	1	1	Yes					3	0
1428	Esophageal and Esophagogastric Junction Cancers	25	54	540	540	7	6	0.857143	Yes					24	0
1429	Breast Cancer - Invasive	60	500	1000	1000	17	16	0.941176	Yes					42	0
1430	Breast Cancer - Invasive	70	627	1254	1254	2	1	0.5	Yes					10	0
1431	Gastric Cancer	10	154	616	616	17	9	0.529412	Yes					18	0
1432	Carcinoma of Unknown Primary	50	44	528	528	1	0	0	Yes					18	0
1433	Non-Small Cell Lung Cancer (NSCLC)	60	450	900	900	0	0		Yes					28	0
1434	Non-Small Cell Lung Cancer (NSCLC)	70	70	560	560	21	17	0.809524	Yes					19	0
1435	Soft Tissue Sarcoma - Retroperitoneal/ Intra-abdominal	95	55	550	550	17	15	0.882353	Yes					16	0
1436	Non-Small Cell Lung Cancer (NSCLC)	80	600	1200	1200	17	13	0.764706	Yes					22	0
1437	Esophageal and Esophagogastric Junction Cancers	25	400	800	800	17	16	0.941176	Yes					59	0
1438	Breast Cancer - Invasive	50	96	576	576	21	0	0	Yes					6	0
1439	Non-Small Cell Lung Cancer (NSCLC)	70	132	528	528	17	11	0.647059	Yes					39	0
1440	Small Cell Lung Cancer (SCLC)	90	441	882	882	5	5	1	Yes					35	0
1441	Breast Cancer - Invasive	60	312	624	624	21	18	0.857143	Yes					26	0
1442	Non-Small Cell Lung Cancer (NSCLC)	80	572	1144	1144	21	15	0.714286	Yes					22	0
1443	Breast Cancer - Invasive	20	160	640	640	21	19	0.904762	Yes					49	0
1444	Breast Cancer - Invasive	60	78	468	468	21	20	0.952381	Yes					37	0
1445	Pancreatic Adenocarcinoma	70	38	532	532	17	15	0.882353	Yes					42	0
1446	Neuroendocrine Tumors - Poorly Differentiated (High-Grade)/Large or Small Cell	70	120	480	480	17	14	0.823529	Yes					54	0
1447	Breast Cancer - Invasive	70	182	364	364	17	15	0.882353	Yes					25	0
1448	Breast Cancer - Invasive	25	238	476	476	2	2	1	Yes					30	0
1449	Ovarian Cancer – Epithelial Ovarian Cancer/Fallopian Tube Cancer/Primary Peritoneal Cancer	40	9	162	0	4	4	1	Yes					19	0
1450	Thyroid Carcinoma - Papillary Carcinoma	50	480	960	960	21	20	0.952381	Yes					45	0
1451	Non-Small Cell Lung Cancer (NSCLC)	50	112	448	448	21	19	0.904762	Yes					40	0
1452	Gastric Cancer	25	532	1064	1064	3	2	0.666667	Yes					17	0
1453	Lung Neuroendocrine Tumors	70	48	288	480	22	19	0.863636	Yes					26	0
1454	Breast Cancer - Invasive	40	300	600	600	21	19	0.904762	Yes					58	0
1455	Colon Cancer	40	408	816	816	21	19	0.904762	Yes					38	0
1456	Breast Cancer - Invasive	80	63	504	504	17	12	0.705882	Yes					31	0
1457	Small Cell Lung Cancer (SCLC)	90	396	792	792	21	19	0.904762	Yes					31	0
1458	Melanoma	70	224	448	448	23	21	0.913043	Yes					43	0
1459	Small Cell Lung Cancer (SCLC)	60	220	440	440	5	5	1	Yes					4	0
1460	Neuroendocrine Tumors - Poorly Differentiated (High-Grade)/Large or Small Cell	70	80	480	480	1	1	1	Yes					9	0
1461	Uterine Neoplasms - Endometrial Carcinoma	50	104	416	416	2	2	1	Yes					32	0
1462	Breast Cancer - Invasive	70	520	1040	1040	2	2	1	Yes					22	0
1463	Appendix	5	192	384	384	8	7	0.875	Yes					36	0
1464	Ovarian Cancer – Epithelial Ovarian Cancer/Fallopian Tube Cancer/Primary Peritoneal Cancer	30	28	504	392	21	0	0	Yes					8	0
1465	Bladder Cancer	60	525	1050	1050	21	21	1	Yes					31	0
1466	Colon Cancer	40	64	512	512	21	20	0.952381	Yes					22	0
1467	Non-Small Cell Lung Cancer (NSCLC)	50	500	1000	1000	21	19	0.904762	Yes					35	0
1468	Hepatobiliary Cancers - Intrahepatic Cholangiocarcinoma	60	600	1200	1200	17	14	0.823529	Yes					29	0
1469	Non-Small Cell Lung Cancer (NSCLC)	50	180	360	360	21	20	0.952381	Yes					44	0
1470	Gastric Cancer	60	240	960	960	1	1	1	Yes					29	0
1471	Breast Cancer - Invasive	80	350	700	700	21	17	0.809524	Yes					25	0
1472	Breast Cancer - Invasive	40	828	1656	1656	21	19	0.904762	Yes					18	0
1473	Breast Cancer - Invasive	60	390	780	780	21	19	0.904762	Yes					30	0
1474	Pancreatic Adenocarcinoma	20	110	440	440	4	4	1	Yes					31	0
1475	Neuroendocrine Tumors - Poorly Differentiated (High-Grade)/Large or Small Cell	40	200	400	400	17	16	0.941176	Yes					16	0
1476	Prostate Cancer	40	540	1080	1080	3	3	1	Yes					28	0
1477	Breast Cancer - Invasive	75	64	512	512	21	18	0.857143	Yes					15	0
1478	Leiomyosarcoma, NOS	90	270	540	540	17	15	0.882353	Yes					29	0
1479	Ovarian Cancer – Epithelial Ovarian Cancer/Fallopian Tube Cancer/Primary Peritoneal Cancer	60	300	600	600	17	15	0.882353	Yes					39	0
1480	Carcinoma of Unknown Primary	80	315	630	630	17	16	0.941176	Yes					41	0
1481	Kidney Cancer	90	143	572	572	17	14	0.823529	Yes					20	0
1482	Prostate Cancer	40	224	448	448	17	12	0.705882	Yes					16	0
1483	Liposarcoma	90	160	640	640	21	20	0.952381	Yes					26	0
1484	Breast Cancer - Invasive	60	204	408	408	17	16	0.941176	Yes					32	0
1485	Carcinoma of Unknown Primary	90	580	1160	1160	17	12	0.705882	Yes					19	0
1486	Colon Cancer	60	640	1280	1280	1	1	1	Yes					15	0
1487	Esophageal and Esophagogastric Junction Cancers	20	378	756	756	1	1	1	Yes					33	0
1488	Breast Cancer - Invasive	90	374	748	748	1	1	1	Yes					24	0
1489	Breast Cancer - Invasive	70	170	340	340	21	18	0.857143	Yes					23	0
1490	Breast Cancer - Invasive	80	36	504	0	5	5	1	Yes					25	0
1491	Esophageal and Esophagogastric Junction Cancers	50	225	450	450	17	16	0.941176	Yes					34	0
1492	Breast Cancer - Invasive	70	600	1200	1200	21	19	0.904762	Yes					46	0
1493	Colon Cancer	30	713	1426	1426	21	20	0.952381	Yes					42	0
1494	Colon Cancer	30	598	1196	1196	17	14	0.823529	Yes					13	0
1495	Non-Small Cell Lung Cancer (NSCLC)	50	660	1320	1320	2	2	1	Yes					19	0
1496	Breast Cancer - Invasive	70	425	850	850	3	3	1	Yes					21	0
1497	Breast Cancer - Invasive	70	27	486	486	7	6	0.857143	Yes					24	0
1498	Uterine Neoplasms - Endometrial Carcinoma	60	133	532	532	17	13	0.764706	Yes					24	0
1499	Kidney Cancer	40	60	480	480	8	7	0.875	Yes					26	0
1500	Hepatobiliary Cancers - Hepatocellular Carcinoma	40	567	1134	1134	21	18	0.857143	Yes					42	0
1501	Non-Small Cell Lung Cancer (NSCLC)	30	360	720	720	21	18	0.857143	Yes					35	0
1502	Breast Cancer - Invasive	80	300	600	600	24	21	0.875	Yes					38	0
1503	Hepatobiliary Cancers - Intrahepatic Cholangiocarcinoma	30	368	736	736	17	14	0.823529	Yes					30	0
1504	Adenoid cystic carcinoma	80	468	936	936	1	1	1	Yes					20	0
1505	Breast Cancer - Invasive	80	140	560	560	6	6	1	Yes					8	0
1506	Breast Cancer - Invasive	50	289	578	578	1	1	1	Yes					19	0
1507	Breast Cancer - Invasive	70	120	480	480	21	19	0.904762	Yes					24	0
1508	Ovarian Cancer – Epithelial Ovarian Cancer/Fallopian Tube Cancer/Primary Peritoneal Cancer	60	468	936	936	23	22	0.956522	Yes					40	0
1509	Pancreatic Adenocarcinoma	20	600	1200	1200	21	18	0.857143	Yes					33	0
1510	Salivary duct carcinoma	80	126	504	504	21	0	0	Yes					2	0
1511	Breast Cancer - Invasive	1	391	782	782	17	0	0	Yes					0	0
1512	Non-Small Cell Lung Cancer (NSCLC)	80	437	874	874	21	21	1	Yes					43	0
1513	Uterine Neoplasms - Uterine Sarcoma	70	300	600	600	21	20	0.952381	Yes					38	0
1514	Breast Cancer - Invasive	90	476	952	952	21	19	0.904762	Yes					39	0
1515	Colon Cancer	60	504	1008	1008	17	14	0.823529	Yes					39	0
1516	Ovarian Cancer – Epithelial Ovarian Cancer/Fallopian Tube Cancer/Primary Peritoneal Cancer	50	735	1470	1470	17	15	0.882353	Yes					22	0
1517	Breast Cancer - Invasive	80	242	484	484	21	18	0.857143	Yes					32	0
1518	Soft Tissue Sarcoma of the Extremity/Trunk	70	8	496	496	21	19	0.904762	Yes					33	0
1519	Breast Cancer - Invasive	30	625	1250	1250	10	9	0.9	Yes					37	0
1520	Breast Cancer - Invasive	80	598	1196	1196	1	1	1	Yes					13	0
1521	Non-Small Cell Lung Cancer (NSCLC)	40	252	504	504	21	19	0.904762	Yes					36	0
1522	Colon Cancer	80	144	1152	576	1	0	0	Yes					31	0
1523	Urachal Carcinoma	50	256	512	512	21	16	0.761905	Yes					22	0
1524	Non-Small Cell Lung Cancer (NSCLC)	20	294	588	588	17	15	0.882353	Yes					47	0
1525	Breast Cancer - Invasive	50	378	756	756	21	18	0.857143	Yes					12	0
1526	Rectal Cancer	80	195	390	390	17	15	0.882353	Yes					33	0
1527	Breast Cancer - Invasive	70	667	1334	1334	21	18	0.857143	Yes					38	0
1528	Ovarian Cancer – Epithelial Ovarian Cancer/Fallopian Tube Cancer/Primary Peritoneal Cancer	70	63	504	504	19	16	0.842105	Yes					28	0
1529	Prostate Cancer	40	242	484	484	6	5	0.833333	Yes					30	0
1530	Rectal Cancer	70	315	630	630	7	7	1	Yes					13	0
1531	Melanoma	30	78	468	468	11	11	1	Yes					27	0
1532	Melanoma	80	165	660	660	8	7	0.875	Yes					24	0
1533	Neuroendocrine Tumors - Adrenal Gland Tumors	90	252	5040	5040	4	2	0.5	Yes					38	0
1534	Pancreatic Adenocarcinoma	20	240	480	480	13	13	1	Yes					31	0
1535	Prostate Cancer	90	42	504	504	21	17	0.809524	Yes					19	0
1536	Non-Small Cell Lung Cancer (NSCLC)	40	152	608	608	6	6	1	Yes					8	0
1537	Acinic cell carcinoma	40	320	640	640	17	13	0.764706	Yes					40	0
1538	Breast Cancer - Invasive	70	529	1058	1058	24	24	1	Yes					40	0
1539	Non-Small Cell Lung Cancer (NSCLC)	40	182	364	364	9	9	1	Yes					27	0
1540	Breast Cancer - Invasive	70	345	690	690	21	17	0.809524	Yes					6	0
1541	Adenoid cystic carcinoma	80	336	672	672	21	19	0.904762	Yes					26	0
1542	Breast Cancer - Invasive	80	225	450	450	5	5	1	Yes					24	0
1543	Breast Cancer - Invasive	50	144	576	576	7	7	1	Yes					23	0
1544	Breast Cancer - Invasive	70	350	700	700	21	18	0.857143	Yes					23	0
1545	Breast Cancer - Invasive	20	493	986	986	17	15	0.882353	Yes					30	0
1546	Non-Small Cell Lung Cancer (NSCLC)	40	88	528	528	24	3	0.125	Yes					27	0
1547	Small Cell Lung Cancer (SCLC)	70	192	384	384	11	9	0.818182	Yes					27	0
1548	Ovarian Cancer – Epithelial Ovarian Cancer/Fallopian Tube Cancer/Primary Peritoneal Cancer	60	437	874	874	17	16	0.941176	Yes					18	0
1549	Breast Cancer - Invasive	90	169	338	338	21	14	0.666667	Yes					43	0
1550	Colon Cancer	10	480	960	960	17	15	0.882353	Yes					41	0
1551	Appendix	35	575	1150	1150	17	15	0.882353	Yes					43	0
1552	Colon Cancer	70	550	1100	1100	17	15	0.882353	Yes					28	0
1553	Non-Small Cell Lung Cancer (NSCLC)	30	64	512	512	13	12	0.923077	Yes					35	0
1554	Small intestine cancer	50	90	540	540	11	10	0.909091	Yes					22	0
1555	Thymomas and Thymic Carcinomas	40	390	780	780	24	21	0.875	Yes					19	0
1556	Uterine Neoplasms - Endometrial Carcinoma	30	420	840	840	24	23	0.958333	Yes					59	0
1557	Breast Cancer - Invasive	60	14	0	588	5	0	0	Yes					8	0
1558	Hemangioblastoma	90	132	528	528	17	15	0.882353	Yes					25	0
1559	Breast Cancer - Invasive	40	210	420	420	5	5	1	Yes					26	0
1560	Cervical Cancer	30	260	520	520	24	23	0.958333	Yes					26	0
1561	Ovarian Cancer – Epithelial Ovarian Cancer/Fallopian Tube Cancer/Primary Peritoneal Cancer	80	176	352	352	5	5	1	Yes					10	0
1562	Colon Cancer	60	168	336	336	6	6	1	Yes					14	0
1563	Non-Small Cell Lung Cancer (NSCLC)	40	460	920	920	5	5	1	Yes					20	0
1564	Non-Small Cell Lung Cancer (NSCLC)	70	308	616	616	17	16	0.941176	Yes					48	0
1565	Pancreatic Adenocarcinoma	25	240	480	480	21	19	0.904762	Yes					17	0
1566	Breast Cancer - Invasive	30	520	1040	1040	24	22	0.916667	Yes					21	0
1567	Non-Small Cell Lung Cancer (NSCLC)	40	220	440	440	22	20	0.909091	Yes					21	0
1568	Non-Small Cell Lung Cancer (NSCLC)	60	448	896	896	21	15	0.714286	Yes					40	0
1569	Breast Cancer - Invasive	60	324	648	648	21	17	0.809524	Yes					25	0
1570	Central Nervous System Cancers - Glioblastoma	50	336	672	672	19	16	0.842105	Yes					32	0
1571	Head and Neck Cancers - Cancer of the Oropharynx	30	420	840	840	24	21	0.875	Yes					36	0
1572	Breast Cancer - Invasive	70	575	1150	1150	24	22	0.916667	Yes					29	0
1573	Neuroendocrine Tumors - Pheochromocytoma/Paraganglioma	80	600	1200	1200	24	23	0.958333	Yes					32	0
1574	Lung Neuroendocrine Tumors	30	48	240	0	2	2	1	Yes					16	0
1575	Prostate Cancer	60	418	836	836	2	2	1	Yes					30	0
1576	Breast Cancer - Invasive	40	256	512	512	17	14	0.823529	Yes					32	0
1577	Breast Cancer - Invasive	60	360	720	720	17	16	0.941176	Yes					16	0
1578	Non-Small Cell Lung Cancer (NSCLC)	80	56	448	448	24	24	1	Yes					19	0
1579	Non-Small Cell Lung Cancer (NSCLC)	70	352	704	704	21	7	0.333333	Yes					42	0
1580	Colon Cancer	80	648	1296	1296	17	16	0.941176	Yes					17	0
1581	Neuroendocrine Tumors - Poorly Differentiated (High-Grade)/Large or Small Cell	90	180	360	360	24	5	0.208333	Yes					8	0
1582	Breast Cancer - Invasive	40	828	1656	1656	24	21	0.875	Yes					19	0
1583	Breast Cancer - Invasive	70	224	448	448	24	21	0.875	Yes					48	0
1584	Breast Cancer - Invasive	40	651	1302	1302	21	18	0.857143	Yes					34	0
1585	Breast Cancer - Invasive	45	204	408	408	6	5	0.833333	Yes					28	0
1586	Breast Cancer - Invasive	40	150	600	600	23	21	0.913043	Yes					28	0
1587	Breast Cancer - Invasive	70	462	1848	1848	17	14	0.823529	Yes					30	0
1588	Breast Cancer - Invasive	5	270	540	540	24	0	0	Yes					21	0
1589	Breast Cancer - Invasive	20	324	648	648	17	15	0.882353	Yes					43	0
1590	Breast Cancer - Invasive	80	374	748	748	17	14	0.823529	Yes					35	0
1591	Breast Cancer - Invasive	20	374	748	748	17	15	0.882353	Yes					41	0
1592	Breast Cancer - Invasive	60	276	552	552	17	14	0.823529	Yes					33	0
1593	Breast Cancer - Invasive	60	252	504	504	17	14	0.823529	Yes					43	0
1594	Breast Cancer - Invasive	70	285	570	570	17	15	0.882353	Yes					24	0
1595	Anal Carcinoma	80	132	528	528	17	0	0	Yes					10	0
1596	Soft Tissue Sarcoma - Alveolar Soft Part Sarcoma (ASPS)	10	322	644	644	17	15	0.882353	Yes					24	0
1597	Pancreatic Adenocarcinoma	80	378	756	756	17	14	0.823529	Yes					43	0
1598	Colon Cancer	40	476	952	952	17	17	1	Yes					48	0
1599	Non-Small Cell Lung Cancer (NSCLC)	30	156	624	624	24	23	0.958333	Yes					49	0
1600	Non-Small Cell Lung Cancer (NSCLC)	25	180	360	360	24	23	0.958333	Yes					24	0
1601	Gastric Cancer	90	294	588	588	24	23	0.958333	Yes					35	0
1602	Breast Cancer - Invasive	90	25	500	500	24	2	0.0833333	Yes					0	0
1603	Uterine Neoplasms - Uterine Sarcoma	70	162	648	648	3	3	1	Yes					9	0
1604	Cervical Cancer	20	441	882	882	17	14	0.823529	Yes					27	0
1605	Breast Cancer - Invasive	35	110	440	440	6	6	1	Yes					20	0
1606	Colon Cancer	30	56	448	448	23	2	0.0869565	Yes					26	0
1607	Cervical Cancer	15	15	510	0	24	11	0.458333	Yes					27	0
1608	Breast Cancer - Invasive	60	70	560	560	24	23	0.958333	Yes					18	0
1609	Carcinoma of Unknown Primary	5	288	576	576	17	14	0.823529	Yes					35	0
1610	Prostate Cancer	75	224	448	448	24	22	0.916667	Yes					33	0
1611	Mesothelioma Pleura	80	180	360	360	17	14	0.823529	Yes					17	0
1612	Uterine Neoplasms - Endometrial Carcinoma	85	350	700	700	17	6	0.352941	Yes					42	0
1613	Pancreatic Adenocarcinoma	35	620	1240	1240	24	21	0.875	Yes					29	0
1614	Bladder Cancer	30	180	360	360	21	16	0.761905	Yes					19	0
1615	Esophageal and Esophagogastric Junction Cancers	80	221	442	442	24	22	0.916667	Yes					34	0
1616	Soft Tissue Sarcoma - Gastrointestinal Stromal Tumors (GIST)	80	98	588	588	24	9	0.375	Yes					25	0
1617	Breast Cancer - Invasive	30	192	384	384	21	2	0.0952381	Yes					10	0
1618	Breast Cancer - Invasive	70	56	448	448	24	22	0.916667	Yes					15	0
1619	Breast Cancer - Invasive	50	726	1452	1452	24	21	0.875	Yes					14	0
1620	Ovarian Cancer – Epithelial Ovarian Cancer/Fallopian Tube Cancer/Primary Peritoneal Cancer	20	255	510	510	21	19	0.904762	Yes					26	0
1621	Colon Cancer	20	80	480	480	21	13	0.619048	Yes					16	0
1622	Osteosarcoma	60	91	546	546	7	7	1	Yes					19	0
1623	Osteosarcoma	80	90	540	540	21	20	0.952381	Yes					10	0
1624	Melanoma	90	462	924	924	17	15	0.882353	Yes					39	0
1625	Non-Small Cell Lung Cancer (NSCLC)	20	315	630	630	24	24	1	Yes					40	1
1626	Melanoma	20	112	448	448	21	20	0.952381	Yes					31	0
1627	Breast Cancer - Invasive	70	690	1380	1380	24	22	0.916667	Yes					19	0
1628	Pancreatic Adenocarcinoma	60	450	900	900	24	20	0.833333	Yes					29	0
1629	Carcinoma of Unknown Primary	30	660	1320	1320	0	0		No					0	0
1630	Non-Small Cell Lung Cancer (NSCLC)	20	121	484	484	3	3	1	Yes					9	0
1631	Soft Tissue Sarcoma - Inflammatory Myofibroblastic Tumor (IMT) with ALK Translocation	90	255	510	510	24	23	0.958333	Yes					35	0
1632	Gastric Cancer	10	440	880	880	2	2	1	Yes					21	0
1633	Melanoma	70	108	432	432	24	0	0	Yes					19	0
1634	Pancreatic Adenocarcinoma	30	255	510	510	24	23	0.958333	Yes					47	0
1635	Colon Cancer	40	70	560	560	17	16	0.941176	Yes					27	0
1636	Breast Cancer - Invasive	30	36	2520	0	24	0	0	Yes					18	0
1637	Head and Neck Cancers - Cancer of the Nasopharynx	20	63	504	504	24	23	0.958333	Yes					31	0
1638	Non-Small Cell Lung Cancer (NSCLC)	30	620	1240	1240	0	0		Yes					12	0
1639	Non-Small Cell Lung Cancer (NSCLC)	30	190	380	380	24	20	0.833333	Yes					10	2
1640	Ovarian Cancer – Epithelial Ovarian Cancer/Fallopian Tube Cancer/Primary Peritoneal Cancer	70	624	1248	1248	24	23	0.958333	Yes					33	0
1641	Ovarian Cancer – Epithelial Ovarian Cancer/Fallopian Tube Cancer/Primary Peritoneal Cancer	20	210	420	420	21	18	0.857143	Yes					25	0
1642	Breast Cancer - Invasive	30	520	1040	1040	6	6	1	Yes					25	0
1643	Breast Cancer - Invasive	10	16	432	0	5	0	0	Yes					7	0
1644	Cervical Cancer	30	56	448	448	17	16	0.941176	Yes					24	0
1645	Colon Cancer	30	119	476	476	24	21	0.875	Yes					31	0
1646	Cervical Cancer	80	30	480	240	24	8	0.333333	Yes					42	0
1647	Colon Cancer	30	400	800	800	24	21	0.875	Yes					23	0
1648	Soft Tissue Sarcoma of the Extremity/Trunk	70	252	504	504	24	22	0.916667	Yes					25	0
1649	Carcinoma of Unknown Primary	80	238	476	476	24	22	0.916667	Yes					33	0
1650	Colon Cancer	90	456	912	912	17	16	0.941176	Yes					41	0
1651	Colon Cancer	70	441	882	882	24	22	0.916667	Yes					22	0
1652	Colon Cancer	70	441	8820	8820	5	5	1	Yes					16	0
1653	Carcinoma of Unknown Primary	70	50	500	500	5	5	1	Yes					28	0
1654	Colon Cancer	50	156	624	624	21	20	0.952381	Yes					31	0
1655	Breast Cancer - Invasive	60	432	864	864	21	19	0.904762	Yes					23	0
1656	Breast Cancer - Invasive	60	364	728	728	24	22	0.916667	Yes					38	0
1657	Pancreatic Adenocarcinoma	20	30	480	480	0	0		Yes					30	0
1658	Breast Cancer - Invasive	40	180	360	360	17	15	0.882353	Yes					61	0
1659	Colon Cancer	40	143	572	572	6	5	0.833333	Yes					26	0
1660	Non-Small Cell Lung Cancer (NSCLC)	40	90	540	540	5	0	0	Yes					25	0
1661	Non-Small Cell Lung Cancer (NSCLC)	90	126	504	504	21	20	0.952381	Yes					28	0
1662	Adenoid cystic carcinoma	90	30	480	480	0	0		Yes					17	0
1663	Breast Cancer - Invasive	90	500	1000	1000	2	2	1	Yes					18	3
1664	Breast Cancer - Invasive	90	375	750	750	24	0	0	No					0	0
1665	Breast Cancer - Invasive	20	108	432	432	0	0		Yes					21	0
1666	Central Nervous System Cancers - Glioblastoma	80	500	1000	1000	7	7	1	Yes					29	0
1667	Osteosarcoma	80	280	560	560	5	5	1	Yes					25	0
1668	Head and Neck Cancers - Cancer of the Nasopharynx	70	260	520	520	10	9	0.9	Yes					47	0
1669	Colon Cancer	75	180	720	720	5	5	1	Yes					9	0
1670	Appendix	20	135	540	540	21	19	0.904762	Yes					36	0
1671	Breast Cancer - Invasive	80	594	1188	1188	24	22	0.916667	Yes					44	1
1672	Angiosarcoma	90	805	1610	1610	24	22	0.916667	Yes					22	0
1673	Hepatobiliary Cancers - Gallbladder Cancer	40	400	800	800	21	18	0.857143	Yes					26	1
1674	Breast Cancer - Invasive	60	90	540	540	24	23	0.958333	Yes					20	0
1675	Pancreatic Adenocarcinoma	25	169	676	676	24	23	0.958333	Yes					25	1
1676	Carcinoma of Unknown Primary	55	208	832	832	24	21	0.875	Yes					35	0
1677	Non-Small Cell Lung Cancer (NSCLC)	30	180	720	720	6	6	1	Yes					17	0
1678	Prostate Cancer	50	200	800	800	21	20	0.952381	Yes					34	0
1679	Breast Cancer - Invasive	40	396	792	792	24	23	0.958333	Yes					20	0
1680	Pancreatic Adenocarcinoma	20	540	1080	1080	6	6	1	Yes					12	3
1681	Colon Cancer	10	90	540	540	9	9	1	Yes					18	4
1682	Carcinoma of Unknown Primary	70	441	882	882	26	20	0.769231	Yes					33	0
1683	Rectal Cancer	20	770	1540	1540	24	19	0.791667	Yes					35	0
1684	Non-Small Cell Lung Cancer (NSCLC)	25	210	840	840	9	8	0.888889	Yes					29	0
1685	Central Nervous System Cancers - Meningiomas	80	225	900	900	6	5	0.833333	Yes					7	0
1686	Non-Small Cell Lung Cancer (NSCLC)	80	600	1200	1200	24	22	0.916667	Yes					40	0
1687	Melanoma	85	210	840	840	24	24	1	Yes					19	0
1688	Non-Small Cell Lung Cancer (NSCLC)	20	600	1200	1200	9	9	1	Yes					28	0
1689	Non-Small Cell Lung Cancer (NSCLC)	20	300	600	600	24	22	0.916667	Yes					36	0
1690	Non-Small Cell Lung Cancer (NSCLC)	70	54	540	540	9	9	1	Yes					39	0
1691	Non-Small Cell Lung Cancer (NSCLC)	80	100	600	600	9	8	0.888889	Yes					26	0
1692	Prostate Cancer	80	600	1200	1200	7	6	0.857143	Yes					30	0
1693	Carcinoma of Unknown Primary	70	140	560	560	8	8	1	Yes					26	0
1694	Soft Tissue Sarcoma - Gastrointestinal Stromal Tumors (GIST)	90	425	850	850	7	5	0.714286	Yes					21	0
1695	Penile Cancer	80	204	816	816	2	2	1	Yes					26	0
1696	Soft Tissue Sarcoma of the Extremity/Trunk	50	375	750	750	10	9	0.9	Yes					23	0
1697	Breast Cancer - Invasive	5	500	1000	1000	4	4	1	Yes					20	0
1698	Mesothelioma Pleura	70	25	150	0	24	2	0.0833333	Yes					18	0
1699	Ovarian Cancer – Epithelial Ovarian Cancer/Fallopian Tube Cancer/Primary Peritoneal Cancer	60	300	600	600	6	6	1	Yes					12	0
1700	Breast Cancer - Invasive	80	600	1200	1200	0	0		Yes					25	0
1701	Breast Cancer - Invasive	90	484	968	968	24	21	0.875	Yes					22	0
1702	Bone Cancer - Osteosarcoma	60	484	968	968	11	10	0.909091	Yes					15	0
1703	Germ Cell Tumors	35	225	900	900	24	22	0.916667	Yes					17	0
1704	Head and Neck Cancers - Cancer of the Glottic Larynx	70	180	720	720	0	0		No					0	0
1705	Breast Cancer - Invasive	90	600	1200	1200	24	23	0.958333	Yes					12	0
1706	Prostate Cancer	30	90	540	540	24	20	0.833333	Yes					15	4
1707	Breast Cancer - Invasive	90	289	578	578	24	22	0.916667	Yes					54	0
1708	Breast Cancer - Invasive	25	100	600	600	0	0		Yes					24	0
1709	Breast Cancer - Invasive	85	300	600	600	24	20	0.833333	Yes					20	0
1710	Non-Small Cell Lung Cancer (NSCLC)	90	500	1000	1000	24	22	0.916667	Yes					22	0
1711	Colon Cancer	35	90	540	540	6	6	1	Yes					20	0
1712	Hepatobiliary Cancers - Hepatocellular Carcinoma	80	500	1000	1000	7	5	0.714286	Yes					25	0
1713	Head and Neck Cancers - Cancer of the Oral Cavity	40	400	800	800	6	5	0.833333	Yes					8	0
1714	Breast Cancer - Invasive	40	165	660	660	24	21	0.875	Yes					20	0
1715	Ovarian Cancer – Epithelial Ovarian Cancer/Fallopian Tube Cancer/Primary Peritoneal Cancer	45	400	800	800	24	22	0.916667	Yes					43	0
1716	Hepatobiliary Cancers - Gallbladder Cancer	60	150	600	600	24	20	0.833333	No					12	0
1717	Breast Cancer - Invasive	95	80	640	640	24	22	0.916667	Yes					39	2
1718	Non-Small Cell Lung Cancer (NSCLC)	35	400	800	800	0	0		Yes					18	1
1719	Colon Cancer	90	225	1800	1800	6	6	1	Yes					22	0
1720	Soft Tissue Sarcoma - Gastrointestinal Stromal Tumors (GIST)	95	600	1200	1200	7	4	0.571429	Yes					13	0
1721	Soft Tissue Sarcoma - Desmoid Tumors (Agressive Fibromatosis)	90	100	600	600	24	19	0.791667	Yes					14	0
1722	Central Nervous System Cancers - Glioblastoma	90	225	900	900	7	7	1	Yes					13	0
1723	Non-Small Cell Lung Cancer (NSCLC)	40	60	600	600	6	6	1	Yes					5	3
1724	Carcinoma of Unknown Primary	80	60	600	600	2	2	1	Yes					26	0
1725	Esophageal and Esophagogastric Junction Cancers	10	150	600	600	7	6	0.857143	Yes					32	0
1726	Breast Cancer - Invasive	90	300	600	600	7	5	0.714286	Yes					33	0
1727	Spindle Cell Sarcoma	80	225	900	900	0	0		Yes					3	0
1728	Neuroendocrine Tumors - Poorly Differentiated (High-Grade)/Large or Small Cell	85	120	720	720	0	0		No					0	0
1729	Prostate Cancer	45	225	450	450	24	24	1	Yes					16	0
1730	Leiomyosarcoma, NOS	90	121	484	484	8	8	1	Yes					35	0
1731	Carcinoma of Unknown Primary	90	300	600	600	0	0		Yes					26	0
1732	Ovarian Cancer – Epithelial Ovarian Cancer/Fallopian Tube Cancer/Primary Peritoneal Cancer	90	150	600	600	7	7	1	Yes					25	0
1733	Non-Small Cell Lung Cancer (NSCLC)	80	360	720	720	24	22	0.916667	Yes					25	0
1734	Hepatobiliary Cancers - Hepatocellular Carcinoma	90	900	1800	1800	24	20	0.833333	Yes					17	0
1735	Non-Small Cell Lung Cancer (NSCLC)	70	600	1200	1200	24	20	0.833333	Yes					16	0
1736	Breast Cancer - Invasive	85	120	480	480	24	22	0.916667	Yes					24	0
1737	Soft Tissue Sarcoma of the Extremity/Trunk	80	375	750	750	24	21	0.875	Yes					18	0
1738	Carcinoma of Unknown Primary	85	150	600	600	24	20	0.833333	Yes					41	0
1739	Ovarian Cancer - Malignant Germ Cell Tumors	60	100	600	600	7	4	0.571429	Yes					15	0
1740	Non-Small Cell Lung Cancer (NSCLC)	25	81	648	648	9	8	0.888889	Yes					30	0
1741	Non-Small Cell Lung Cancer (NSCLC)	85	144	576	576	9	9	1	Yes					11	0
1742	Angiosarcoma	35	550	1100	1100	24	21	0.875	Yes					32	0
1743	Central Nervous System Cancers - Glioblastoma	70	400	800	800	2	2	1	Yes					16	0
1744	Breast Cancer - Invasive	80	400	800	800	6	6	1	Yes					7	0
1745	Prostate Cancer	20	49	588	588	1	1	1	Yes					40	0
1746	Mesothelioma Peritoneal	30	400	800	800	21	17	0.809524	Yes					7	0
1747	Colon Cancer	70	25	500	250	14	14	1	Yes					39	0
1748	Uterine Neoplasms - Endometrial Carcinoma	95	80	640	640	24	22	0.916667	Yes					39	0
1749	Non-Small Cell Lung Cancer (NSCLC)	80	56	560	560	6	6	1	Yes					4	0
1750	Ovarian Cancer – Epithelial Ovarian Cancer/Fallopian Tube Cancer/Primary Peritoneal Cancer	80	600	1200	1200	8	6	0.75	Yes					25	0
1751	Rectal Cancer	35	36	0	0	10	9	0.9	Yes					25	4
1752	Breast Cancer - Invasive	90	100	600	600	6	6	1	Yes					6	0
1753	Non-Small Cell Lung Cancer (NSCLC)	60	150	600	600	21	18	0.857143	Yes					13	0
1754	Lung Neuroendocrine Tumors	70	400	800	800	5	4	0.8	Yes					24	0
1755	Non-Small Cell Lung Cancer (NSCLC)	90	500	1000	1000	24	22	0.916667	Yes					20	0
1756	Soft Tissue Sarcoma - Desmoid Tumors (Agressive Fibromatosis)	90	40	560	0	9	0	0	Yes					18	0
1757	Soft Tissue Sarcoma - Gastrointestinal Stromal Tumors (GIST)	70	700	1400	1400	24	20	0.833333	Yes					39	0
1758	Central Nervous System Cancers - Glioblastoma	60	500	1000	1000	10	9	0.9	Yes					31	0
1759	Soft Tissue Sarcoma - Gastrointestinal Stromal Tumors (GIST)	95	500	1000	1000	7	5	0.714286	Yes					30	0
1760	Breast Cancer - Invasive	90	500	1000	1000	24	21	0.875	Yes					38	0
1761	Breast Cancer - Invasive	85	100	600	600	7	6	0.857143	Yes					9	0
1762	Rectal Cancer	25	180	720	720	7	6	0.857143	Yes					41	0
1763	Gastric Cancer	55	130	520	520	0	0		Yes					3	0
1764	Non-Small Cell Lung Cancer (NSCLC)	50	100	600	600	0	0		Yes					20	0
1765	Mesothelioma Pleura	80	150	0	1800	0	0		Yes					6	0
1766	Non-Small Cell Lung Cancer (NSCLC)	95	50	500	500	0	0		Yes					13	1
1767	Non-Small Cell Lung Cancer (NSCLC)	70	100	600	600	24	21	0.875	Yes					27	0
1768	Non-Small Cell Lung Cancer (NSCLC)	60	500	1000	1000	2	2	1	Yes					26	3
1769	Soft Tissue Sarcoma - Gastrointestinal Stromal Tumors (GIST)	5	500	1000	1000	2	2	1	Yes					19	0
1770	Breast Cancer - Invasive	85	25	500	500	0	0		No					0	0
1771	Thyroid Carcinoma - Medullary Carcinoma	50	25	500	500	4	3	0.75	Yes					29	0
1772	Breast Cancer - Invasive	80	500	1000	1000	24	22	0.916667	Yes					11	0
1773	Germ Cell Tumors	90	30	480	480	5	5	1	Yes					33	3
1774	Breast Cancer - Invasive	10	100	600	600	24	23	0.958333	Yes					53	0
1775	Non-Small Cell Lung Cancer (NSCLC)	85	150	600	600	9	8	0.888889	Yes					23	0
1776	Gastric Cancer	30	400	800	800	0	0		Yes					20	0
1777	Pancreatic Adenocarcinoma	80	225	900	900	7	6	0.857143	Yes					20	0
1778	Colon Cancer	90	50	500	500	2	2	1	Yes					0	0
1779	Ovarian Cancer – Epithelial Ovarian Cancer/Fallopian Tube Cancer/Primary Peritoneal Cancer	70	225	900	900	7	5	0.714286	Yes					35	0
1780	Non-Small Cell Lung Cancer (NSCLC)	40	50	500	0	1	1	1	Yes					1	0
1781	Non-Small Cell Lung Cancer (NSCLC)	30	42	504	504	7	7	1	Yes					37	0
1782	Breast Cancer - Invasive	50	42	504	504	1	1	1	Yes					27	0
1783	Non-Small Cell Lung Cancer (NSCLC)	25	100	600	600	7	5	0.714286	Yes					12	0
1784	Non-Small Cell Lung Cancer (NSCLC)	65	2	20	0	0	0		No					0	8
1785	Non-Small Cell Lung Cancer (NSCLC)	70	25	250	0	0	0		No					0	2
1786	Non-Small Cell Lung Cancer (NSCLC)	50	400	800	800	8	5	0.625	Yes					27	1
1787	Gastric Cancer	10	25	250	0	9	3	0.333333	Yes					16	0
1788	Breast Cancer - Invasive	75	54	540	0	9	4	0.444444	Yes					20	0
1789	Colon Cancer	90	500	1000	1000	7	6	0.857143	Yes					31	0
1790	Soft Tissue Sarcoma - Rhabdomyosarcoma	90	600	1200	1200	9	8	0.888889	Yes					31	0
1791	Non-Small Cell Lung Cancer (NSCLC)	75	100	800	800	13	13	1	Yes					28	0
1792	Melanoma	50	42	504	504	2	2	1	Yes					23	0
1793	Non-Small Cell Lung Cancer (NSCLC)	70	100	600	0	9	3	0.333333	Yes					19	0
1794	Colon Cancer	65	100	600	600	0	0		Yes					3	0
1795	Vulva	65	400	800	800	4	4	1	Yes					20	5
1796	Carcinoma of Unknown Primary	50	36	504	504	0	0		Yes					35	0
1797	Central Nervous System Cancers - Low grade astrocytoma	85	400	800	800	21	18	0.857143	Yes					14	2
1798	Breast Cancer - Invasive	70	400	800	800	24	19	0.791667	Yes					30	0
1799	Central Nervous System Cancers - Low grade astrocytoma	90	375	750	750	7	6	0.857143	Yes					20	0
1800	Breast Cancer - Invasive	60	400	800	800	9	9	1	Yes					27	0
1801	Colon Cancer	10	400	800	800	1	1	1	Yes					43	8
1802	Colon Cancer	20	500	1000	1000	7	6	0.857143	Yes					11	0
1803	Non-Small Cell Lung Cancer (NSCLC)	70	200	800	800	24	20	0.833333	Yes					40	0
1804	Non-Small Cell Lung Cancer (NSCLC)	60	36	504	504	21	17	0.809524	Yes					13	0
1805	Non-Small Cell Lung Cancer (NSCLC)	15	225	900	900	3	3	1	Yes					13	0
1806	Breast Cancer - Invasive	60	25	500	500	7	7	1	Yes					8	0
1807	Thyroid Carcinoma - Follicular Carcinoma	90	500	1000	1000	3	3	1	Yes					14	0
1808	Colon Cancer	20	100	600	600	9	8	0.888889	Yes					26	0
1809	Neuroendocrine Tumors - Poorly Differentiated (High-Grade)/Large or Small Cell	90	500	1000	1000	24	20	0.833333	Yes					20	0
1810	Bladder Cancer	80	200	800	800	9	9	1	Yes					36	0
1811	Non-Small Cell Lung Cancer (NSCLC)	60	0	0	0	1	1	1	No					0	0
1812	Ovarian Cancer – Epithelial Ovarian Cancer/Fallopian Tube Cancer/Primary Peritoneal Cancer	70	120	720	720	24	24	1	Yes					45	0
1813	Uterine Neoplasms - Endometrial Carcinoma	90	300	600	600	3	3	1	Yes					19	0
1814	Non-Small Cell Lung Cancer (NSCLC)	5	75	450	450	24	21	0.875	Yes					20	11
1815	Non-Small Cell Lung Cancer (NSCLC)	60	0	0	0	4	4	1	No					0	0
1816	Neuroendocrine Tumors - Poorly Differentiated (High-Grade)/Large or Small Cell	90	60	480	480	1	1	1	Yes					17	0
1817	Pancreatic Adenocarcinoma	65	300	600	600	24	20	0.833333	Yes					16	0
1818	Breast Cancer - Invasive	85	450	900	900	24	21	0.875	Yes					39	2
1819	Non-Small Cell Lung Cancer (NSCLC)	30	375	750	750	7	4	0.571429	Yes					19	0
1820	Carcinoma of Unknown Primary	70	270	540	540	7	5	0.714286	Yes					17	0
1821	Breast Cancer - Invasive	90	240	960	960	24	21	0.875	Yes					34	0
1822	Breast Cancer - Invasive	3	100	600	600	9	9	1	Yes					30	39
1823	Carcinoma of Unknown Primary	55	50	500	500	1	1	1	Yes					12	3
1824	Non-Small Cell Lung Cancer (NSCLC)	20	500	1000	1000	1	1	1	Yes					18	5
1825	Colon Cancer	30	225	900	900	7	6	0.857143	Yes					21	1
1826	Appendix	40	450	900	900	24	22	0.916667	Yes					32	0
1827	Mesothelioma Pleura	90	64	512	512	1	1	1	Yes					31	5
1828	Carcinoma of Unknown Primary	75	225	900	900	3	3	1	Yes					26	0
1829	Melanoma	35	40	560	560	7	6	0.857143	Yes					12	0
1830	Colon Cancer	50	450	900	900	24	21	0.875	Yes					25	0
1831	Ovarian Cancer – Epithelial Ovarian Cancer/Fallopian Tube Cancer/Primary Peritoneal Cancer	10	80	640	640	10	9	0.9	Yes					27	20
1832	Non-Small Cell Lung Cancer (NSCLC)	5	299	598	598	0	0		Yes					25	0
1833	Non-Small Cell Lung Cancer (NSCLC)	15	500	1000	1000	24	22	0.916667	Yes					29	11
1834	Head and Neck Cancers - Maxillary Sinus Tumors	30	600	1200	1200	1	1	1	Yes					6	0
1835	Colon Cancer	30	80	640	640	0	0		Yes					18	0
1836	Urothelial Carcinoma	70	450	900	900	24	23	0.958333	Yes					41	0
1837	Breast Cancer - Invasive	70	30	540	540	0	0		Yes					28	0
1838	Carcinoma of Unknown Primary	40	30	270	270	22	21	0.954545	Yes					23	4
1839	Carcinoma of Unknown Primary	30	80	640	640	10	10	1	Yes					32	0
1840	Carcinoma of Unknown Primary	30	100	600	600	10	9	0.9	Yes					32	0
1841	Gastric Cancer	40	144	576	576	8	8	1	Yes					15	0
1842	Soft Tissue Sarcoma of the Extremity/Trunk	85	64	512	512	24	22	0.916667	Yes					24	0
1843	Non-Small Cell Lung Cancer (NSCLC)	30	100	600	600	8	7	0.875	Yes					12	0
1844	Breast Cancer - Invasive	90	360	720	720	3	3	1	Yes					20	6
1845	Hepatobiliary Cancers - Hepatocellular Carcinoma	20	0	0	0	0	0		Yes					22	0
1846	Breast Cancer - Invasive	45	100	600	600	10	10	1	Yes					30	0
1847	Colon Cancer	75	100	600	600	12	11	0.916667	Yes					30	0
1848	Colon Cancer	60	600	1200	1200	8	6	0.75	Yes					22	0
1849	Gastric Cancer	85	270	540	540	8	6	0.75	Yes					14	0
1850	Neuroendocrine Tumors - Poorly Differentiated (High-Grade)/Large or Small Cell	85	54	0	540	1	1	1	No					0	0
1851	Breast Cancer - Invasive	90	300	600	600	0	0		Yes					26	0
1852	Non-Small Cell Lung Cancer (NSCLC)	20	65	520	520	8	6	0.75	Yes					14	13
1853	Ewing's Sarcoma	85	300	600	600	8	8	1	Yes					30	0
1854	Kidney Cancer	40	500	1000	1000	0	0		Yes					28	0
1855	Appendix	30	500	1000	1000	6	6	1	Yes					11	2
1856	Bladder Cancer	90	40	560	560	0	0		Yes					16	0
1857	Ovarian Cancer – Epithelial Ovarian Cancer/Fallopian Tube Cancer/Primary Peritoneal Cancer	15	49	588	588	10	10	1	Yes					15	0
1858	Breast Cancer - Invasive	65	500	1000	1000	8	6	0.75	Yes					20	0
1859	Breast Cancer - Invasive	30	42	504	504	10	8	0.8	Yes					18	1
1860	Breast Cancer - Invasive	40	360	720	720	10	10	1	Yes					14	0
1861	Non-Small Cell Lung Cancer (NSCLC)	80	450	900	900	8	7	0.875	Yes					16	0
1862	Non-Small Cell Lung Cancer (NSCLC)	15	0	0	0	8	8	1	Yes					37	0
1863	Non-Small Cell Lung Cancer (NSCLC)	30	0	0	0	0	0		Yes					5	0
1864	Bladder Cancer	90	300	600	600	10	7	0.7	Yes					17	0
1865	Small intestine cancer	80	300	600	600	8	8	1	Yes					22	0
1866	Non-Small Cell Lung Cancer (NSCLC)	90	440	880	880	3	3	1	Yes					13	0
1867	Non-Melanoma Skin Cancers - Squamous Cell Skin Cancers	80	100	600	600	5	5	1	No					9	0
1868	Breast Cancer - Invasive	95	20	240	240	3	3	1	Yes					20	0
1869	Non-Small Cell Lung Cancer (NSCLC)	70	36	504	504	21	20	0.952381	Yes					34	0
1870	Colon Cancer	65	50	500	500	10	9	0.9	Yes					28	0
1871	Non-Small Cell Lung Cancer (NSCLC)	70	0	0	0	0	0		Yes					0	0
1872	Non-Small Cell Lung Cancer (NSCLC)	5	200	800	800	8	7	0.875	Yes					7	5
1873	Small Cell Lung Cancer (SCLC)	70	70	560	560	24	23	0.958333	Yes					33	0
1874	Central Nervous System Cancers - Anaplastic Gliomas	60	21	189	189	1	1	1	Yes					7	0
1875	Uterine Neoplasms - Endometrial Carcinoma	80	9	18	18	8	6	0.75	No					3	0
1876	Breast Cancer - Invasive	90	16	64	64	0	0		Yes					25	0
1877	Melanoma	90	690	1380	1380	0	0		Yes					26	0
1878	Breast Cancer - Invasive	10	16	272	272	2	2	1	Yes					30	19
1879	Colon Cancer	30	270	540	540	10	10	1	Yes					27	1
1880	Non-Small Cell Lung Cancer (NSCLC)	20	25	350	350	8	7	0.875	Yes					20	8
1881	Colon Cancer	60	225	900	900	8	8	1	Yes					15	0
1882	Breast Cancer - Invasive	30	100	600	600	8	6	0.75	Yes					19	0
1883	Non-Small Cell Lung Cancer (NSCLC)	30	575	1150	1150	8	7	0.875	Yes					23	0
1884	Non-Small Cell Lung Cancer (NSCLC)	35	0	0	0	0	0		Yes					20	0
1885	Non-Small Cell Lung Cancer (NSCLC)	5	375	750	750	3	3	1	Yes					6	33
1886	Non-Small Cell Lung Cancer (NSCLC)	60	225	900	900	10	9	0.9	Yes					20	0
1887	Gastric Cancer	5	81	648	648	10	10	1	Yes					26	5
1888	Non-Small Cell Lung Cancer (NSCLC)	50	225	900	900	8	7	0.875	Yes					23	0
1889	Colon Cancer	65	280	560	560	3	3	1	Yes					16	0
1890	Breast Cancer - Invasive	60	35	420	420	0	0		Yes					30	0
1891	Urothelial Carcinoma	60	0	0	0	1	1	1	Yes					0	0
1892	Non-Small Cell Lung Cancer (NSCLC)	30	81	648	648	24	22	0.916667	Yes					13	1
1893	Non-Small Cell Lung Cancer (NSCLC)	10	70	700	700	24	22	0.916667	Yes					30	0
1894	Ewing's Sarcoma	45	49	588	588	8	6	0.75	Yes					18	0
1895	Breast Cancer - Invasive	75	60	600	600	24	22	0.916667	Yes					33	0
1896	Non-Small Cell Lung Cancer (NSCLC)	40	500	1000	1000	0	0		Yes					18	0
1897	Colon Cancer	50	330	660	660	3	3	1	Yes					19	6
1898	Colon Cancer	40	52	208	208	0	0		Yes					0	4
1899	Breast Cancer - Invasive	40	100	600	600	10	10	1	Yes					28	4
1900	Ewing's Sarcoma	60	36	504	504	0	0		No					0	0
1901	Breast Cancer - Invasive	90	270	540	540	8	7	0.875	Yes					15	1
1902	Non-Small Cell Lung Cancer (NSCLC)	85	40	480	480	24	23	0.958333	Yes					40	0
1903	Soft Tissue Sarcoma - Gastrointestinal Stromal Tumors (GIST)	80	48	576	576	9	9	1	Yes					28	0
1904	Breast Cancer - Invasive	15	32	512	512	10	10	1	Yes					28	0
1905	Breast Cancer - Invasive	0	420	840	840	0	0		Yes					21	0
1906	Esophageal and Esophagogastric Junction Cancers	95	270	540	540	24	22	0.916667	Yes					25	6
1907	Non-Small Cell Lung Cancer (NSCLC)	70	255	510	510	11	9	0.818182	Yes					18	5
1908	Transitional Cell Cancer of the Renal Pelvis and Ureter	80	90	540	540	8	8	1	Yes					38	0
1909	Rectal Cancer	20	25	500	500	3	3	1	Yes					39	5
1910	Non-Small Cell Lung Cancer (NSCLC)	70	0	0	0	10	9	0.9	Yes					24	1
1911	Non-Small Cell Lung Cancer (NSCLC)	90	529	1058	1058	3	3	1	Yes					13	3
1912	Appendix	80	0	0	0	0	0		No					0	7
1913	Bladder Cancer	90	144	576	576	0	0		Yes					5	5
1914	Hepatobiliary Cancers - Intrahepatic Cholangiocarcinoma	70	16	512	512	24	22	0.916667	Yes					40	0
1915	Hepatobiliary Cancers - Gallbladder Cancer	95	300	600	600	0	0		Yes					3	0
1916	Breast Cancer - Invasive	80	375	750	750	24	19	0.791667	Yes					36	0
1917	Thyroid Carcinoma - Papillary Carcinoma	90	225	2250	2250	2	2	1	Yes					40	0
1918	Non-Small Cell Lung Cancer (NSCLC)	5	240	960	960	10	10	1	Yes					44	40
1919	Colon Cancer	70	30	540	540	0	0		Yes					25	3
1920	Breast Cancer - Invasive	85	300	1200	1200	0	0		Yes					0	1
1921	Carcinoma of Unknown Primary	75	60	360	360	13	6	0.461538	Yes					19	5
1922	Non-Small Cell Lung Cancer (NSCLC)	60	400	1600	1600	0	0		Yes					19	3
1923	Colon Cancer	60	525	1050	1050	24	22	0.916667	Yes					32	4
1924	Non-Small Cell Lung Cancer (NSCLC)	50	27	540	540	0	0		Yes					8	2
1925	Carcinoma of Unknown Primary	85	120	720	720	10	2	0.2	Yes					7	5
1926	Non-Small Cell Lung Cancer (NSCLC)	45	525	1050	1050	4	4	1	Yes					32	0
1927	Hepatobiliary Cancers - Intrahepatic Cholangiocarcinoma	85	425	850	850	2	2	1	Yes					20	0
1928	Anal Carcinoma	25	75	600	600	6	6	1	Yes					34	0
1929	Hepatobiliary Cancers - Intrahepatic Cholangiocarcinoma	60	48	384	384	9	2	0.222222	Yes					21	0
1930	Non-Small Cell Lung Cancer (NSCLC)	15	450	900	900	0	0		Yes					31	0
1931	Ovarian Cancer – Epithelial Ovarian Cancer/Fallopian Tube Cancer/Primary Peritoneal Cancer	95	14	140	140	2	2	1	Yes					23	0
1932	Breast Cancer - Invasive	75	24	576	576	7	0	0	Yes					26	2
1933	Non-Small Cell Lung Cancer (NSCLC)	70	45	540	540	1	1	1	Yes					39	0
1934	Esophageal and Esophagogastric Junction Cancers	30	70	210	700	0	0		Yes					5	0
1935	Breast Cancer - Invasive	70	80	640	640	8	7	0.875	Yes					21	0
1936	Uterine Neoplasms - Endometrial Carcinoma	25	18	504	504	7	6	0.857143	Yes					12	0
1937	Bladder Cancer	30	32	512	512	2	2	1	Yes					26	0
1938	Prostate Cancer	70	196	784	784	23	18	0.782609	Yes					15	0
1939	Breast Cancer - Invasive	25	324	648	648	3	3	1	Yes					21	0
1940	Non-Small Cell Lung Cancer (NSCLC)	60	272	1088	1088	10	8	0.8	Yes					31	0
1941	Ovarian Cancer – Epithelial Ovarian Cancer/Fallopian Tube Cancer/Primary Peritoneal Cancer	40	25	500	500	7	6	0.857143	No					8	0
1942	Adenoid cystic carcinoma	30	540	2160	2160	3	3	1	Yes					17	0
1943	Breast Cancer - Invasive	95	195	780	780	23	21	0.913043	Yes					39	0
1944	Small intestine cancer	70	425	1700	1700	7	4	0.571429	Yes					15	0
1945	Urothelial Carcinoma	75	30	270	270	7	0	0	Yes					10	0
1946	Non-Small Cell Lung Cancer (NSCLC)	85	238	952	952	8	6	0.75	Yes					22	0
1947	Non-Small Cell Lung Cancer (NSCLC)	80	360	1440	1440	11	10	0.909091	Yes					32	0
1948	Head and Neck Cancers - Cancer of the Oral Cavity	1	600	2400	2400	7	5	0.714286	Yes					21	0
1949	Non-Melanoma Skin Cancers - Squamous Cell Skin Cancers	70	300	1200	1200	7	6	0.857143	Yes					10	0
1950	Ovarian Cancer – Epithelial Ovarian Cancer/Fallopian Tube Cancer/Primary Peritoneal Cancer	65	75	600	600	8	8	1	Yes					36	0
1951	Breast Cancer - Invasive	70	240	960	960	0	0		Yes					5	0
1952	Soft Tissue Sarcoma - Gastrointestinal Stromal Tumors (GIST)	80	340	2040	2040	0	0		Yes					0	0
1953	Soft Tissue Sarcoma - Gastrointestinal Stromal Tumors (GIST)	90	360	1440	1440	23	21	0.913043	Yes					44	0
1954	Soft Tissue Sarcoma - Gastrointestinal Stromal Tumors (GIST)	95	0	0	0	24	5	0.208333	No					4	0
1955	Soft Tissue Sarcoma - Gastrointestinal Stromal Tumors (GIST)	95	300	1200	1200	7	6	0.857143	Yes					20	0
1956	Head and Neck Cancers - Cancer of the Nasopharynx	85	300	600	600	1	1	1	Yes					17	0
1957	Bladder Cancer	70	306	1224	1224	9	7	0.777778	Yes					36	0
1958	Gastric Cancer	80	286	572	572	3	3	1	Yes					24	1
1959	Soft Tissue Sarcoma - Gastrointestinal Stromal Tumors (GIST)	95	50	500	500	0	0		Yes	Pass	Pass	Nucleic acid quality failure	Pass	6	0
1960	Soft Tissue Sarcoma - Gastrointestinal Stromal Tumors (GIST)	95	96	576	576	0	0		Yes	Pass	Pass	Pass	Pass	17	0
1961	Non-Small Cell Lung Cancer (NSCLC)	90	40	640	640	0	0		Yes	Pass	Pass	Nucleic acid quality failure	Pass	6	0
1962	Non-Small Cell Lung Cancer (NSCLC)	60	100	600	600	0	0		Yes	Pass	Pass	Pass	Pass	16	0
1963	Thyroid Carcinoma - Papillary Carcinoma	90	35	560	560	23	20	0.869565	Yes					15	0
1964	Soft Tissue Sarcoma - Gastrointestinal Stromal Tumors (GIST)	90	40	560	560	7	7	1	Yes					23	0
1965	Soft Tissue Sarcoma - Gastrointestinal Stromal Tumors (GIST)	90	36	504	504	0	0		Yes					8	0
1966	Soft Tissue Sarcoma - Gastrointestinal Stromal Tumors (GIST)	95	150	600	600	0	0		Yes	Pass	Pass	Pass	Pass	17	0
1967	Ovarian Cancer – Epithelial Ovarian Cancer/Fallopian Tube Cancer/Primary Peritoneal Cancer	90	96	576	576	0	0		Yes	Pass	Pass	Nucleic acid quality failure	Pass	6	0
1968	Leiomyosarcoma, NOS	99	25	500	500	10	9	0.9	Yes					30	0
1969	Non-Small Cell Lung Cancer (NSCLC)	70	80	640	640	2	2	1	Yes					28	1
1970	Head and Neck Cancers - Cancer of the Oral Cavity	60	200	800	800	0	0		Yes					13	0
1971	Neuroendocrine Tumors - Poorly Differentiated (High-Grade)/Large or Small Cell	90	80	640	640	0	0		Yes	Pass	Pass	Pass	Pass	10	0
1972	Non-Small Cell Lung Cancer (NSCLC)	60	80	640	640	0	0		Yes	Pass	Pass	Nucleic acid quality failure	Pass	8	1
1973	Ovarian Cancer – Epithelial Ovarian Cancer/Fallopian Tube Cancer/Primary Peritoneal Cancer	60	48	576	576	0	0		Yes					8	0
1974	Breast Cancer - Invasive	90	0	0	0	9	8	0.888889	No					7	0
1975	Breast Cancer - Invasive	30	195	780	780	23	18	0.782609	Yes					22	2
1976	Breast Cancer - Invasive	80	30	480	480	7	5	0.714286	Yes	Pass	Pass	Pass	Pass	23	0
1977	Ovarian Cancer – Epithelial Ovarian Cancer/Fallopian Tube Cancer/Primary Peritoneal Cancer	30	225	900	900	23	21	0.913043	Yes	Pass	Pass	Pass	Pass	15	0
1978	Non-Small Cell Lung Cancer (NSCLC)	70	210	840	840	0	0		Yes					10	0
1979	Non-Small Cell Lung Cancer (NSCLC)	85	144	576	576	0	0		Yes					26	0
1980	Uterine Neoplasms - Endometrial Carcinoma	55	460	1840	1840	14	13	0.928571	Yes					8	6
1981	Non-Small Cell Lung Cancer (NSCLC)	40	208	832	832	8	6	0.75	Yes					16	0
1982	Bladder Cancer	90	70	560	560	7	7	1	Yes					19	0
1983	Breast Cancer - Invasive	95	25	500	500	23	19	0.826087	Yes					44	1
1984	Non-Small Cell Lung Cancer (NSCLC)	90	360	720	720	7	5	0.714286	Yes	Pass	Pass	Pass	Pass	17	4
1985	Breast Cancer - Invasive	80	25	500	500	10	10	1	Yes	Pass	Pass	Pass	Pass	34	0
1986	Pancreatic Adenocarcinoma	25	28	504	504	10	10	1	Yes	Pass	Pass	Pass	Pass	25	0
1987	Kidney Cancer	70	204	816	816	0	0		Yes	Pass	Pass	Pass	Pass	6	0
1988	Breast Cancer - Invasive	5	0	0	0	3	3	1	No					0	0
1989	Ovarian Cancer – Epithelial Ovarian Cancer/Fallopian Tube Cancer/Primary Peritoneal Cancer	50	500	1000	1000	0	0		Yes	Pass	Pass	Pass	Pass	5	0
1990	Non-Small Cell Lung Cancer (NSCLC)	20	100	600	600	8	8	1	Yes	Pass	Pass	Pass	Pass	36	0
1991	Breast Cancer - Invasive	25	60	960	960	23	21	0.913043	Yes	Pass	Pass	Pass	Pass	29	0
1992	Ovarian Cancer – Epithelial Ovarian Cancer/Fallopian Tube Cancer/Primary Peritoneal Cancer	70	460	460	460	2	2	1	Yes	Pass	Pass	Pass	Pass	23	0
1993	Uterine Neoplasms - Uterine Sarcoma	40	20	420	420	0	0		Yes					0	0
1994	Breast Cancer - Invasive	85	345	1380	1380	23	23	1	Yes	Pass	Pass	Nucleic acid quality failure	Pass	20	0
1995	Melanoma	50	308	616	616	2	2	1	Yes	Pass	Pass	Pass	Pass	9	0
1996	Non-Small Cell Lung Cancer (NSCLC)	60	384	1536	1536	7	5	0.714286	Yes	Pass	Pass	Pass	Pass	20	0
1997	Non-Small Cell Lung Cancer (NSCLC)	30	18	252	252	1	1	1	Yes	Pass	Pass	Pass	Pass	24	0
[truncated: 703 more rows]
